# Supplementary material for: Diastereo- and enantioselective synthesis of biaryl aldehydes bearing both axial and central chirality
Source: Royal Society of Chemistry journal article supplement (doi:10.1039/d3cc00708a), 2023-01-01

# Diastereo- and enantioselective synthesis of biaryl aldehydes bearing both axial and central chirality

Fen Huang,<sup>a</sup> Ling-Fei Tao,<sup>a</sup> Jiyong Liu,<sup>b</sup> Linghui Qian<sup>\*a</sup> and Jia-Yu Liao<sup>\*ac</sup>

<sup>a</sup>. College of Pharmaceutical Sciences, and Hangzhou Institute of Innovative Medicine, Zhejiang University, Hangzhou 310058, China. E-mail: lhqian@zju.edu.cn, jyliao@zju.edu.cn

<sup>b</sup>. Department of Chemistry, Zhejiang University, Hangzhou 310058, China.

<sup>c</sup>. Innovation Institute for Artificial Intelligence in Medicine of Zhejiang University, Hangzhou 310018, China.

## Supplementary Information

| Table of contents                                                       | Page |
|-------------------------------------------------------------------------|------|
| I. General information                                                  | S2   |
| II. Preparation of activated isocyanides <b>2</b>                       | S3   |
| III. Metal salt and solvent screening                                   | S7   |
| IV. Silver-catalyzed desymmetric [3+2] cycloaddition reaction           | S7   |
| V. Characterization of compounds <b>3</b>                               | S8   |
| VI. Evaluation of the thermal stability of the chiral axis              | S32  |
| VII. Gram-scale reaction and derivatization                             | S33  |
| VIII. Isolation of <i>rac</i> - <b>3e'</b> and <i>rac</i> - <b>3e''</b> | S40  |
| IX. Crystal structure data of <b>3a</b> and <b>3a'</b>                  | S41  |
| X. References                                                           | S45  |
| XI. NMR spectra                                                         | S46  |

## I. General information

$^1\text{H}$ ,  $^{13}\text{C}$ ,  $^{19}\text{F}$ , and  $^{31}\text{P}$  spectra were recorded on a JNM-ECZ 400S (400 MHz) spectrometer. Chemical shifts were reported in parts per million (ppm), and the residual solvent peak was used as an internal reference:  $^1\text{H}$  ( $\text{CDCl}_3$   $\delta$  7.26;  $\text{DMSO-}d_6$   $\delta$  2.50),  $^{13}\text{C}$  ( $\text{CDCl}_3$   $\delta$  77.16;  $\text{DMSO-}d_6$   $\delta$  39.52). Data are reported as follows: chemical shift, multiplicity (s = singlet, d = doublet, t = triplet, q = quartet, m = multiplet, dd = doublet of doublets), coupling constants (Hz), and integration. Melting point (**MP**) was obtained on Buchi M-560. For thin-layer chromatography (**TLC**), Huanghai TLC plates (HSGF 254) were used, and compounds were visualized with UV light at 254 nm. Preparative HPLC was conducted on an Agilent HPLC 1260 Infinity II using an Agilent Prep column (10  $\mu\text{m}$ , Prep-C18, 100  $\text{\AA}$ , 250  $\times$  21.2 mm). High-resolution mass spectra (**HRMS**) were obtained on an Agilent 1290-6530 Q-TOF spectrometer. X-ray diffraction analysis was performed on a Bruker D8 Venture diffractometer. **Optical rotations** were recorded on an InsMark IP-digi 300 automatic polarimeter. Enantiomeric ratios (**er**) were determined by HPLC analysis on an Agilent HPLC 1260 Infinity II; column, Chiralpak IA, IB N-5, ID, and IF.

Unless otherwise noted, all reactions were carried out under an ambient atmosphere; exclusion of air or moisture was not required. Anhydrous and deuterated solvents were purchased from commercial suppliers and used as received without further purification. Prochiral biaryl dialdehydes **1**<sup>1</sup> and ligands **L1**,<sup>2</sup> **L4-L7**<sup>3</sup> were prepared according to literature procedures. Ligands **L2**, **L3**, and **L8** were purchased from commercial suppliers and used as received without further purification. The relative and absolute configurations of **3a** and **3a'** were unambiguously assigned by single-crystal X-ray diffraction analysis (CCDC 2181106 and 2241542, respectively), and those of other products were assigned by analogy.

## II. Preparation of activated isocyanides **2**

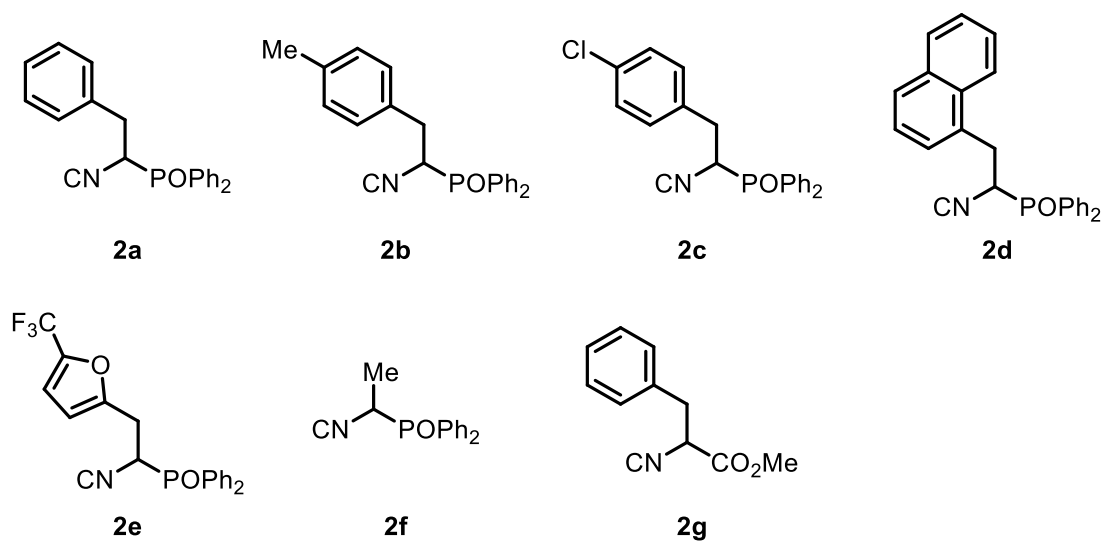

Figure S1. Activated isocyanides involved in this study

Isocynoacetate **2g** is a known compound and was prepared according to the literature procedure.<sup>4</sup> Isocyanides **2a-2f** were prepared from  $\alpha$ -isocyanomethylidiphenylphosphine oxide<sup>5</sup> and the corresponding halides according to the following procedure.

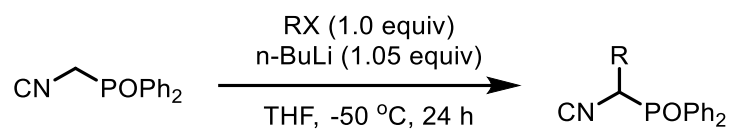

**General procedure.** To a solution of  $\alpha$ -isocyanomethylidiphenylphosphine oxide (1.0 equiv) in THF (0.02 M) under a nitrogen atmosphere was slowly added n-BuLi (2.5 M in hexane, 1.05 equiv) at  $-50\text{ }^\circ\text{C}$  and stirred for 0.5 h, then the corresponding halide (1.0 equiv) was added. After another 24 h, the reaction mixture was warmed to room temperature and filtered to remove insoluble solids. The filtrate was concentrated and the residue was purified by flash column chromatography to afford the corresponding activated isocyanide.

**(1-Isocyano-2-phenylethyl)diphenylphosphine oxide (2a)**

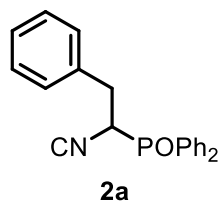

Purified by flash column chromatography (PE/EtOAc 1:1). White solid, 680 mg, 66% yield. **MP**: 185-186 °C; **<sup>1</sup>H NMR** (400 MHz, CDCl<sub>3</sub>): δ 8.04-7.97 (m, 2H), 7.93-7.86 (m, 2H), 7.71-7.52 (m, 6H), 7.34-7.27 (m, 3H), 7.25-7.21 (m, 2H), 4.51-4.43 (m, 1H), 3.47-3.38 (m, 1H), 2.82-2.72 (m, 1H); **<sup>13</sup>C NMR** (101 MHz, CDCl<sub>3</sub>): δ 162.6 (d, *J* = 3.0 Hz), 135.8 (d, *J* = 11.2 Hz), 133.4 (d, *J* = 2.9 Hz), 133.2 (d, *J* = 2.9 Hz), 132.6 (d, *J* = 8.9 Hz), 131.6 (d, *J* = 9.5 Hz), 129.3, 129.24, 129.19 (d, *J* = 102.6 Hz), 129.1 (d, *J* = 7.7 Hz), 129.0, 128.9, 127.7, 126.7, 56.1 (d, *J* = 70.7 Hz), 34.9; **<sup>31</sup>P NMR** (162 MHz, CDCl<sub>3</sub>): δ 28.5; **HRMS** (ESI) *m/z*: [M+Na]<sup>+</sup> Calcd for C<sub>21</sub>H<sub>18</sub>NNaOP 354.1018; Found 354.1018.

**(1-Isocyano-2-(*p*-tolyl)ethyl)diphenylphosphine oxide (2b)**

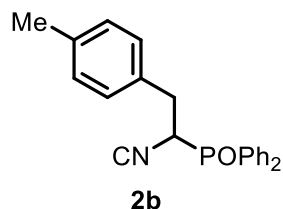

Purified by flash column chromatography (EtOAc). White solid, 250 mg, 72% yield. **MP**: 174-175 °C; **<sup>1</sup>H NMR** (400 MHz, CDCl<sub>3</sub>): δ 8.04-7.96 (m, 2H), 7.92-7.85 (m, 2H), 7.70-7.51 (m, 6H), 7.11 (d, *J* = 0.7 Hz, 4H), 4.49-4.40 (m, 1H), 3.43-3.34 (m, 1H), 2.78-2.68 (m, 1H), 2.31 (s, 3H); **<sup>13</sup>C NMR** (101 MHz, CDCl<sub>3</sub>): δ 162.5, 137.3, 133.3 (d, *J* = 2.8 Hz), 133.2 (d, *J* = 2.9 Hz), 132.7 (d, *J* = 11.5 Hz), 132.5 (d, *J* = 9.0 Hz), 131.5 (d, *J* = 9.5 Hz), 129.6, 129.22 (d, *J* = 102.4 Hz), 129.18 (d, *J* = 12.2 Hz), 129.1, 129.0 (d, *J* = 12.1 Hz), 127.2 (d, *J* = 100.9 Hz), 56.1 (d, *J* = 70.8 Hz), 34.5, 21.2; **<sup>31</sup>P NMR** (162 MHz, CDCl<sub>3</sub>): δ 28.6; **HRMS** (ESI) *m/z*: [M+Na]<sup>+</sup> Calcd for C<sub>22</sub>H<sub>20</sub>NNaOP 368.1175; Found 368.1177.

**(2-(4-Chlorophenyl)-1-isocyanoethyl)diphenylphosphine oxide (2c)**

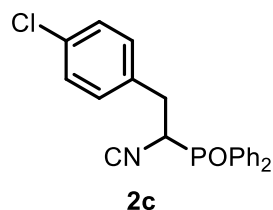

Purified by flash column chromatography (EtOAc). White solid, 200 mg, 55% yield.

**MP:** 140-141 °C; **<sup>1</sup>H NMR** (400 MHz, CDCl<sub>3</sub>): δ 7.98-7.92 (m, 2H), 7.87-7.81 (m, 2H), 7.67-7.48 (m, 6H), 7.25-7.21 (m, 2H), 7.14-7.10 (m, 2H), 4.44-4.36 (m, 1H), 3.39-3.31 (m, 1H), 2.76-2.66 (m, 1H); **<sup>13</sup>C NMR** (101 MHz, CDCl<sub>3</sub>): δ 162.9, 134.2 (d, *J* = 11.2 Hz), 133.7, 133.4 (d, *J* = 2.8 Hz), 133.3 (d, *J* = 2.9 Hz), 132.5 (d, *J* = 8.9 Hz), 131.5 (d, *J* = 9.5 Hz), 130.6, 129.3 (d, *J* = 12.3 Hz), 129.09, 129.06 (d, *J* = 12.3 Hz), 129.0 (d, *J* = 102.9 Hz), 127.0 (d, *J* = 101.1 Hz), 55.8 (d, *J* = 70.3 Hz), 34.3; **<sup>31</sup>P NMR** (162 MHz, CDCl<sub>3</sub>): δ 28.3; **HRMS** (ESI) *m/z*: [M+Na]<sup>+</sup> Calcd for C<sub>21</sub>H<sub>17</sub>ClNNaOP 388.0628; Found 388.0631.

**(1-Isocyano-2-(naphthalen-1-yl)ethyl)diphenylphosphine oxide (2d)**

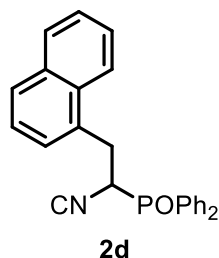

Purified by flash column chromatography (EtOAc). White solid, 200 mg, 53% yield.

**MP:** 170-171 °C; **<sup>1</sup>H NMR** (400 MHz, CDCl<sub>3</sub>): δ 8.10-8.04 (m, 2H), 7.94-7.83 (m, 4H), 7.80 (dd, *J* = 6.8, 2.7 Hz, 1H), 7.73-7.68 (m, 1H), 7.66-7.60 (m, 3H), 7.58-7.49 (m, 4H), 7.43-7.37 (m, 2H), 4.67-4.59 (m, 1H), 4.17-4.09 (m, 1H), 3.08-2.98 (m, 1H); **<sup>13</sup>C NMR** (101 MHz, CDCl<sub>3</sub>): δ 162.4, 134.1, 133.4 (d, *J* = 2.9 Hz), 133.3 (d, *J* = 2.9 Hz), 132.6 (d, *J* = 9.0 Hz), 131.6 (d, *J* = 9.5 Hz), 131.3 (d, *J* = 10.9 Hz), 131.2, 129.3 (d, *J* = 3.4 Hz), 129.18 (d, *J* = 102.5 Hz), 129.15, 129.0, 128.6 (d, *J* = 9.3 Hz), 127.2 (d, *J* = 100.7 Hz), 126.9, 126.0, 125.6, 122.8, 54.8 (d, *J* = 70.5 Hz), 32.5; **<sup>31</sup>P NMR** (162 MHz, CDCl<sub>3</sub>): δ 28.9; **HRMS** (ESI) *m/z*: [M+Na]<sup>+</sup> Calcd for C<sub>25</sub>H<sub>20</sub>NNaOP

404.1175; Found 404.1175.

**(1-Isocyano-2-(5-(trifluoromethyl)furan-2-yl)ethyl)diphenylphosphine oxide (2e)**

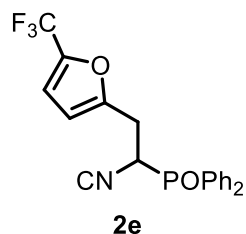

Purified by flash column chromatography (EtOAc). Yellow wax, 150 mg, 39% yield.  $^1\text{H NMR}$  (400 MHz,  $\text{CDCl}_3$ ):  $\delta$  8.00-7.94 (m, 2H), 7.91-7.85 (m, 2H), 7.70-7.53 (m, 6H), 6.68-6.65 (m, 1H), 6.29 (dd,  $J = 3.4, 1.0$  Hz, 1H), 4.70-4.63 (m, 1H), 3.49-3.39 (m, 1H), 3.08-2.98 (m, 1H);  $^{13}\text{C NMR}$  (101 MHz,  $\text{CDCl}_3$ ):  $\delta$  163.2, 151.9 (d,  $J = 12.0$  Hz), 141.9 (q,  $J = 42.7$  Hz), 133.6 (d,  $J = 2.9$  Hz), 133.5 (d,  $J = 2.8$  Hz), 132.4 (d,  $J = 9.2$  Hz), 131.5 (d,  $J = 9.6$  Hz), 129.4 (d,  $J = 12.4$  Hz), 129.2 (d,  $J = 12.4$  Hz), 128.1, 126.8 (d,  $J = 101.8$  Hz), 119.0 (q,  $J = 267.0$  Hz), 112.7 (q,  $J = 3.0$  Hz), 110.0, 52.6 (d,  $J = 70.0$  Hz), 28.3;  $^{19}\text{F NMR}$  (376 MHz,  $\text{CDCl}_3$ ):  $\delta$  -64.0;  $^{31}\text{P NMR}$  (162 MHz,  $\text{CDCl}_3$ ):  $\delta$  28.0; **HRMS** (ESI)  $m/z$ :  $[\text{M}+\text{Na}]^+$  Calcd for  $\text{C}_{20}\text{H}_{15}\text{F}_3\text{NNaO}_2\text{P}$  412.0685; Found 412.0687.

**(1-Isocyanoethyl)diphenylphosphine oxide (2f)**

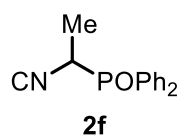

Purified by flash column chromatography (PE/EtOAc 1:1). White solid, 200 mg, 78% yield. **MP**: 159-160 °C;  $^1\text{H NMR}$  (400 MHz,  $\text{CDCl}_3$ ):  $\delta$  7.98-7.91 (m, 2H), 7.89-7.82 (m, 2H), 7.68-7.50 (m, 6H), 4.48-4.38 (m, 1H), 1.60 (dd,  $J = 13.4, 7.1$  Hz, 3H);  $^{13}\text{C NMR}$  (101 MHz,  $\text{CDCl}_3$ ):  $\delta$  161.2, 133.3 (d,  $J = 2.9$  Hz), 133.2 (d,  $J = 2.9$  Hz), 132.5 (d,  $J = 8.7$  Hz), 131.6 (d,  $J = 9.6$  Hz), 129.18 (d,  $J = 102.2$  Hz), 129.16 (d,  $J = 12.3$  Hz), 128.9 (d,  $J = 12.2$  Hz), 126.9 (d,  $J = 101.1$  Hz), 48.6 (d,  $J = 73.3$  Hz), 15.4;  $^{31}\text{P NMR}$  (162 MHz,  $\text{CDCl}_3$ ):  $\delta$  29.6; **HRMS** (ESI)  $m/z$ :  $[\text{M}+\text{Na}]^+$  Calcd for  $\text{C}_{15}\text{H}_{14}\text{NNaOP}$  278.0705; Found 278.0706.

### III. Metal salt and solvent screening<sup>a</sup>

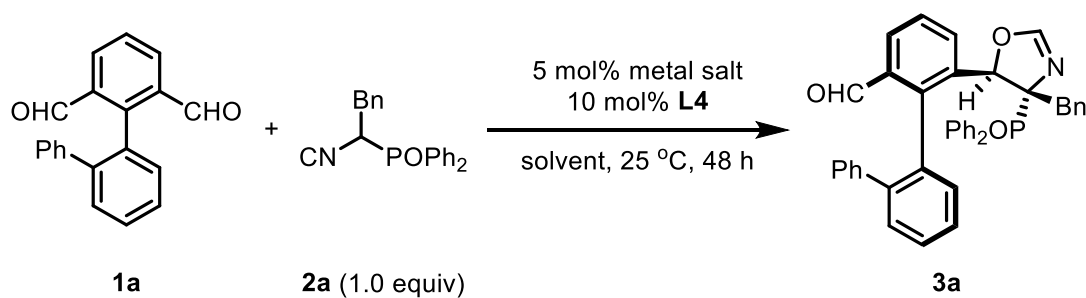

| Entry | Metal salt                      | Solvent                         | dr ( <b>3a</b> / <b>3a'</b> ) <sup>b</sup> | Yield (%) <sup>c</sup> | er <sup>d</sup> |
|-------|---------------------------------|---------------------------------|--------------------------------------------|------------------------|-----------------|
| 1     | Ag <sub>2</sub> CO <sub>3</sub> | EtOAc                           | 8:1                                        | 68                     | 99:1            |
| 2     | AgOAc                           | EtOAc                           | 9:1                                        | 36                     | 99:1            |
| 3     | Cu(OAc) <sub>2</sub>            | EtOAc                           | /                                          | <5                     | /               |
| 4     | Cu <sub>2</sub> O               | EtOAc                           | /                                          | <5                     | /               |
| 5     | Ag <sub>2</sub> O               | THF                             | 9:1                                        | 50                     | 99:1            |
| 6     | Ag <sub>2</sub> O               | CH <sub>2</sub> Cl <sub>2</sub> | 8:1                                        | 56                     | 99:1            |
| 7     | Ag <sub>2</sub> O               | DCE                             | 8:1                                        | 53                     | 99:1            |
| 8     | Ag <sub>2</sub> O               | toluene                         | 9:1                                        | 65                     | 99:1            |

<sup>a</sup> Reaction conditions: **1a** (0.1 mmol), **2a** (0.1 mmol), metal salt (5 mol%), and **L4** (10 mol%) in 1.0 mL of solvent at 25 °C for 48 h. <sup>b</sup> Determined by crude <sup>1</sup>H NMR. <sup>c</sup> Isolated yields. <sup>d</sup> Determined by chiral HPLC.

### IV. Silver-catalyzed desymmetric [3+2] cycloaddition reaction

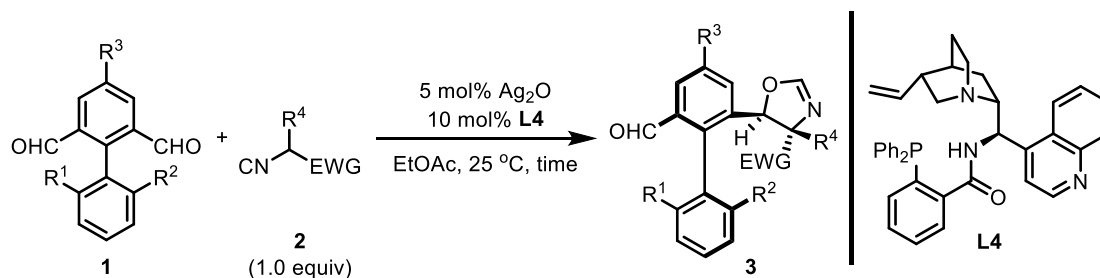

**General procedure.** To a 10 mL vial charged with **L4** (5.81 mg, 0.010 mmol, 10 mol%) and Ag<sub>2</sub>O (1.16 mg, 0.005 mmol, 5 mol%) was added anhydrous EtOAc (1.0 mL, 0.1 M). The mixture was stirred at ambient temperature for 5 min, then prochiral biaryl dialdehyde **1** (0.10 mmol) and activated isocyanide **2** (0.10 mmol) were added

successively in one portion. The reaction mixture was stirred at 25 °C for the given time, then concentrated and purified by flash column chromatography to afford **3**.

## V. Characterization of compounds **3**

**(S)-6-((4*R*,5*R*)-4-benzyl-4-(diphenylphosphoryl)-4,5-dihydrooxazol-5-yl)-[1,1':2',1''-terphenyl]-2-carbaldehyde (**3a**)**

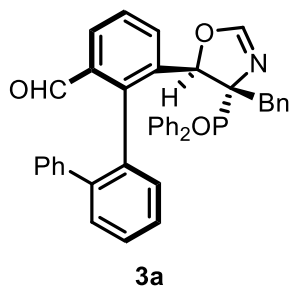

With **2a** (1.0 equiv) for 48 h. 8:1 dr (determined by crude  $^1\text{H}$  NMR). The crude reaction mixture was purified by flash column chromatography (PE/EtOAc 4:1). White solid, 46.9 mg, 76% yield. **MP**: 227-228 °C;  **$^1\text{H}$  NMR** (400 MHz, DMSO- $d_6$ ):  $\delta$  9.66 (s, 1H), 7.84-7.75 (m, 4H), 7.73-7.65 (m, 2H), 7.55-7.45 (m, 3H), 7.40-7.15 (m, 9H), 7.06-6.95 (m, 5H), 6.84-6.76 (m, 3H), 6.69-6.64 (m, 2H), 5.58 (d,  $J = 19.2$  Hz, 1H), 2.94 (dd,  $J = 14.1, 7.3$  Hz, 1H), 2.81 (dd,  $J = 20.7, 14.1$  Hz, 1H);  **$^{13}\text{C}$  NMR** (101 MHz, DMSO- $d_6$ ):  $\delta$  191.4, 157.1 (d,  $J = 7.7$  Hz), 143.1, 140.6, 139.9, 135.2 (d,  $J = 4.5$  Hz), 135.1, 134.1 (d,  $J = 7.6$  Hz), 133.2, 132.5, 132.0 (d,  $J = 7.7$  Hz), 131.8, 131.6, 131.53, 131.45, 131.1, 130.8, 130.5, 129.6, 129.0, 128.6, 128.5, 128.0 (d,  $J = 10.8$  Hz), 127.7, 127.6 (d,  $J = 11.5$  Hz), 127.4, 126.9, 126.8, 126.1, 79.9 (d,  $J = 7.7$  Hz), 78.9 (d,  $J = 81.0$  Hz);  **$^{31}\text{P}$  NMR** (162 MHz, DMSO- $d_6$ ):  $\delta$  26.9; **HRMS** (ESI)  $m/z$ :  $[\text{M}+\text{Na}]^+$  Calcd for  $\text{C}_{41}\text{H}_{32}\text{NNaO}_3\text{P}$  640.2012; Found 640.2026. **Optical Rotation**:  $[\alpha]^{20}_{\text{D}} = +128.4$  ( $c = 0.1$ ,  $\text{CH}_2\text{Cl}_2$ ). 99:1 er (HPLC condition: Chiralpak IF column, *n*-hexane/*i*-PrOH = 80:20, flow rate = 1 mL/min, wavelength = 254 nm,  $t_{\text{R}} = 18.1$  min for major isomer,  $t_{\text{R}} = 37.1$  min for minor isomer).



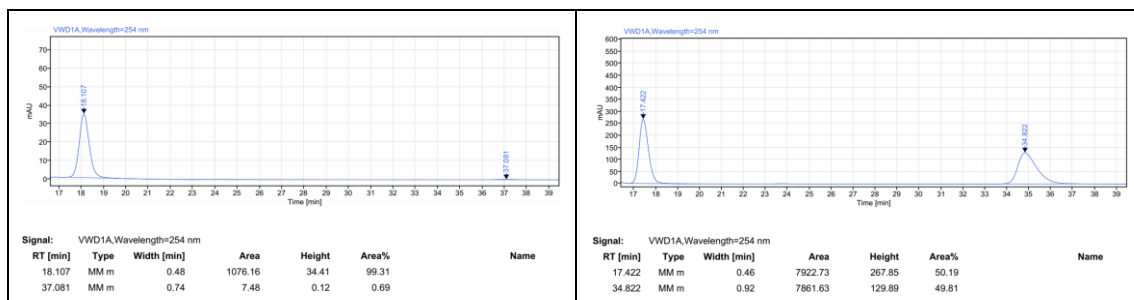

**(S)-6-((4S,5R)-4-benzyl-4-(diphenylphosphoryl)-4,5-dihydrooxazol-5-yl)-[1,1':2',1''-terphenyl]-2-carbaldehyde (3a')**

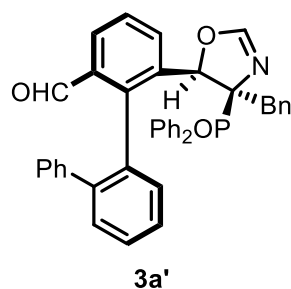

The crude reaction mixture was purified by flash column chromatography (PE/EtOAc 4:1). White solid, 5.9 mg, 10% yield. **MP**: 137-138 °C; **<sup>1</sup>H NMR** (400 MHz, CDCl<sub>3</sub>): δ 9.67 (s, 1H), 8.62 (d, *J* = 7.5 Hz, 1H), 8.33-8.24 (m, 2H), 7.77-7.66 (m, 4H), 7.60 (dd, *J* = 7.6, 1.3 Hz, 1H), 7.53 (dd, *J* = 7.7, 1.4 Hz, 1H), 7.49-7.40 (m, 4H), 7.30-7.24 (m, 2H), 7.19-7.08 (m, 3H), 7.01-6.90 (m, 4H), 6.68-6.63 (m, 2H), 6.45 (t, *J* = 7.7 Hz, 1H), 6.40-6.35 (m, 2H), 6.21 (dd, *J* = 7.8, 1.4 Hz, 1H), 5.50 (d, *J* = 13.9 Hz, 1H), 3.04-2.91 (m, 2H); **<sup>13</sup>C NMR** (101 MHz, CDCl<sub>3</sub>): δ 192.2, 155.8 (d, *J* = 13.6 Hz), 144.2, 142.4, 140.2, 134.9 (d, *J* = 6.2 Hz), 134.1 (d, *J* = 7.8 Hz), 133.9 (d, *J* = 12.6 Hz), 133.3 (d, *J* = 6.2 Hz), 133.0 (d, *J* = 16.0 Hz), 132.4 (d, *J* = 7.8 Hz), 132.0, 131.9, 131.6, 131.4, 130.0, 129.2, 128.7, 128.6, 128.5, 128.2, 128.1, 128.0, 127.84, 127.79, 127.1, 126.8, 126.7, 126.4, 81.4 (d, *J* = 4.2 Hz), 78.5 (d, *J* = 87.0 Hz), 40.5 (d, *J* = 5.8 Hz); **<sup>31</sup>P NMR** (162 MHz, CDCl<sub>3</sub>): δ 24.3; **HRMS** (ESI) *m/z*: [M+K]<sup>+</sup> Calcd for C<sub>41</sub>H<sub>32</sub>KNO<sub>3</sub>P 656.1751; Found 656.1755. **Optical Rotation**: [α]<sub>D</sub><sup>20</sup> = -52.9 (c = 0.4, CH<sub>2</sub>Cl<sub>2</sub>). 97:3 er (HPLC condition: Chiralpak IA column, *n*-hexane/*i*-PrOH = 90:10, flow rate = 1 mL/min, wavelength = 254 nm, *t<sub>R</sub>* = 22.0 min for minor isomer, *t<sub>R</sub>* = 23.7 min for major isomer).

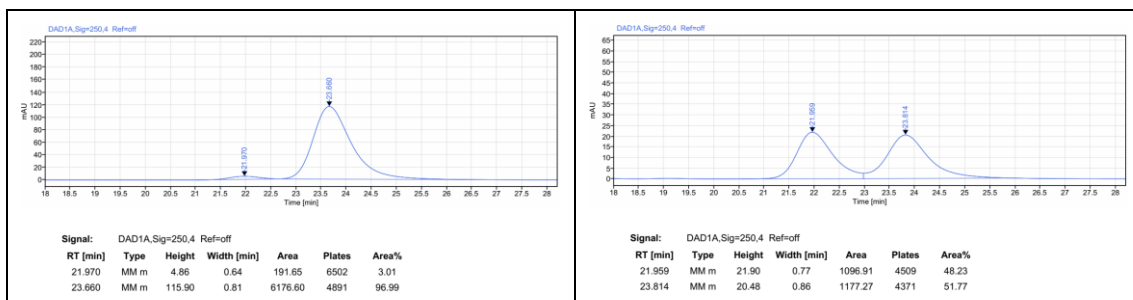

**(R)-6-((4S,5S)-4-benzyl-4-(diphenylphosphoryl)-4,5-dihydrooxazol-5-yl)-[1,1':2',1''-terphenyl]-2-carbaldehyde (ent-3a)**

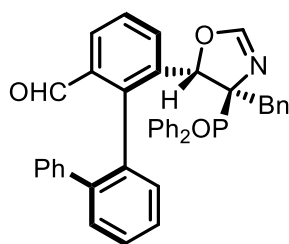

**ent-3a**

With **2a** (1.0 equiv) and **L6** for 48 h. 8:1 dr (determined by crude  $^1\text{H}$  NMR). The crude reaction mixture was purified by flash column chromatography (PE/EtOAc 4:1). White solid, 43.8 mg, 71% yield. **Optical Rotation:**  $[\alpha]^{20}_{\text{D}} = -126.1$  ( $c = 0.1$ ,  $\text{CH}_2\text{Cl}_2$ ). 99:1 er (HPLC condition: Chiralpak IF column,  $n$ -hexane/ $i$ -PrOH = 80:20, flow rate = 1 mL/min, wavelength = 254 nm,  $t_{\text{R}} = 18.2$  min for minor isomer,  $t_{\text{R}} = 36.1$  min for major isomer).

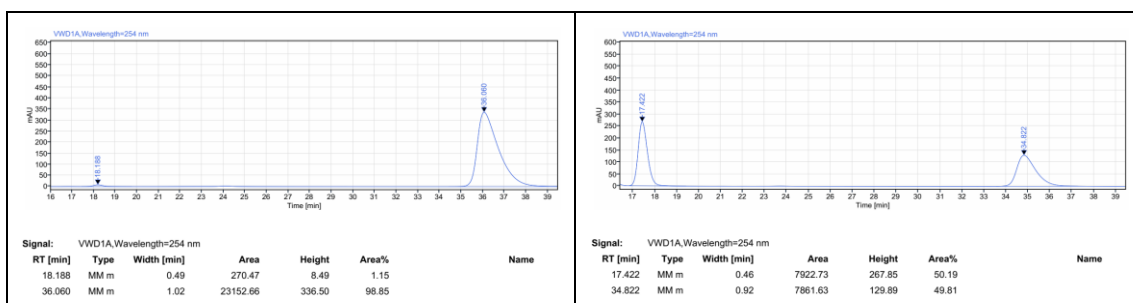

**(S)-6-((4R,5R)-4-benzyl-4-(diphenylphosphoryl)-4,5-dihydrooxazol-5-yl)-2'-isopropyl-[1,1'-biphenyl]-2-carbaldehyde (3b)**

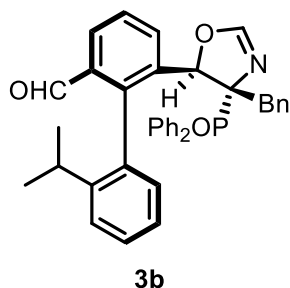

With **2a** (1.0 equiv) for 24 h. 4:1 dr (determined by crude  $^1\text{H NMR}$ ). The crude reaction mixture was purified by flash column chromatography (PE/EtOAc 4:1). White wax, 32.2 mg, 55% yield.  $^1\text{H NMR}$  (400 MHz,  $\text{DMSO-}d_6$ ):  $\delta$  9.52 (s, 1H), 7.89 (dd,  $J = 7.2, 1.7$  Hz, 1H), 7.82-7.75 (m, 2H), 7.71-7.65 (m, 1H), 7.61-7.52 (m, 3H), 7.51-7.38 (m, 4H), 7.30-7.22 (m, 3H), 7.19-7.13 (m, 2H), 7.08-7.00 (m, 4H), 6.84-6.77 (m, 3H), 5.52 (d,  $J = 19.4$  Hz, 1H), 2.97-2.84 (m, 2H), 2.20-2.08 (m, 1H), 0.84 (d,  $J = 6.9$  Hz, 3H), 0.74 (d,  $J = 6.9$  Hz, 3H);  $^{13}\text{C NMR}$  (101 MHz,  $\text{DMSO-}d_6$ ):  $\delta$  191.3, 157.0 (d,  $J = 7.7$  Hz), 145.7, 143.6, 135.4 (d,  $J = 11.2$  Hz), 135.2 (d,  $J = 4.8$  Hz), 134.6, 134.0, 132.4, 132.0, 131.8 (d,  $J = 7.7$  Hz), 131.5 (d,  $J = 6.5$  Hz), 131.4 (d,  $J = 6.8$  Hz), 131.2, 130.7, 130.3, 129.4, 129.1, 128.0, 127.9, 127.6, 127.5, 126.9, 126.7, 126.1, 125.3, 79.7 (d,  $J = 7.6$  Hz), 78.8 (d,  $J = 81.2$  Hz), 29.6, 23.8, 22.5;  $^{31}\text{P NMR}$  (162 MHz,  $\text{DMSO-}d_6$ ):  $\delta$  26.9; **HRMS** (ESI)  $m/z$ :  $[\text{M}+\text{Na}]^+$  Calcd for  $\text{C}_{38}\text{H}_{34}\text{NNaO}_3\text{P}$  606.2169; Found 606.2164. **Optical Rotation**:  $[\alpha]_D^{20} = +147.4$  ( $c = 0.4$ ,  $\text{CH}_2\text{Cl}_2$ ). 97:3 er (HPLC condition: Chiralpak IA column,  $n$ -hexane/ $i$ -PrOH = 90:10, flow rate = 1 mL/min, wavelength = 254 nm,  $t_R = 30.6$  min for minor isomer,  $t_R = 35.9$  min for major isomer).

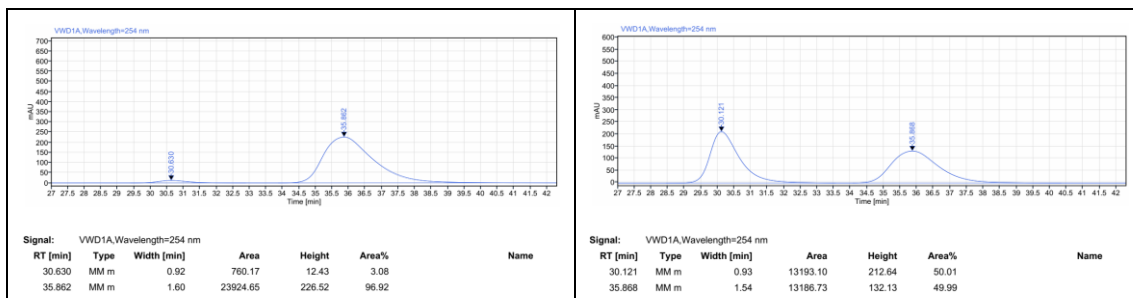

**(S)-6-((4R,5R)-4-benzyl-4-(diphenylphosphoryl)-4,5-dihydrooxazol-5-yl)-2'-vinyl-[1,1'-biphenyl]-2-carbaldehyde (3c)**

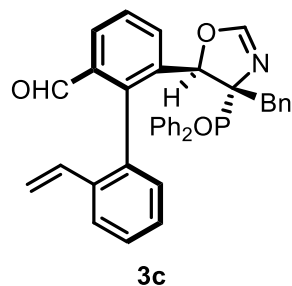

With **2a** (1.2 equiv) for 24 h. 4:1 dr (determined by crude  $^1\text{H}$  NMR). The crude reaction mixture was purified by preparative HPLC (gradient (0.1% HCOOH in  $\text{H}_2\text{O}/\text{MeCN}$ ) 0 min; 40:60, 15 min; 0:100, 25 min; 0:100, 25.1 min; 40:60, 30 min; 40:60). White solid, 26.6 mg, 47% yield. **MP**: 170-171  $^\circ\text{C}$ ;  $^1\text{H}$  NMR (400 MHz,  $\text{CDCl}_3$ ):  $\delta$  9.61 (d,  $J = 0.8$  Hz, 1H), 8.00-7.93 (m, 3H), 7.85 (dd,  $J = 7.8, 1.5$  Hz, 1H), 7.79-7.67 (m, 2H), 7.54 (dd,  $J = 7.5, 1.5$  Hz, 1H), 7.42-7.36 (m, 1H), 7.30-7.22 (m, 6H), 7.20-7.14 (m, 3H), 7.02-6.97 (m, 2H), 6.92 (d,  $J = 3.7$  Hz, 1H), 6.88-6.81 (m, 3H), 6.11 (dd,  $J = 17.4, 11.0$  Hz, 1H), 5.73 (d,  $J = 19.1$  Hz, 1H), 5.61 (dd,  $J = 17.4, 1.2$  Hz, 1H), 5.04 (dd,  $J = 11.0, 1.1$  Hz, 1H), 3.18 (dd,  $J = 14.4, 8.0$  Hz, 1H), 2.94 (dd,  $J = 18.2, 14.4$  Hz, 1H);  $^{13}\text{C}$  NMR (101 MHz,  $\text{CDCl}_3$ ):  $\delta$  192.0, 156.0 (d,  $J = 7.5$  Hz), 143.4, 136.4, 135.7 (d,  $J = 11.6$  Hz), 135.5 (d,  $J = 6.2$  Hz), 134.7, 134.2, 134.0, 133.1, 132.5 (d,  $J = 8.0$  Hz), 132.24, 132.16 (d,  $J = 8.3$  Hz), 131.7 (d,  $J = 2.8$  Hz), 131.21, 131.16 (d,  $J = 2.8$  Hz), 131.0 (d,  $J = 95.3$  Hz), 129.5, 129.2 (d,  $J = 92.3$  Hz), 129.0, 128.0, 127.9, 127.80, 127.75, 127.4, 126.4, 125.3, 116.5, 80.7 (d,  $J = 6.8$  Hz), 79.4 (d,  $J = 80.3$  Hz), 38.6 (d,  $J = 3.3$  Hz);  $^{31}\text{P}$  NMR (162 MHz,  $\text{CDCl}_3$ ):  $\delta$  29.8; **HRMS** (ESI)  $m/z$ :  $[\text{M}+\text{Na}]^+$  Calcd for  $\text{C}_{37}\text{H}_{30}\text{NNaO}_3\text{P}$  590.1856; Found 590.1886. **Optical Rotation**:  $[\alpha]_D^{20} = +104.0$  ( $c = 0.1$ ,  $\text{CH}_2\text{Cl}_2$ ). 98:2 er (HPLC condition: Chiralpak IA column,  $n$ -hexane/ $i$ -PrOH = 90:10, flow rate = 1 mL/min, wavelength = 254 nm,  $t_R = 32.6$  min for major isomer,  $t_R = 55.9$  min for minor isomer).

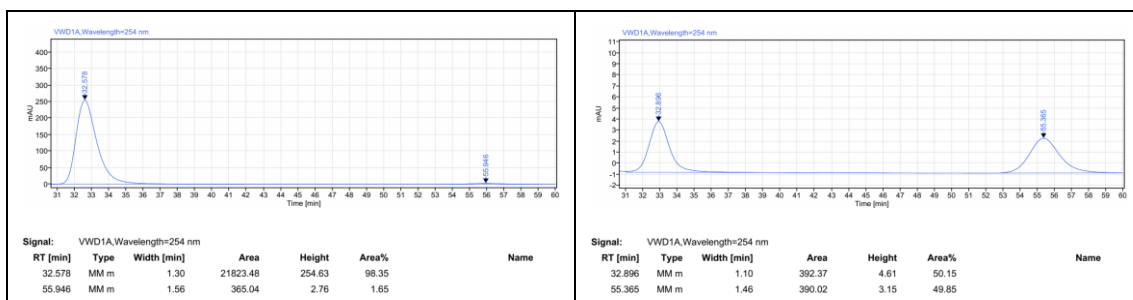

**(S)-6-((4R,5R)-4-benzyl-4-(diphenylphosphoryl)-4,5-dihydrooxazol-5-yl)-2'-bromo-[1,1'-biphenyl]-2-carbaldehyde (3d)**

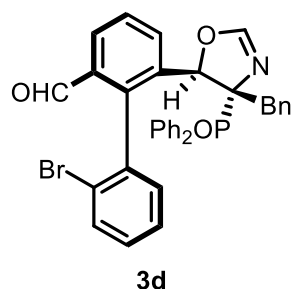

With **2a** (1.2 equiv) for 24 h. 4:1 dr (determined by crude  $^1\text{H}$  NMR). The crude reaction mixture was purified by preparative HPLC (gradient (0.1% HCOOH in  $\text{H}_2\text{O}/\text{MeCN}$ ) 0 min; 40:60, 15 min; 0:100, 25 min; 0:100, 25.1 min; 40:60, 30 min; 40:60). White solid, 24.4 mg, 39% yield. **MP**: 121-122 °C;  **$^1\text{H}$  NMR** (400 MHz,  $\text{CDCl}_3$ ):  $\delta$  9.60 (s, 1H), 8.01-7.94 (m, 3H), 7.89 (dd,  $J = 8.1, 1.2$  Hz, 1H), 7.85-7.80 (m, 1H), 7.65-7.56 (m, 2H), 7.46-7.40 (m, 1H), 7.34-7.24 (m, 6H), 7.22-7.15 (m, 3H), 7.01-6.96 (m, 2H), 6.93 (d,  $J = 3.7$  Hz, 1H), 6.89-6.81 (m, 3H), 5.76 (d,  $J = 19.1$  Hz, 1H), 3.17 (dd,  $J = 14.4, 8.0$  Hz, 1H), 2.94 (dd,  $J = 18.2, 14.5$  Hz, 1H);  **$^{13}\text{C}$  NMR** (101 MHz,  $\text{CDCl}_3$ ):  $\delta$  191.4, 156.0 (d,  $J = 7.7$  Hz), 143.3, 135.40 (d,  $J = 3.4$  Hz), 135.35, 135.3, 134.9, 134.5, 134.2, 132.6, 132.4 (d,  $J = 7.8$  Hz), 132.1 (d,  $J = 8.3$  Hz), 131.9 (d,  $J = 2.8$  Hz), 131.24, 131.20, 130.93 (d,  $J = 95.4$  Hz), 130.85, 129.1 (d,  $J = 92.4$  Hz), 128.7, 128.3, 128.2, 127.9 (d,  $J = 5.1$  Hz), 127.8 (d,  $J = 5.7$  Hz), 127.4, 126.5, 123.5, 80.9 (d,  $J = 6.8$  Hz), 79.4 (d,  $J = 80.3$  Hz), 38.7 (d,  $J = 3.2$  Hz);  **$^{31}\text{P}$  NMR** (162 MHz,  $\text{CDCl}_3$ ):  $\delta$  30.0; **HRMS** (ESI)  $m/z$ :  $[\text{M}+\text{Na}]^+$  Calcd for  $\text{C}_{35}\text{H}_{27}\text{BrNNaO}_3\text{P}$  642.0804; Found 642.0809. **Optical Rotation**:  $[\alpha]_D^{20} = +121.8$  ( $c = 0.5$ ,  $\text{CH}_2\text{Cl}_2$ ). 99:1 er (HPLC condition: Chiralpak IB N-5 column,  $n$ -hexane/ $i$ -PrOH = 90:10, flow rate = 1 mL/min, wavelength = 254 nm,  $t_R = 12.5$  min for major isomer,  $t_R = 15.4$  min for minor isomer).

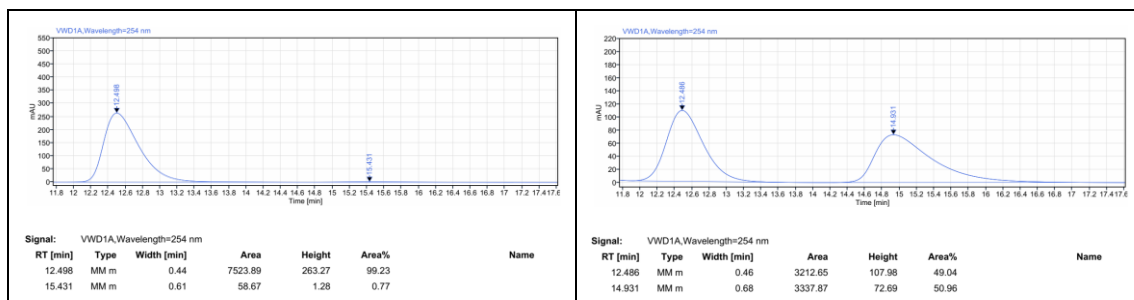

**(S)-6-((4*R*,5*R*)-4-benzyl-4-(diphenylphosphoryl)-4,5-dihydrooxazol-5-yl)-2'-(methylthio)-[1,1'-biphenyl]-2-carbaldehyde (3e)**

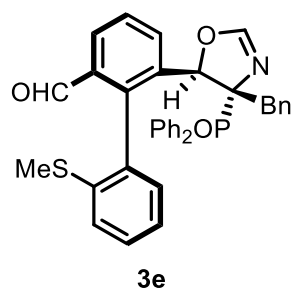

With **2a** (1.0 equiv) for 24 h. 5:1 dr (determined by crude  $^1\text{H NMR}$ ). The crude reaction mixture was purified by flash column chromatography (PE/EtOAc 4:1). White solid, 22.5 mg, 38% yield. **MP**: 124-125 °C;  $^1\text{H NMR}$  (400 MHz,  $\text{CDCl}_3$ ):  $\delta$  9.58 (s, 1H), 8.02-7.94 (m, 3H), 7.75-7.65 (m, 2H), 7.55 (dd,  $J = 7.2, 1.8$  Hz, 1H), 7.46-7.38 (m, 2H), 7.36-7.15 (m, 9H), 7.06-7.00 (m, 2H), 6.97 (d,  $J = 3.7$  Hz, 1H), 6.91-6.82 (m, 3H), 5.75 (d,  $J = 19.3$  Hz, 1H), 3.20 (dd,  $J = 14.4, 7.8$  Hz, 1H), 2.99 (dd,  $J = 18.8, 14.4$  Hz, 1H), 2.33 (s, 3H);  $^{13}\text{C NMR}$  (101 MHz,  $\text{CDCl}_3$ ):  $\delta$  192.0, 156.1 (d,  $J = 7.5$  Hz), 142.6, 137.9, 135.8 (d,  $J = 11.5$  Hz), 135.5 (d,  $J = 5.9$  Hz), 134.6, 134.3, 133.3, 132.5 (d,  $J = 7.9$  Hz), 132.2 (d,  $J = 8.3$  Hz), 131.8, 131.7 (d,  $J = 2.7$  Hz), 131.3, 131.2 (d,  $J = 95.3$  Hz), 131.1 (d,  $J = 2.9$  Hz), 129.9, 129.5 (d,  $J = 92.1$  Hz), 128.2, 128.0, 127.8 (d,  $J = 6.8$  Hz), 127.7 (d,  $J = 6.5$  Hz), 127.4, 126.5, 125.9, 124.0, 81.0 (d,  $J = 7.0$  Hz), 79.4 (d,  $J = 80.5$  Hz), 38.9 (d,  $J = 2.9$  Hz), 15.3;  $^{31}\text{P NMR}$  (162 MHz,  $\text{CDCl}_3$ ):  $\delta$  29.6; **HRMS** (ESI)  $m/z$ :  $[\text{M}+\text{Na}]^+$  Calcd for  $\text{C}_{36}\text{H}_{30}\text{NNaO}_3\text{PS}$  610.1576; Found 610.1578. **Optical Rotation**:  $[\alpha]_D^{20} = +149.4$  ( $c = 0.1$ ,  $\text{CH}_2\text{Cl}_2$ ). 99:1 er (HPLC condition: Chiralpak IA column,  $n$ -hexane/ $i$ -PrOH = 80:20, flow rate = 1 mL/min, wavelength = 254 nm,  $t_R = 20.0$  min for major isomer,  $t_R = 31.1$  min for minor

isomer).

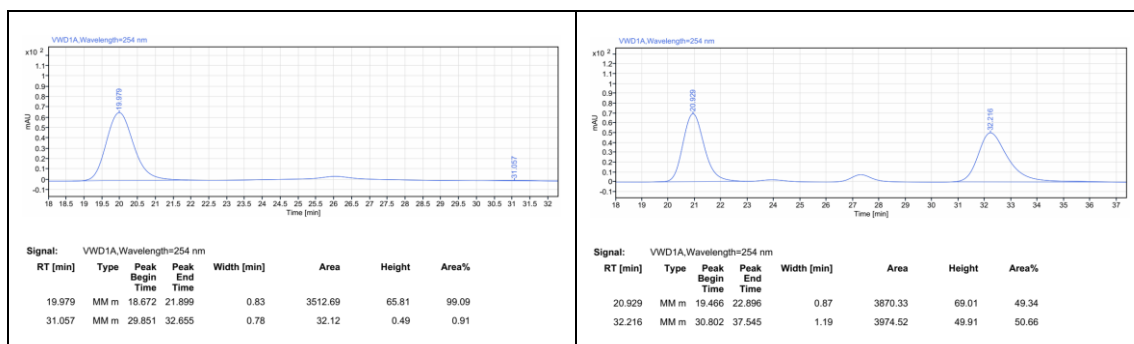

**(S)-3-((4R,5R)-4-benzyl-4-(diphenylphosphoryl)-4,5-dihydrooxazol-5-yl)-2-(naphthalen-1-yl)benzaldehyde (3f)**

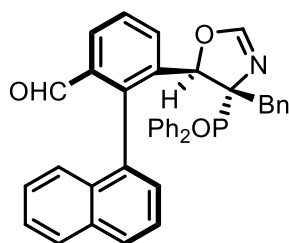

**3f**

With **2a** (1.0 equiv) for 48 h. 4:1 dr (determined by crude  $^1\text{H}$  NMR). The crude reaction mixture was purified by flash column chromatography (PE/EtOAc 4:1). White solid, 43.1 mg, 73% yield. **MP**: 118-119 °C;  $^1\text{H}$  NMR (400 MHz, DMSO- $d_6$ ):  $\delta$  9.42 (d,  $J = 0.7$  Hz, 1H), 8.31-8.23 (m, 2H), 7.95 (dd,  $J = 7.7, 1.4$  Hz, 1H), 7.88 (dd,  $J = 8.3, 7.0$  Hz, 1H), 7.80-7.73 (m, 3H), 7.69-7.64 (m, 1H), 7.54-7.48 (m, 1H), 7.44-7.35 (m, 3H), 7.31-7.13 (m, 4H), 7.03 (dd,  $J = 8.5, 1.1$  Hz, 1H), 6.98-6.94 (m, 2H), 6.92-6.86 (m, 2H), 6.85-6.78 (m, 3H), 6.63-6.56 (m, 2H), 5.39 (d,  $J = 19.3$  Hz, 1H), 2.98 (dd,  $J = 14.2, 7.4$  Hz, 1H), 2.81 (dd,  $J = 19.4, 14.1$  Hz, 1H);  $^{13}\text{C}$  NMR (101 MHz, DMSO- $d_6$ ):  $\delta$  191.3, 156.9 (d,  $J = 7.7$  Hz), 141.9, 136.3 (d,  $J = 11.5$  Hz), 135.2 (d,  $J = 5.6$  Hz), 134.8, 134.0, 133.3, 131.6, 131.51 (d,  $J = 93.7$  Hz), 131.49, 131.4 (d,  $J = 5.3$  Hz), 131.3, 131.0, 130.9, 130.3, 129.2 (d,  $J = 90.9$  Hz), 128.9, 128.7, 128.2, 127.7 (d,  $J = 3.5$  Hz), 127.6, 127.4 (d,  $J = 10.7$  Hz), 127.1, 126.9, 126.6, 126.1 (d,  $J = 8.7$  Hz), 124.4, 79.7 (d,  $J = 7.2$  Hz), 78.8 (d,  $J = 80.6$  Hz), 38.3;  $^{31}\text{P}$  NMR (162 MHz, DMSO- $d_6$ ):  $\delta$  27.3; **HRMS** (ESI)  $m/z$ :  $[\text{M}+\text{Na}]^+$  Calcd for  $\text{C}_{39}\text{H}_{30}\text{NNaO}_3\text{P}$  614.1856; Found 614.1859. **Optical Rotation**:  $[\alpha]_D^{20} = +61.8$  ( $c = 0.3$ ,  $\text{CH}_2\text{Cl}_2$ ). 99:1 er (HPLC

condition: Chiralpak IA column, *n*-hexane/*i*-PrOH = 90:10, flow rate = 1 mL/min, wavelength = 254 nm,  $t_R$  = 29.2 min for major isomer,  $t_R$  = 49.1 min for minor isomer).

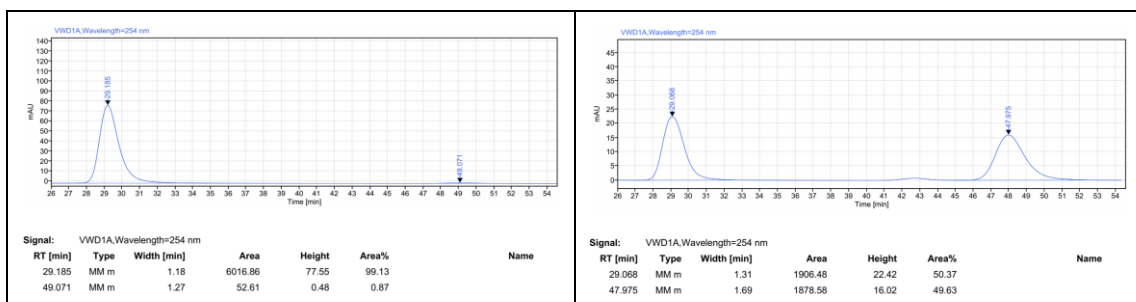

**(*S*)-3-((4*R*,5*R*)-4-benzyl-4-(diphenylphosphoryl)-4,5-dihydrooxazol-5-yl)-2-(4-methoxynaphthalen-1-yl)benzaldehyde (3g)**

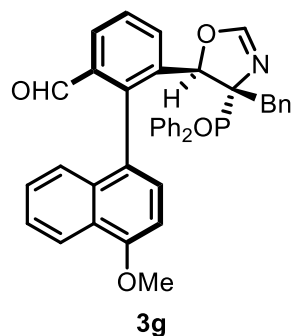

With **2a** (1.2 equiv) for 24 h. 5:1 dr (determined by crude  $^1\text{H}$  NMR). The crude reaction mixture was purified by preparative HPLC (gradient (0.1% HCOOH in  $\text{H}_2\text{O}/\text{MeCN}$ ) 0 min; 40:60, 15 min; 0:100, 25 min; 0:100, 25.1 min; 40:60, 30 min; 40:60). White solid, 38.4 mg, 62% yield. **MP**: 130-131 °C;  $^1\text{H}$  NMR (400 MHz,  $\text{CDCl}_3$ ):  $\delta$  9.54 (d,  $J$  = 0.8 Hz, 1H), 8.58-8.54 (m, 1H), 8.01 (dd,  $J$  = 7.6, 1.4 Hz, 1H), 7.93-7.86 (m, 2H), 7.67 (d,  $J$  = 7.9 Hz, 1H), 7.61-7.55 (m, 1H), 7.39-7.29 (m, 3H), 7.27-7.21 (m, 2H), 7.19-7.11 (m, 3H), 7.08-7.01 (m, 3H), 6.91-6.82 (m, 6H), 6.77-6.70 (m, 2H), 5.65 (d,  $J$  = 19.4 Hz, 1H), 4.23 (s, 3H), 3.20 (dd,  $J$  = 14.4, 7.6 Hz, 1H), 2.99 (dd,  $J$  = 18.7, 14.4 Hz, 1H);  $^{13}\text{C}$  NMR (101 MHz,  $\text{CDCl}_3$ ):  $\delta$  192.5, 156.4, 155.9 (d,  $J$  = 7.7 Hz), 143.3, 136.7 (d,  $J$  = 11.3 Hz), 135.9, 135.5 (d,  $J$  = 5.9 Hz), 134.1, 133.1, 132.2 (d,  $J$  = 8.4 Hz), 132.0, 131.9 (d,  $J$  = 4.0 Hz), 131.4 (d,  $J$  = 2.5 Hz), 131.3, 131.11 (d,  $J$  = 95.1 Hz), 131.09 (d,  $J$  = 2.9 Hz), 128.8 (d,  $J$  = 92.6 Hz), 128.0, 127.8 (d,  $J$  = 2.3 Hz), 127.7 (d,  $J$  = 3.3 Hz), 127.61, 127.55, 127.4, 126.5, 125.9,



125.6, 125.1, 122.9, 122.7, 104.5, 80.9 (d,  $J = 7.1$  Hz), 79.3 (d,  $J = 80.5$  Hz), 56.1, 38.7 (d,  $J = 3.0$  Hz);  $^{31}\text{P}$  NMR (162 MHz,  $\text{CDCl}_3$ ):  $\delta$  29.9; HRMS (ESI)  $m/z$ :  $[\text{M}+\text{Na}]^+$  Calcd for  $\text{C}_{40}\text{H}_{32}\text{NNaO}_4\text{P}$  644.1961; Found 644.1961. **Optical Rotation**:  $[\alpha]_D^{20} = +81.1$  ( $c = 0.4$ ,  $\text{CH}_2\text{Cl}_2$ ). 98:2 er (HPLC condition: Chiralpak IA column,  $n$ -hexane/ $i$ -PrOH = 80:20, flow rate = 1 mL/min, wavelength = 254 nm,  $t_R = 16.3$  min for minor isomer,  $t_R = 22.5$  min for major isomer).

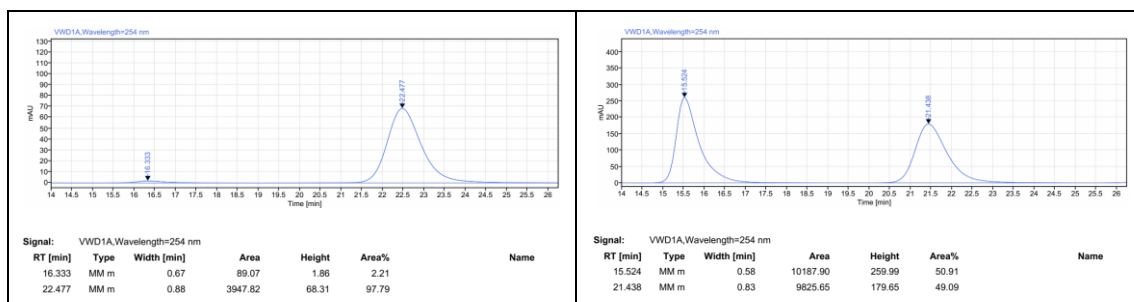

**(S)-3-(((4R,5R)-4-benzyl-4-(diphenylphosphoryl)-4,5-dihydrooxazol-5-yl)-2-(4-fluorophthalen-1-yl)benzaldehyde (3h)**

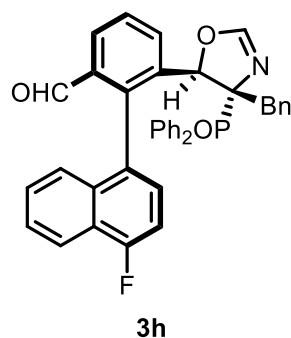

With **2a** (1.2 equiv) for 24 h. 5:1 dr (determined by crude  $^1\text{H}$  NMR). The crude reaction mixture was purified by preparative HPLC (gradient (0.1%  $\text{HCOOH}$  in  $\text{H}_2\text{O}/\text{MeCN}$ ) 0 min; 40:60, 15 min; 0:100, 25 min; 0:100, 25.1 min; 40:60, 30 min; 40:60). White solid, 34.7 mg, 57% yield. **MP**: 200-201  $^\circ\text{C}$ ;  $^1\text{H}$  NMR (400 MHz,  $\text{CDCl}_3$ ):  $\delta$  9.52 (s, 1H), 8.42 (d,  $J = 8.4$  Hz, 1H), 8.03 (dd,  $J = 7.7, 1.4$  Hz, 1H), 7.94-7.87 (m, 2H), 7.72-7.63 (m, 3H), 7.45-7.35 (m, 2H), 7.28-7.23 (m, 2H), 7.21-7.12 (m, 4H), 7.02-6.98 (m, 2H), 6.92-6.82 (m, 6H), 6.79-6.72 (m, 2H), 5.56 (d,  $J = 19.3$  Hz, 1H), 3.19 (dd,  $J = 14.4, 7.9$  Hz, 1H), 2.96 (dd,  $J = 18.3, 14.4$  Hz, 1H);  $^{13}\text{C}$  NMR (101 MHz,  $\text{CDCl}_3$ ):  $\delta$  191.8, 159.5 (d,  $J = 254.2$  Hz), 155.8 (d,  $J = 7.7$  Hz), 142.1, 136.6 (d,  $J = 11.4$  Hz), 135.6, 135.4 (d,  $J = 6.1$  Hz), 134.1, 133.5 (d,  $J = 4.8$

Hz), 132.1 (d,  $J = 8.5$  Hz), 131.9 (d,  $J = 8.2$  Hz), 131.6 (d,  $J = 8.9$  Hz), 131.4 (d,  $J = 2.8$  Hz), 131.23, 131.18 (d,  $J = 2.9$  Hz), 130.9 (d,  $J = 95.3$  Hz), 128.8 (d,  $J = 92.5$  Hz), 128.2, 127.9, 127.8, 127.6, 127.5, 127.4, 126.73 (d,  $J = 4.5$  Hz), 126.67, 126.5, 125.3 (d,  $J = 2.6$  Hz), 124.1 (d,  $J = 16.5$  Hz), 121.4 (d,  $J = 5.3$  Hz), 110.4 (d,  $J = 20.3$  Hz), 80.7 (d,  $J = 7.0$  Hz), 79.4 (d,  $J = 80.4$  Hz), 38.6 (d,  $J = 3.4$  Hz);  $^{19}\text{F}$  NMR (376 MHz,  $\text{CDCl}_3$ ):  $\delta$  -120.8;  $^{31}\text{P}$  NMR (162 MHz,  $\text{CDCl}_3$ ):  $\delta$  29.8; **HRMS** (ESI)  $m/z$ :  $[\text{M}+\text{Na}]^+$  Calcd for  $\text{C}_{39}\text{H}_{29}\text{FNNaO}_3\text{P}$  632.1761; Found 632.1759. **Optical Rotation**:  $[\alpha]_{\text{D}}^{20} = +53.0$  ( $c = 0.7$ ,  $\text{CH}_2\text{Cl}_2$ ). 99:1 er (HPLC condition: Chiralpak IA column,  $n$ -hexane/ $i$ -PrOH = 80:20, flow rate = 1 mL/min, wavelength = 254 nm,  $t_{\text{R}} = 15.1$  min for major isomer,  $t_{\text{R}} = 21.9$  min for minor isomer).

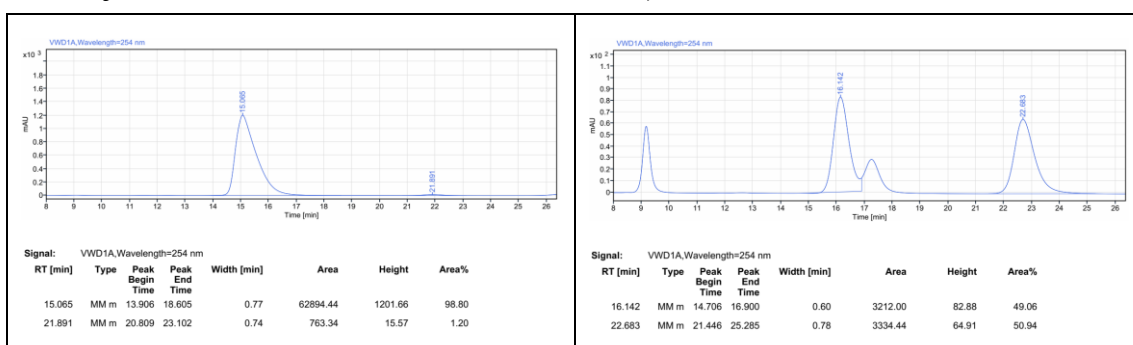

**(S)-3-((4R,5R)-4-benzyl-4-(diphenylphosphoryl)-4,5-dihydrooxazol-5-yl)-2-(phenanthren-9-yl)benzaldehyde (3i)**

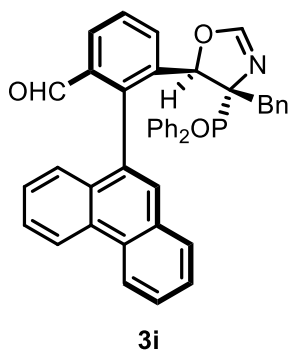

With **2a** (1.2 equiv) for 24 h. 4:1 dr (determined by crude  $^1\text{H}$  NMR). The crude reaction mixture was purified by preparative HPLC (gradient (0.1%  $\text{HCOOH}$  in  $\text{H}_2\text{O}/\text{MeCN}$ ) 0 min; 40:60, 15 min; 0:100, 25 min; 0:100, 25.1 min; 40:60, 30 min; 40:60). White solid, 32.9 mg, 51% yield. **MP**: 155-156  $^\circ\text{C}$ ;  $^1\text{H}$  NMR (400 MHz,  $\text{CDCl}_3$ ):  $\delta$  9.62 (s, 1H), 9.00-8.95 (m, 1H), 8.91 (d,  $J = 8.1$  Hz, 1H), 8.23 (dd,  $J = 7.7$ ,

1.6 Hz, 1H), 8.08 (dd,  $J = 7.6, 1.5$  Hz, 1H), 8.00 (s, 1H), 7.87-7.74 (m, 5H), 7.48-7.38 (m, 2H), 7.33 (dd,  $J = 7.9, 1.5$  Hz, 1H), 7.24-7.18 (m, 2H), 7.16-7.08 (m, 3H), 7.05-7.01 (m, 2H), 6.95-6.79 (m, 6H), 6.69-6.63 (m, 2H), 5.72 (d,  $J = 19.2$  Hz, 1H), 3.28 (dd,  $J = 14.4, 8.3$  Hz, 1H), 3.06 (dd,  $J = 17.9, 14.4$  Hz, 1H);  $^{13}\text{C}$  NMR (101 MHz,  $\text{CDCl}_3$ ):  $\delta$  192.1, 155.7 (d,  $J = 7.7$  Hz), 142.9, 136.6 (d,  $J = 11.2$  Hz), 135.7, 135.6 (d,  $J = 6.0$  Hz), 134.3, 132.9, 132.2 (d,  $J = 8.5$  Hz), 131.9 (d,  $J = 8.1$  Hz), 131.6, 131.4, 131.32, 131.26 (d,  $J = 2.7$  Hz), 131.1 (d,  $J = 2.9$  Hz), 131.0 (d,  $J = 95.2$  Hz), 130.8, 130.6, 129.9, 129.3, 129.0 (d,  $J = 92.6$  Hz), 128.1 (d,  $J = 3.4$  Hz), 127.8, 127.7 (d,  $J = 2.8$  Hz), 127.6, 127.5, 127.4, 127.1, 126.5, 126.3, 123.4, 122.7, 81.0 (d,  $J = 7.1$  Hz), 79.3 (d,  $J = 80.3$  Hz), 38.6 (d,  $J = 3.3$  Hz);  $^{31}\text{P}$  NMR (162 MHz,  $\text{CDCl}_3$ ):  $\delta$  30.0; **HRMS** (ESI)  $m/z$ :  $[\text{M}+\text{H}]^+$  Calcd for  $\text{C}_{43}\text{H}_{33}\text{NO}_3\text{P}$  642.2193; Found 642.2198. **Optical Rotation**:  $[\alpha]_D^{20} = +59.7$  ( $c = 0.8, \text{CH}_2\text{Cl}_2$ ). 98:2 er (HPLC condition: Chiralpak IA column,  $n$ -hexane/ $i$ -PrOH = 80:20, flow rate = 1 mL/min, wavelength = 254 nm,  $t_R = 9.0$  min for major isomer,  $t_R = 12.3$  min for minor isomer).

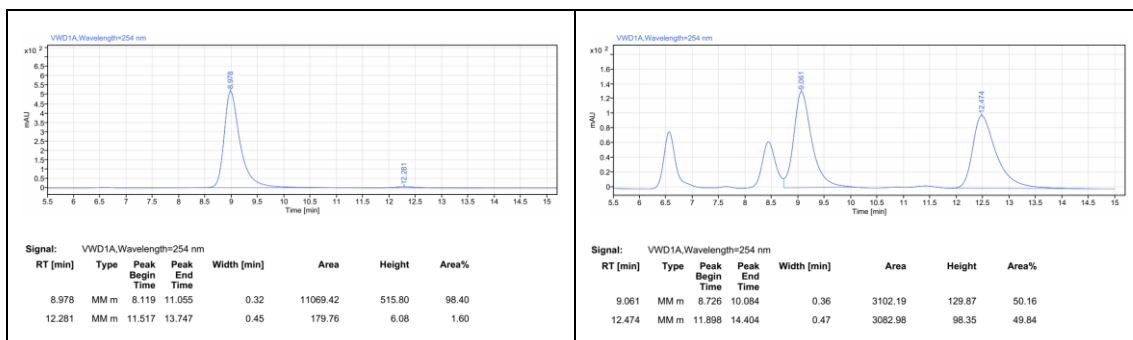

**(S)-3-((4R,5R)-4-benzyl-4-(diphenylphosphoryl)-4,5-dihydrooxazol-5-yl)-2-(pyren-1-yl)benzaldehyde (3j)**

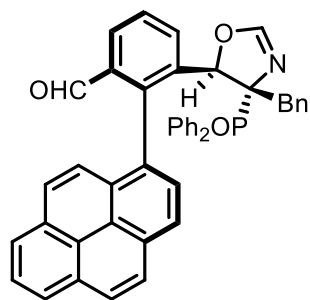

**3j**

With **2a** (1.2 equiv) for 24 h. 4:1 dr (determined by crude  $^1\text{H}$  NMR). The crude

reaction mixture was purified by preparative HPLC (gradient (0.1% HCOOH in H<sub>2</sub>O/MeCN) 0 min; 40:60, 15 min; 0:100, 25 min; 0:100, 25.1 min; 40:60, 30 min; 40:60). Yellow solid, 30.9 mg, 46% yield. **MP**: 158-159 °C; **<sup>1</sup>H NMR** (400 MHz, CDCl<sub>3</sub>): δ 9.53 (d, *J* = 0.8 Hz, 1H), 8.70 (d, *J* = 7.8 Hz, 1H), 8.39-8.33 (m, 2H), 8.27 (d, *J* = 8.3 Hz, 2H), 8.22 (dd, *J* = 7.7, 1.2 Hz, 1H), 8.15-8.10 (m, 2H), 7.93 (d, *J* = 9.2 Hz, 1H), 7.78-7.71 (m, 2H), 7.51-7.46 (m, 1H), 7.42-7.37 (m, 2H), 7.20-7.14 (m, 1H), 7.09-7.02 (m, 4H), 6.91 (d, *J* = 3.6 Hz, 1H), 6.89-6.82 (m, 3H), 6.76-6.70 (m, 1H), 6.31-6.24 (m, 2H), 6.09-6.03 (m, 2H), 5.60 (d, *J* = 19.5 Hz, 1H), 3.19 (dd, *J* = 14.3, 7.2 Hz, 1H), 3.01 (dd, *J* = 19.8, 14.4 Hz, 1H); **<sup>13</sup>C NMR** (101 MHz, CDCl<sub>3</sub>): δ 191.9, 155.9 (d, *J* = 7.7 Hz), 143.7, 136.5 (d, *J* = 11.4 Hz), 135.6, 135.4 (d, *J* = 5.5 Hz), 134.3, 132.0, 131.92, 131.89, 131.7, 131.5, 131.44, 131.41, 131.0, 130.9 (d, *J* = 3.2 Hz), 130.8, 130.7, 129.3, 129.2, 128.8, 128.4, 128.23, 128.20, 128.17, 128.1, 127.6 (d, *J* = 11.6 Hz), 127.4, 127.1 (d, *J* = 11.2 Hz), 126.6 (d, *J* = 3.8 Hz), 126.0, 125.8, 125.5, 124.8 (d, *J* = 9.9 Hz), 124.0, 81.0 (d, *J* = 7.5 Hz), 79.4 (d, *J* = 80.9 Hz), 39.2 (d, *J* = 2.8 Hz); **<sup>31</sup>P NMR** (162 MHz, CDCl<sub>3</sub>): δ 28.8; **HRMS** (ESI) *m/z*: [M+H]<sup>+</sup> Calcd for C<sub>45</sub>H<sub>33</sub>NO<sub>3</sub>P 666.2193; Found 666.2189. **Optical Rotation**: [α]<sub>D</sub><sup>20</sup> = -15.1 (c = 0.4, CH<sub>2</sub>Cl<sub>2</sub>). 99:1 er (HPLC condition: Chiralpak IA column, *n*-hexane/*i*-PrOH = 80:20, flow rate = 1 mL/min, wavelength = 254 nm, t<sub>R</sub> = 31.2 min for minor isomer, t<sub>R</sub> = 54.9 min for major isomer).

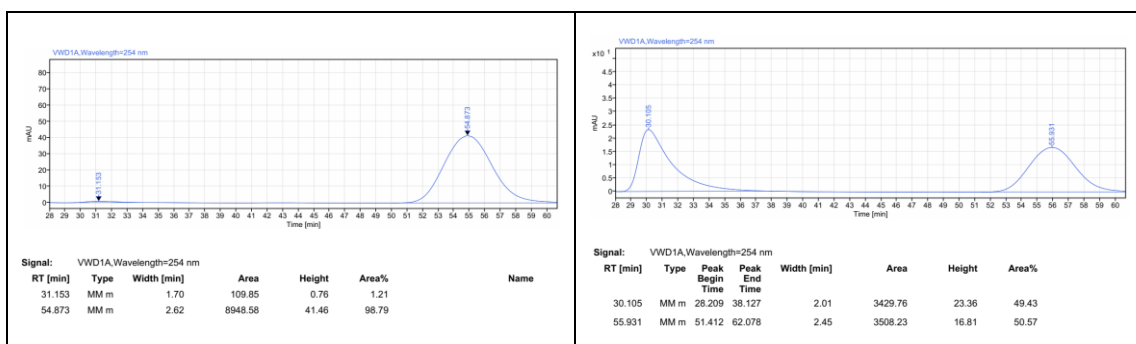

**(S)-6-((4R,5R)-4-benzyl-4-(diphenylphosphoryl)-4,5-dihydrooxazol-5-yl)-4-methoxy-[1,1':2',1''-terphenyl]-2-carbaldehyde (3k)**

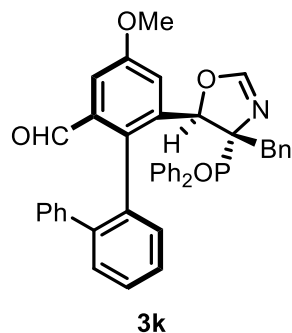

With **2a** (1.0 equiv) for 24 h. 4:1 dr (determined by crude  $^1\text{H}$  NMR). The crude reaction mixture was purified by flash column chromatography (PE/EtOAc 4:1). White solid, 27.0 mg, 42% yield. **MP**: 104-105 °C;  $^1\text{H}$  NMR (400 MHz,  $\text{CDCl}_3$ ):  $\delta$  9.76 (s, 1H), 8.01-7.94 (m, 2H), 7.90-7.85 (m, 1H), 7.79-7.70 (m, 2H), 7.55 (dd,  $J = 7.6, 1.4$  Hz, 1H), 7.46-7.41 (m, 1H), 7.35-7.25 (m, 6H), 7.21-7.15 (m, 2H), 7.08-6.97 (m, 5H), 6.90-6.82 (m, 4H), 6.74-6.70 (m, 2H), 6.51 (d,  $J = 2.8$  Hz, 1H), 5.72 (d,  $J = 19.2$  Hz, 1H), 3.66 (s, 3H), 3.20 (dd,  $J = 14.5, 8.2$  Hz, 1H), 3.00 (dd,  $J = 18.1, 14.5$  Hz, 1H);  $^{13}\text{C}$  NMR (101 MHz,  $\text{CDCl}_3$ ):  $\delta$  192.1, 158.5, 156.1 (d,  $J = 7.7$  Hz), 142.1, 140.4, 137.2, 136.8 (d,  $J = 11.6$  Hz), 135.8, 135.6 (d,  $J = 6.2$  Hz), 133.9, 132.6 (d,  $J = 7.9$  Hz), 132.2 (d,  $J = 8.5$  Hz), 132.0, 131.8 (d,  $J = 2.7$  Hz), 131.4 (d,  $J = 95.1$  Hz), 131.3, 131.2 (d,  $J = 2.9$  Hz), 130.1, 129.7 (d,  $J = 91.9$  Hz), 129.3, 129.1, 128.6, 128.0 (d,  $J = 11.1$  Hz), 127.9, 127.8, 127.3, 126.8, 126.4, 121.8, 110.6, 80.7 (d,  $J = 7.2$  Hz), 79.5 (d,  $J = 80.4$  Hz), 55.4, 38.7 (d,  $J = 3.0$  Hz);  $^{31}\text{P}$  NMR (162 MHz,  $\text{CDCl}_3$ ):  $\delta$  29.4; **HRMS** (ESI)  $m/z$ :  $[\text{M}+\text{Na}]^+$  Calcd for  $\text{C}_{42}\text{H}_{34}\text{NNaO}_4\text{P}$  670.2118; Found 670.2116. **Optical Rotation**:  $[\alpha]_D^{20} = +155.2$  ( $c = 0.2, \text{CH}_2\text{Cl}_2$ ). 96:4 er (HPLC condition: Chiralpak IB N-5 column,  $n$ -hexane/ $i$ -PrOH = 90:10, flow rate = 1 mL/min, wavelength = 254 nm,  $t_R = 9.9$  min for major isomer,  $t_R = 16.0$  min for minor isomer).

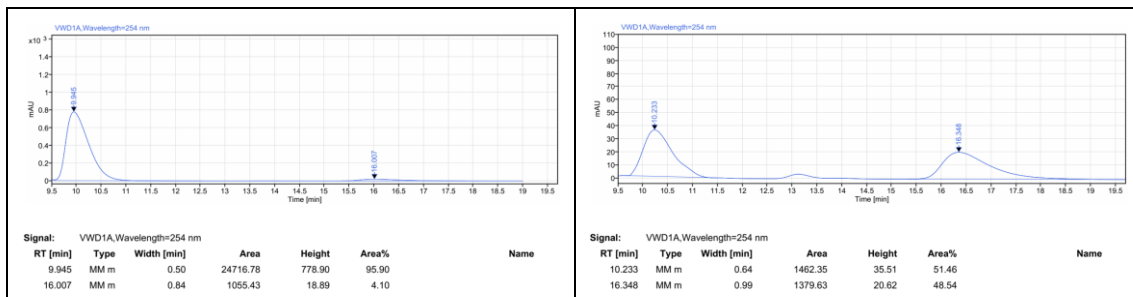

**(S)-3-((4R,5R)-4-benzyl-4-(diphenylphosphoryl)-4,5-dihydrooxazol-5-yl)-5-chloro**

### -2-(naphthalen-1-yl)benzaldehyde (31)

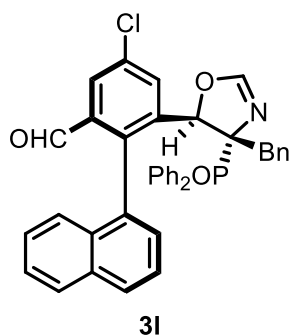

With **2a** (1.0 equiv) for 24 h. 1:1 dr (determined by crude  $^1\text{H}$  NMR). The crude reaction mixture was purified by flash column chromatography (PE/EtOAc 4:1). Yellow solid, 27.3 mg, 44% yield. **MP**: 119-120 °C;  $^1\text{H}$  NMR (400 MHz,  $\text{CDCl}_3$ ):  $\delta$  9.48 (s, 1H), 8.29-8.25 (m, 1H), 8.19-8.15 (m, 1H), 8.07-7.94 (m, 4H), 7.76 (dd,  $J = 7.0, 1.2$  Hz, 1H), 7.67-7.62 (m, 1H), 7.43-7.38 (m, 1H), 7.35-7.30 (m, 1H), 7.27-7.18 (m, 3H), 7.15 (dd,  $J = 8.5, 1.0$  Hz, 1H), 7.01-6.93 (m, 6H), 6.92-6.86 (m, 2H), 6.84 (d,  $J = 3.8$  Hz, 1H), 6.69-6.62 (m, 2H), 5.56 (d,  $J = 19.4$  Hz, 1H), 3.30 (dd,  $J = 14.7, 8.8$  Hz, 1H), 2.97 (dd,  $J = 14.7, 13.1$  Hz, 1H);  $^{13}\text{C}$  NMR (101 MHz,  $\text{CDCl}_3$ ):  $\delta$  190.8, 155.5 (d,  $J = 7.5$  Hz), 141.1, 138.6 (d,  $J = 11.9$  Hz), 136.4, 135.3 (d,  $J = 8.4$  Hz), 134.7, 134.1, 133.9, 132.5 (d,  $J = 8.4$  Hz), 132.1 (d,  $J = 7.8$  Hz), 131.9, 131.7, 131.58, 131.57 (d,  $J = 8.2$  Hz), 130.7, 129.92, 129.87, 129.8, 129.1, 128.2 (d,  $J = 92.4$  Hz), 128.1, 128.0 (d,  $J = 7.4$  Hz), 127.7, 127.6, 127.5, 127.0, 126.7, 126.5, 125.0, 79.9 (d,  $J = 7.1$  Hz), 79.4 (d,  $J = 79.3$  Hz), 37.6 (d,  $J = 3.5$  Hz);  $^{31}\text{P}$  NMR (162 MHz,  $\text{CDCl}_3$ ):  $\delta$  30.7; **HRMS** (ESI)  $m/z$ :  $[\text{M}+\text{Na}]^+$  Calcd for  $\text{C}_{39}\text{H}_{29}\text{ClINNaO}_3\text{P}$  648.1466; Found 648.1461. **Optical Rotation**:  $[\alpha]_D^{20} = +88.4$  ( $c = 0.1, \text{CH}_2\text{Cl}_2$ ). 95:5 er (HPLC condition: Chiralpak IB N-5 column,  $n$ -hexane/ $i$ -PrOH = 90:10, flow rate = 1 mL/min, wavelength = 254 nm,  $t_R = 9.5$  min for major isomer,  $t_R = 31.8$  min for minor isomer).

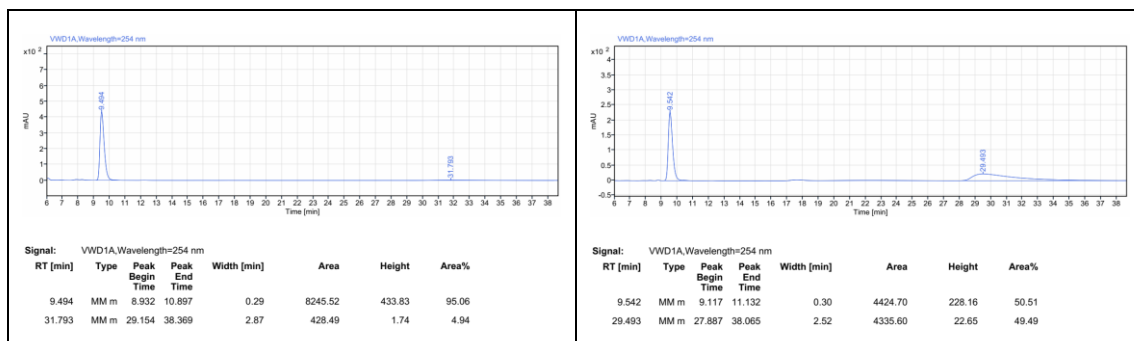

**(S)-3-((4S,5R)-4-benzyl-4-(diphenylphosphoryl)-4,5-dihydrooxazol-5-yl)-5-chloro-2-(naphthalen-1-yl)benzaldehyde (3I')**

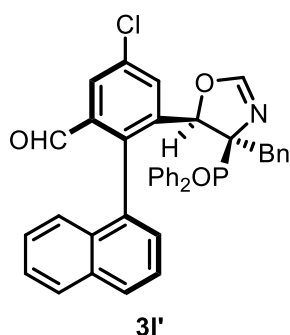

The crude reaction mixture was purified by flash column chromatography (PE/EtOAc 4:1). White solid, 20.9 mg, 33% yield. **MP**: 153-154 °C; **<sup>1</sup>H NMR** (400 MHz, CDCl<sub>3</sub>): δ 9.36 (s, 1H), 8.67 (dd, *J* = 7.1, 1.1 Hz, 1H), 8.32-8.25 (m, 2H), 8.14 (d, *J* = 8.3 Hz, 1H), 8.07 (d, *J* = 7.7 Hz, 1H), 7.90 (d, *J* = 2.3 Hz, 1H), 7.84 (dd, *J* = 8.3, 7.1 Hz, 1H), 7.80-7.74 (m, 2H), 7.58-7.39 (m, 7H), 7.35-7.30 (m, 1H), 6.96 (d, *J* = 8.5 Hz, 1H), 6.92-6.87 (m, 2H), 6.66 (t, *J* = 7.6 Hz, 2H), 6.46 (d, *J* = 2.3 Hz, 1H), 5.78-5.73 (m, 2H), 5.17 (d, *J* = 15.2 Hz, 1H), 2.85 (dd, *J* = 13.6, 6.3 Hz, 1H), 2.61 (dd, *J* = 13.6, 4.3 Hz, 1H); **<sup>13</sup>C NMR** (101 MHz, CDCl<sub>3</sub>): δ 190.9, 155.3 (d, *J* = 12.9 Hz), 141.9, 138.4 (d, *J* = 6.2 Hz), 136.0, 133.9, 133.8, 133.6, 133.3 (d, *J* = 96.4 Hz), 133.2, 133.0, 132.7, 132.3 (d, *J* = 3.0 Hz), 132.1, 132.0 (d, *J* = 5.7 Hz), 131.9, 131.7, 131.3, 130.9, 129.6, 128.7 (d, *J* = 3.3 Hz), 128.6, 128.4, 127.7, 127.5, 127.4, 126.8, 126.6, 125.8, 124.9, 80.8 (d, *J* = 3.8 Hz), 78.4 (d, *J* = 85.6 Hz), 40.1 (d, *J* = 5.5 Hz); **<sup>31</sup>P NMR** (162 MHz, CDCl<sub>3</sub>): δ 24.2; **HRMS** (ESI) *m/z*: [M+Na]<sup>+</sup> Calcd for C<sub>39</sub>H<sub>29</sub>ClNNaO<sub>3</sub>P 648.1466; Found 648.1468. **Optical Rotation**: [α]<sub>D</sub><sup>20</sup> = -61.7 (c = 0.3, CH<sub>2</sub>Cl<sub>2</sub>). 85:15 er (HPLC condition: Chiralpak IB N-5 column, *n*-hexane/*i*-PrOH = 90:10, flow rate = 1 mL/min, wavelength = 254 nm, *t*<sub>R</sub> = 6.1 min for major isomer, *t*<sub>R</sub> = 7.0 min for minor isomer).

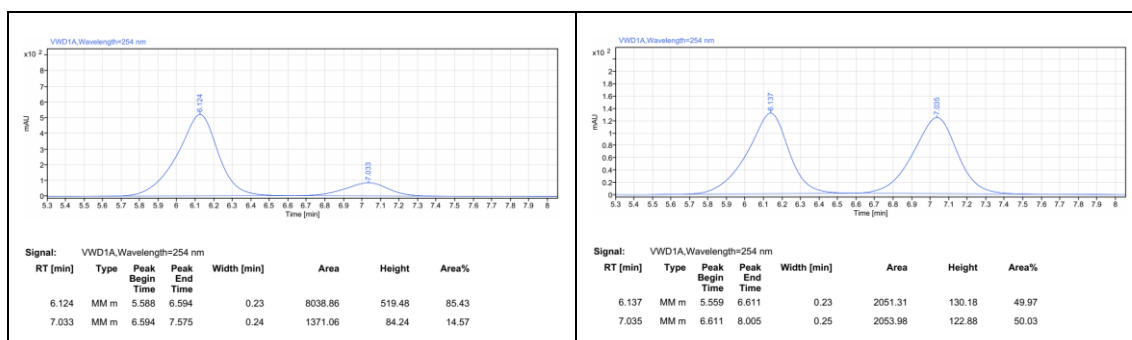

**(R)-6-((4R,5R)-4-benzyl-4-(diphenylphosphoryl)-4,5-dihydrooxazol-5-yl)-2'-fluoro-6'-methoxy-[1,1'-biphenyl]-2-carbaldehyde (3m)**

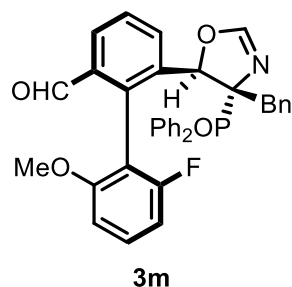

With **2a** (1.0 equiv) for 24 h. >20:1 dr (determined by crude  $^1\text{H}$  NMR). The crude reaction mixture was purified by flash column chromatography (PE/EtOAc 4:1). White solid, 44.7 mg, 76% yield. **MP**: 101-102 °C;  $^1\text{H}$  NMR (400 MHz, DMSO- $d_6$ ):  $\delta$  9.63 (s, 1H), 7.88 (dd,  $J = 7.6, 1.4$  Hz, 1H), 7.81-7.70 (m, 3H), 7.54-7.43 (m, 3H), 7.40-7.34 (m, 3H), 7.29-7.23 (m, 2H), 7.22-7.09 (m, 5H), 7.01-6.95 (m, 2H), 6.82-6.77 (m, 3H), 5.55 (d,  $J = 19.4$  Hz, 1H), 3.98 (s, 3H), 2.95 (dd,  $J = 14.1, 5.9$  Hz, 1H), 2.64 (dd,  $J = 21.2, 14.1$  Hz, 1H);  $^{13}\text{C}$  NMR (101 MHz, DMSO- $d_6$ ):  $\delta$  191.6, 159.4 (d,  $J = 6.5$  Hz), 158.7 (d,  $J = 241.0$  Hz), 157.0 (d,  $J = 7.7$  Hz), 136.2 (d,  $J = 11.3$  Hz), 135.4 (d,  $J = 5.4$  Hz), 134.1, 134.0, 133.8, 131.9 (d,  $J = 7.7$  Hz), 131.81 (d,  $J = 102.8$  Hz), 131.76, 131.5, 131.4, 131.0, 130.7, 129.8 (d,  $J = 90.6$  Hz), 128.4, 128.0, 127.9, 127.6 (d,  $J = 11.5$  Hz), 127.0, 126.1, 110.1 (d,  $J = 19.6$  Hz), 108.9, 107.3 (d,  $J = 21.9$  Hz), 80.0 (d,  $J = 7.3$  Hz), 79.2 (d,  $J = 80.9$  Hz), 56.2, 37.5;  $^{19}\text{F}$  NMR (376 MHz, DMSO- $d_6$ ):  $\delta$  -114.0;  $^{31}\text{P}$  NMR (162 MHz, DMSO- $d_6$ ):  $\delta$  26.9; **HRMS** (ESI)  $m/z$ :  $[\text{M}+\text{Na}]^+$  Calcd for  $\text{C}_{36}\text{H}_{29}\text{FNNaO}_4\text{P}$  612.1710; Found 612.1708. **Optical Rotation**:  $[\alpha]_D^{20} = +128.5$  ( $c = 0.3, \text{CH}_2\text{Cl}_2$ ). 99:1 er (HPLC condition: Chiralpak ID column,  $n$ -hexane/ $i$ -PrOH = 80:20, flow rate = 1 mL/min, wavelength = 254 nm,  $t_R = 13.4$  min for major isomer,  $t_R = 28.3$  min for minor isomer).

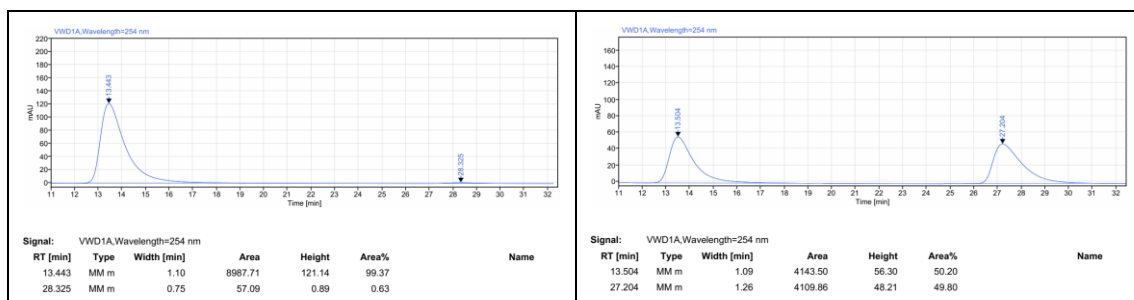



**(R)-3-((4R,5R)-4-benzyl-4-(diphenylphosphoryl)-4,5-dihydrooxazol-5-yl)-2-(2-ethoxynaphthalen-1-yl)benzaldehyde (3n)**

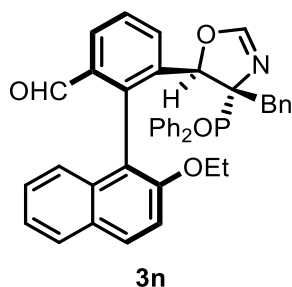

With **2a** (1.0 equiv) for 16 h. >20:1 dr (determined by crude  $^1\text{H}$  NMR). The crude reaction mixture was purified by flash column chromatography (PE/EtOAc 4:1). White solid, 48.0 mg, 76% yield. **MP**: 258-259 °C;  $^1\text{H}$  NMR (400 MHz,  $\text{CDCl}_3$ ):  $\delta$  9.63 (d,  $J = 0.8$  Hz, 1H), 8.27 (d,  $J = 9.1$  Hz, 1H), 8.09 (dd,  $J = 8.2, 1.3$  Hz, 1H), 8.04 (dd,  $J = 7.7, 1.4$  Hz, 1H), 7.99-7.92 (m, 2H), 7.74 (d,  $J = 9.2$  Hz, 1H), 7.49-7.44 (m, 1H), 7.33-7.24 (m, 3H), 7.21-7.11 (m, 4H), 7.02-6.96 (m, 3H), 6.90-6.83 (m, 6H), 6.68-6.61 (m, 2H), 5.56 (d,  $J = 19.6$  Hz, 1H), 4.58-4.48 (m, 1H), 4.42-4.32 (m, 1H), 3.26 (dd,  $J = 14.6, 8.0$  Hz, 1H), 2.95 (dd,  $J = 16.3, 14.5$  Hz, 1H), 1.29 (t,  $J = 7.0$  Hz, 3H);  $^{13}\text{C}$  NMR (101 MHz,  $\text{CDCl}_3$ ):  $\delta$  193.2, 156.2, 155.9 (d,  $J = 7.5$  Hz), 139.8, 136.8 (d,  $J = 11.7$  Hz), 136.0 (d,  $J = 7.2$  Hz), 135.0, 134.2, 133.1, 132.4 (d,  $J = 8.4$  Hz), 132.0 (d,  $J = 8.1$  Hz), 131.4, 131.3 (d,  $J = 2.7$  Hz), 131.2, 131.11 (d,  $J = 95.0$  Hz), 131.07 (d,  $J = 2.9$  Hz), 129.0, 128.8 (d,  $J = 91.7$  Hz), 128.6, 127.8, 127.7, 127.62, 127.56, 127.5, 127.4, 127.3, 126.2, 123.7 (d,  $J = 5.6$  Hz), 114.7, 80.7 (d,  $J = 6.7$  Hz), 79.5 (d,  $J = 80.0$  Hz), 64.2, 36.4 (d,  $J = 3.1$  Hz), 15.1;  $^{31}\text{P}$  NMR (162 MHz,  $\text{CDCl}_3$ ):  $\delta$  30.0; **HRMS** (ESI)  $m/z$ :  $[\text{M}+\text{Na}]^+$  Calcd for  $\text{C}_{41}\text{H}_{34}\text{NNaO}_4\text{P}$  658.2118; Found 658.2122. **Optical Rotation**:  $[\alpha]_D^{20} = +6.7$  ( $c = 0.1$ ,  $\text{CH}_2\text{Cl}_2$ ). 99:1 er (HPLC condition: Chiralpak IA column,  $n$ -hexane/ $i$ -PrOH = 80:20, flow rate = 1 mL/min, wavelength = 254 nm,  $t_R = 5.2$  min for major isomer,  $t_R = 6.7$  min for minor isomer).

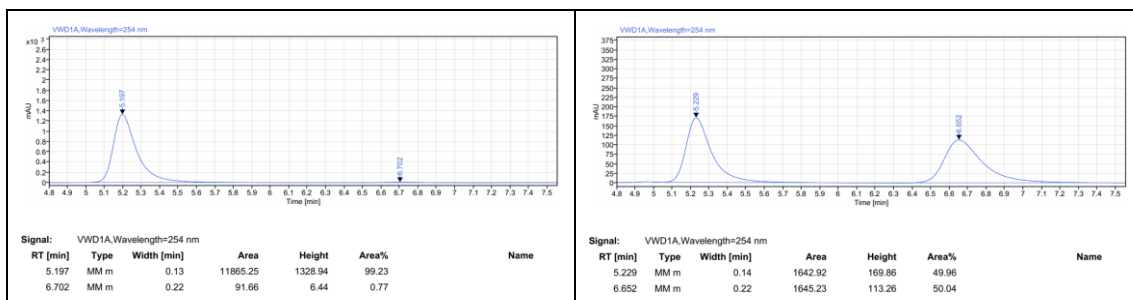

**(S)-6-((4R,5R)-4-(diphenylphosphoryl)-4-(4-methylbenzyl)-4,5-dihydrooxazol-5-yl)-[1,1':2',1''-terphenyl]-2-carbaldehyde (3o)**

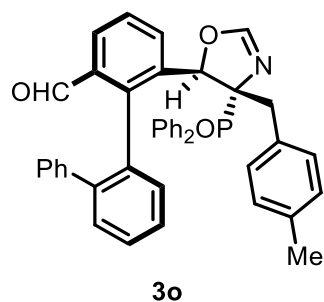

With **2b** (1.0 equiv) for 48 h. 7:1 dr (determined by crude  $^1\text{H}$  NMR). The crude reaction mixture was purified by flash column chromatography (PE/EtOAc 4:1). White solid, 34.7 mg, 55% yield. **MP**: 282-283 °C;  $^1\text{H}$  NMR (400 MHz,  $\text{CDCl}_3$ ):  $\delta$  9.72 (d,  $J = 0.8$  Hz, 1H), 7.88-7.81 (m, 3H), 7.77-7.66 (m, 3H), 7.49 (dd,  $J = 7.7, 1.3$  Hz, 1H), 7.39-7.33 (m, 1H), 7.25-7.17 (m, 5H), 7.14 (t,  $J = 7.7$  Hz, 1H), 7.10-7.04 (m, 3H), 7.01-6.90 (m, 3H), 6.88-6.84 (m, 3H), 6.67-6.63 (m, 2H), 6.55 (d,  $J = 7.8$  Hz, 2H), 5.71 (d,  $J = 19.3$  Hz, 1H), 3.04 (dd,  $J = 14.3, 7.3$  Hz, 1H), 2.87 (dd,  $J = 20.6, 14.3$  Hz, 1H), 2.02 (s, 3H);  $^{13}\text{C}$  NMR (101 MHz,  $\text{CDCl}_3$ ):  $\delta$  192.1, 156.1 (d,  $J = 7.7$  Hz), 144.2, 141.6, 140.2, 135.9, 135.4 (d,  $J = 11.3$  Hz), 134.7, 134.2, 133.4, 132.5 (d,  $J = 8.0$  Hz), 132.2, 132.1 (d,  $J = 10.4$  Hz), 132.0 (d,  $J = 8.3$  Hz), 131.6 (d,  $J = 2.7$  Hz), 131.5 (d,  $J = 95.4$  Hz), 131.3, 130.5 (d,  $J = 2.9$  Hz), 129.9, 129.8 (d,  $J = 91.8$  Hz), 129.3, 129.0, 128.6, 128.04, 128.01, 127.93, 127.85, 127.7, 127.5 (d,  $J = 10.6$  Hz), 126.8, 80.9 (d,  $J = 7.2$  Hz), 79.8 (d,  $J = 81.3$  Hz), 39.0 (d,  $J = 2.9$  Hz), 20.9;  $^{31}\text{P}$  NMR (162 MHz,  $\text{CDCl}_3$ ):  $\delta$  28.9; **HRMS** (ESI)  $m/z$ :  $[\text{M}+\text{H}]^+$  Calcd for  $\text{C}_{42}\text{H}_{35}\text{NO}_3\text{P}$  632.2349; Found 632.2355. **Optical Rotation**:  $[\alpha]_{\text{D}}^{20} = +128.7$  ( $c = 0.2, \text{CH}_2\text{Cl}_2$ ). 99:1 er (HPLC condition: Chiralpak IB N-5 column, *n*-hexane/*i*-PrOH = 95:5, flow

rate = 1 mL/min, wavelength = 254 nm,  $t_R$  = 14.1 min for major isomer,  $t_R$  = 27.9 min for minor isomer).

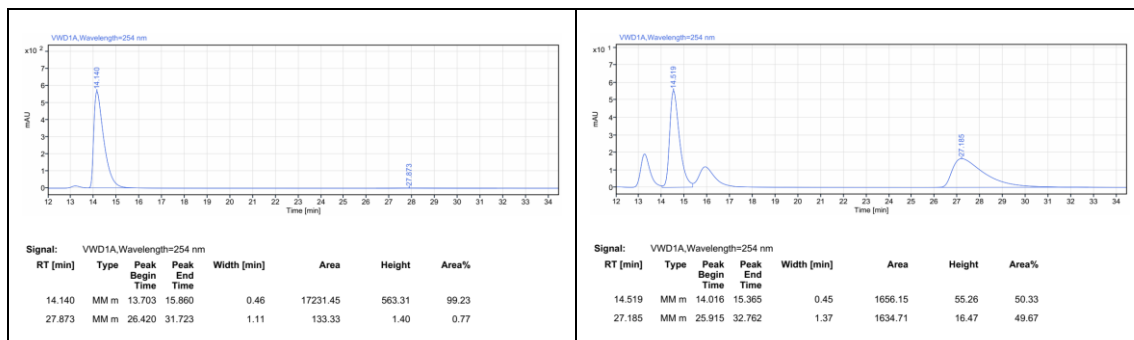

**(S)-6-((4R,5R)-4-(4-chlorobenzyl)-4-(diphenylphosphoryl)-4,5-dihydrooxazol-5-yl)-[1,1':2',1''-terphenyl]-2-carbaldehyde (3p)**

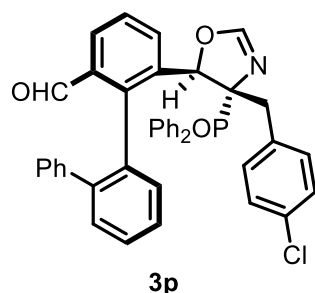

With **2c** (1.0 equiv) for 24 h. 11:1 dr (determined by crude  $^1\text{H}$  NMR). The crude reaction mixture was purified by flash column chromatography (PE/EtOAc 4:1). White solid, 50.0 mg, 77% yield. **MP**: 191-192 °C;  $^1\text{H}$  NMR (400 MHz,  $\text{CDCl}_3$ ):  $\delta$  9.78 (d,  $J$  = 0.8 Hz, 1H), 7.93-7.81 (m, 4H), 7.80-7.75 (m, 1H), 7.73 (dd,  $J$  = 7.5, 1.3 Hz, 1H), 7.56-7.53 (m, 1H), 7.46-7.40 (m, 1H), 7.33-7.24 (m, 6H), 7.18-7.12 (m, 3H), 7.06-6.95 (m, 6H), 6.76-6.72 (m, 2H), 6.69-6.65 (m, 2H), 5.75 (d,  $J$  = 19.1 Hz, 1H), 3.04 (dd,  $J$  = 14.2, 6.3 Hz, 1H), 2.89 (dd,  $J$  = 22.0, 14.2 Hz, 1H);  $^{13}\text{C}$  NMR (101 MHz,  $\text{CDCl}_3$ ):  $\delta$  192.0, 156.3 (d,  $J$  = 7.6 Hz), 144.2, 141.7, 140.1, 135.2 (d,  $J$  = 11.2 Hz), 134.9, 134.0, 133.8 (d,  $J$  = 4.7 Hz), 133.3, 132.9, 132.5, 132.4 (d,  $J$  = 8.0 Hz), 132.1, 131.9 (d,  $J$  = 8.2 Hz), 131.8 (d,  $J$  = 2.9 Hz), 131.4 (d,  $J$  = 95.1 Hz), 130.9 (d,  $J$  = 2.9 Hz), 130.0, 129.7 (d,  $J$  = 92.3 Hz), 129.4, 129.0, 128.6, 128.1 (d,  $J$  = 11.2 Hz), 127.9, 127.8, 127.7 (d,  $J$  = 9.5 Hz), 127.4, 126.9, 81.0 (d,  $J$  = 7.3 Hz), 79.5 (d,  $J$  = 81.3 Hz), 39.2 (d,  $J$  = 2.8 Hz);  $^{31}\text{P}$  NMR (162 MHz,  $\text{CDCl}_3$ ):  $\delta$  28.1; **HRMS** (ESI)  $m/z$ :  $[\text{M}+\text{H}]^+$  Calcd for  $\text{C}_{41}\text{H}_{32}\text{ClNO}_3\text{P}$  652.1803; Found 652.1799. **Optical Rotation**:  $[\alpha]_D^{20}$  =

+33.0 (c = 0.1, CH<sub>2</sub>Cl<sub>2</sub>). 99:1 er (HPLC condition: Chiralpak IA column, *n*-hexane/*i*-PrOH = 80:20, flow rate = 1 mL/min, wavelength = 254 nm, *t<sub>R</sub>* = 14.6 min for major isomer, *t<sub>R</sub>* = 26.4 min for minor isomer).

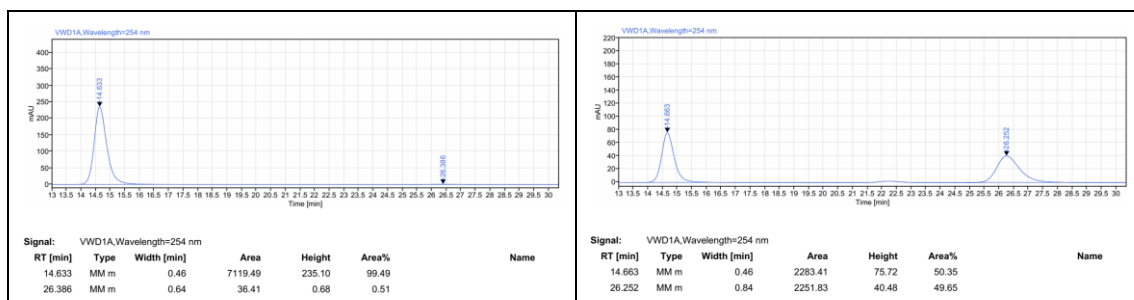

**(*S*)-6-((4*R*,5*R*)-4-(diphenylphosphoryl)-4-(naphthalen-1-ylmethyl)-4,5-dihydrooxazol-5-yl)-[1,1':2',1''-terphenyl]-2-carbaldehyde (3q)**

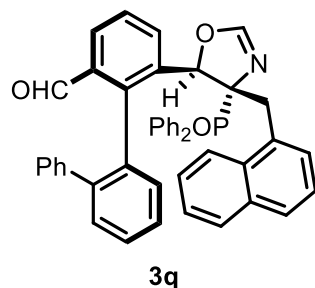

With **2d** (1.0 equiv) for 72 h. 4:1 dr (determined by crude <sup>1</sup>H NMR). The crude reaction mixture was purified by flash column chromatography (PE/EtOAc 4:1). White solid, 39.4 mg, 59% yield. **MP**: 138-139 °C; **<sup>1</sup>H NMR** (400 MHz, CDCl<sub>3</sub>): δ 9.80 (s, 1H), 8.11 (d, *J* = 8.5 Hz, 1H), 8.02-7.96 (m, 1H), 7.90 (dd, *J* = 7.7, 1.4 Hz, 1H), 7.84-7.79 (m, 1H), 7.75 (dd, *J* = 7.5, 1.5 Hz, 1H), 7.62-7.49 (m, 5H), 7.44-7.20 (m, 10H), 7.06-6.90 (m, 6H), 6.81-6.74 (m, 4H), 5.89 (d, *J* = 18.9 Hz, 1H), 3.54-3.42 (m, 2H); **<sup>13</sup>C NMR** (101 MHz, CDCl<sub>3</sub>): δ 192.0, 156.2 (d, *J* = 7.6 Hz), 144.2, 141.7, 140.2, 135.4 (d, *J* = 11.1 Hz), 134.9, 133.9, 133.5, 133.4, 133.0, 132.6 (d, *J* = 8.0 Hz), 132.2, 132.1 (d, *J* = 4.3 Hz), 131.6 (d, *J* = 2.6 Hz), 131.1 (d, *J* = 8.6 Hz), 131.0, 130.6, 130.5 (d, *J* = 2.9 Hz), 130.0, 129.7 (d, *J* = 92.1 Hz), 129.4, 129.1, 128.7, 128.1, 127.91, 127.88, 127.80, 127.75, 127.5, 127.1, 126.9 (d, *J* = 7.4 Hz), 125.5, 125.2, 125.0, 124.6, 81.1 (d, *J* = 6.6 Hz), 80.2 (d, *J* = 81.4 Hz), 36.1 (d, *J* = 2.7 Hz); **<sup>31</sup>P NMR** (162 MHz, CDCl<sub>3</sub>): δ 29.0; **HRMS** (ESI) *m/z*: [M+H]<sup>+</sup> Calcd for C<sub>45</sub>H<sub>35</sub>NO<sub>3</sub>P

668.2349; Found 668.2350. **Optical Rotation:**  $[\alpha]_D^{20} = +143.0$  ( $c = 0.1$ ,  $\text{CH}_2\text{Cl}_2$ ). 99.5:0.5 er (HPLC condition: Chiralpak IF column,  $n$ -hexane/ $i$ -PrOH = 80:20, flow rate = 1 mL/min, wavelength = 254 nm,  $t_R = 18.2$  min for major isomer,  $t_R = 43.8$  min for minor isomer).

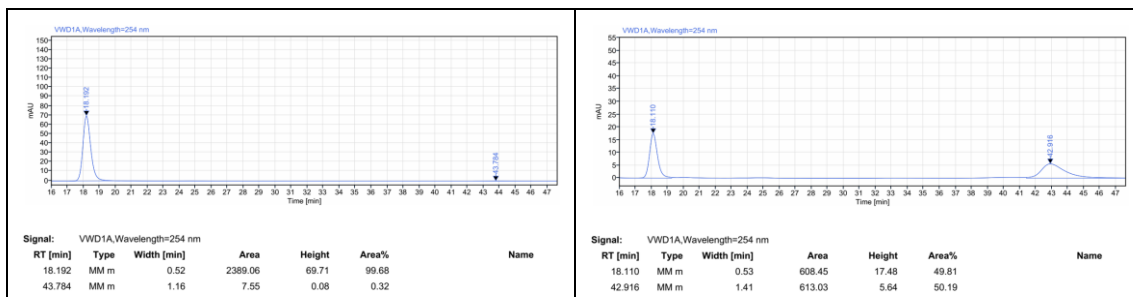

**(S)-6-((4R,5R)-4-(diphenylphosphoryl)-4-((5-(trifluoromethyl)furan-2-yl)methyl)-4,5-dihydrooxazol-5-yl)-[1,1':2',1''-terphenyl]-2-carbaldehyde (3r)**

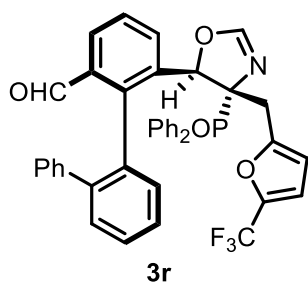

With **2e** (1.0 equiv) for 48 h. 8:1 dr (determined by crude  $^1\text{H}$  NMR). The crude reaction mixture was purified by flash column chromatography (PE/EtOAc 4:1). White wax, 31.7 mg, 47% yield.  $^1\text{H}$  NMR (400 MHz,  $\text{CDCl}_3$ ):  $\delta$  9.78 (d,  $J = 0.7$  Hz, 1H), 8.13-8.05 (m, 2H), 7.89-7.82 (m, 2H), 7.77-7.73 (m, 1H), 7.65 (dd,  $J = 7.5, 1.3$  Hz, 1H), 7.55 (dd,  $J = 7.7, 1.2$  Hz, 1H), 7.49-7.43 (m, 1H), 7.37-7.27 (m, 8H), 7.19 (dd,  $J = 7.9, 1.4$  Hz, 1H), 7.07-6.95 (m, 3H), 6.93 (d,  $J = 3.4$  Hz, 1H), 6.71-6.66 (m, 2H), 6.19-6.15 (m, 1H), 5.92 (d,  $J = 3.4$  Hz, 1H), 5.74 (d,  $J = 18.9$  Hz, 1H), 3.21 (dd,  $J = 15.5, 8.2$  Hz, 1H), 2.98 (dd,  $J = 18.2, 15.4$  Hz, 1H);  $^{13}\text{C}$  NMR (101 MHz,  $\text{CDCl}_3$ ):  $\delta$  192.0, 156.7 (d,  $J = 7.6$  Hz), 152.3 (d,  $J = 5.8$  Hz), 144.2, 141.7, 140.6 (d,  $J = 42.4$  Hz), 140.1, 134.9, 134.7 (d,  $J = 10.7$  Hz), 133.7, 133.3, 132.6 (d,  $J = 8.0$  Hz), 132.1, 132.0 (d,  $J = 2.7$  Hz), 131.9 (d,  $J = 8.5$  Hz), 131.5 (d,  $J = 2.9$  Hz), 130.8 (d,  $J = 95.6$  Hz), 130.1, 129.4, 129.1, 128.6, 128.5, 128.3, 128.2, 128.1 (d,  $J = 5.2$  Hz), 127.9, 127.7, 126.9, 119.1 (d,  $J = 266.7$  Hz), 112.0 (d,  $J = 3.1$  Hz), 111.4, 80.5 (d,  $J = 7.0$

Hz), 78.2 (d,  $J = 81.4$  Hz), 31.8 (d,  $J = 3.4$  Hz);  $^{19}\text{F}$  NMR (376 MHz,  $\text{CDCl}_3$ ):  $\delta$  -63.4;  $^{31}\text{P}$  NMR (162 MHz,  $\text{CDCl}_3$ ):  $\delta$  29.1; HRMS (ESI)  $m/z$ :  $[\text{M}+\text{Na}]^+$  Calcd for  $\text{C}_{40}\text{H}_{29}\text{F}_3\text{NNaO}_4\text{P}$  698.1679; Found 698.1678. **Optical Rotation**:  $[\alpha]_D^{20} = +67.4$  ( $c = 0.1$ ,  $\text{CH}_2\text{Cl}_2$ ). 99:1 er (HPLC condition: Chiralpak IF column,  $n$ -hexane/ $i$ -PrOH = 80:20, flow rate = 1 mL/min, wavelength = 254 nm,  $t_R = 12.0$  min for major isomer,  $t_R = 14.9$  min for minor isomer).

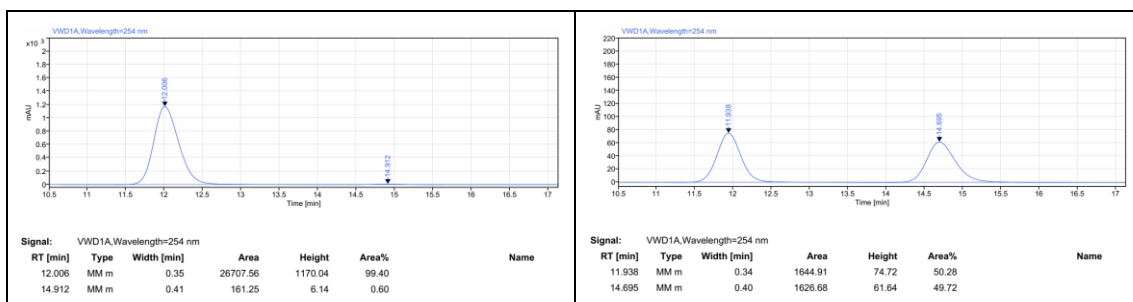

**(S)-6-((4R,5R)-4-(diphenylphosphoryl)-4-methyl-4,5-dihydrooxazol-5-yl)-[1,1':2',1''-terphenyl]-2-carbaldehyde (3s)**

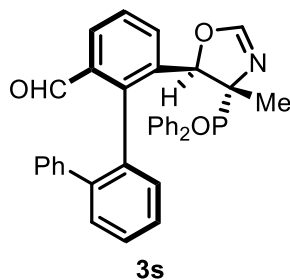

With **2f** (1.0 equiv) for 24 h. 13:1 dr (determined by crude  $^1\text{H}$  NMR). The crude reaction mixture was purified by flash column chromatography (PE/EtOAc 4:1). White solid, 38.4 mg, 71% yield. **MP**: 106-107 °C;  $^1\text{H}$  NMR (400 MHz,  $\text{CDCl}_3$ ):  $\delta$  9.71 (d,  $J = 0.8$  Hz, 1H), 8.25-8.18 (m, 2H), 7.80 (dd,  $J = 7.7, 1.4$  Hz, 1H), 7.76-7.71 (m, 1H), 7.67-7.64 (m, 1H), 7.53 (dd,  $J = 7.4, 1.4$  Hz, 1H), 7.49-7.25 (m, 10H), 7.21-7.18 (m, 1H), 7.02-6.92 (m, 3H), 6.73-6.68 (m, 3H), 5.65 (d,  $J = 19.0$  Hz, 1H), 1.26 (d,  $J = 14.3$  Hz, 3H);  $^{13}\text{C}$  NMR (101 MHz,  $\text{CDCl}_3$ ):  $\delta$  192.1, 156.0 (d,  $J = 7.9$  Hz), 144.2, 141.6, 140.2, 135.3 (d,  $J = 10.8$  Hz), 134.9, 133.6 (d,  $J = 6.5$  Hz), 132.7 (d,  $J = 4.1$  Hz), 132.6 (d,  $J = 3.7$  Hz), 132.2 (d,  $J = 2.8$  Hz), 132.1, 132.0, 130.1 (d,  $J = 95.3$  Hz), 129.9, 129.3, 129.2, 128.61 (d,  $J = 93.2$  Hz), 128.59, 128.5, 128.4, 128.1, 127.93, 127.88, 127.7, 126.9, 79.8 (d,  $J = 7.1$  Hz), 75.3 (d,  $J = 81.4$  Hz), 19.3 (d,  $J =$

2.8 Hz);  $^{31}\text{P}$  NMR (162 MHz,  $\text{CDCl}_3$ ):  $\delta$  32.0; **HRMS** (ESI)  $m/z$ :  $[\text{M}+\text{Na}]^+$  Calcd for  $\text{C}_{35}\text{H}_{28}\text{NNaO}_3\text{P}$  564.1699; Found 564.1701. **Optical Rotation**:  $[\alpha]_D^{20} = +465.1$  ( $c = 0.3$ ,  $\text{CH}_2\text{Cl}_2$ ). 99:1 er (HPLC condition: Chiralpak IB N-5 column, *n*-hexane/*i*-PrOH = 90:10, flow rate = 1 mL/min, wavelength = 254 nm,  $t_R = 13.9$  min for major isomer,  $t_R = 15.2$  min for minor isomer).

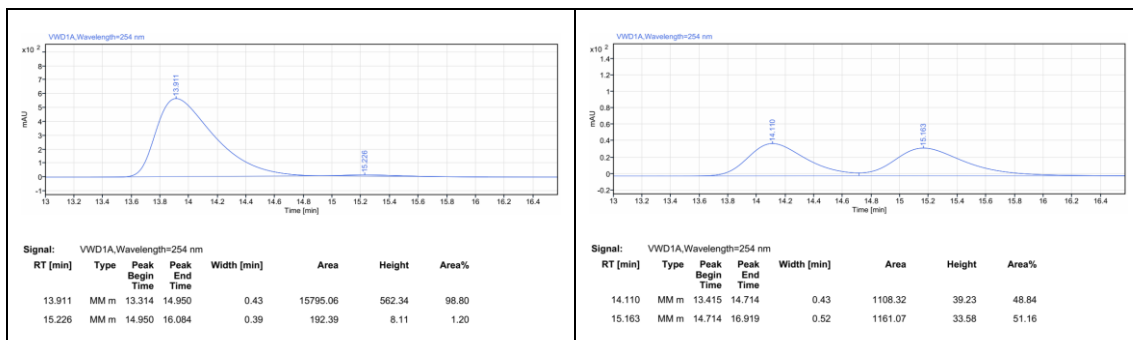

## Methyl

### (4*S*,5*R*)-4-benzyl-5-((*S*)-6-formyl-[1,1':2',1''-terphenyl]-2-yl)-4,5-dihydrooxazole-4-carboxylate (**3t**)

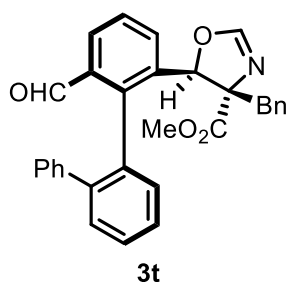

With **2g** (1.0 equiv) for 24 h. 4:1 dr (determined by crude  $^1\text{H}$  NMR). The crude reaction mixture was purified by flash column chromatography (PE/EtOAc 4:1). White solid, 34.2 mg, 72% yield. **MP**: 100-101 °C;  $^1\text{H}$  NMR (400 MHz,  $\text{CDCl}_3$ ):  $\delta$  9.77 (d,  $J = 0.8$  Hz, 1H), 7.84 (dd,  $J = 7.7, 1.4$  Hz, 1H), 7.74-7.65 (m, 3H), 7.62-7.59 (m, 1H), 7.37-7.31 (m, 1H), 7.26-7.23 (m, 1H), 7.22-7.16 (m, 3H), 7.11-7.04 (m, 3H), 6.90-6.84 (m, 3H), 6.68-6.63 (m, 2H), 5.22 (s, 1H), 3.30 (s, 3H), 3.10 (d,  $J = 13.7$  Hz, 1H), 2.87 (d,  $J = 13.7$  Hz, 1H);  $^{13}\text{C}$  NMR (101 MHz,  $\text{CDCl}_3$ ):  $\delta$  191.9, 171.3, 155.6, 143.4, 142.2, 139.8, 136.6, 134.4, 134.3, 133.4, 132.7, 131.5, 131.2, 130.5, 129.5, 129.1, 128.2, 128.1, 127.9, 127.81, 127.76, 127.3, 83.0, 81.0, 52.4, 43.0; **HRMS** (ESI)  $m/z$ :  $[\text{M}+\text{H}]^+$  Calcd for  $\text{C}_{31}\text{H}_{26}\text{NO}_4$  476.1856; Found 476.1857. **Optical Rotation**:

$[\alpha]_D^{20} = +13.6$  ( $c = 0.3$ ,  $\text{CH}_2\text{Cl}_2$ ). 97.5:2.5 er (HPLC condition: Chiralpak IB N-5 column,  $n$ -hexane/ $i$ -PrOH = 90:10, flow rate = 1 mL/min, wavelength = 254 nm,  $t_R = 17.5$  min for major isomer,  $t_R = 22.5$  min for minor isomer).

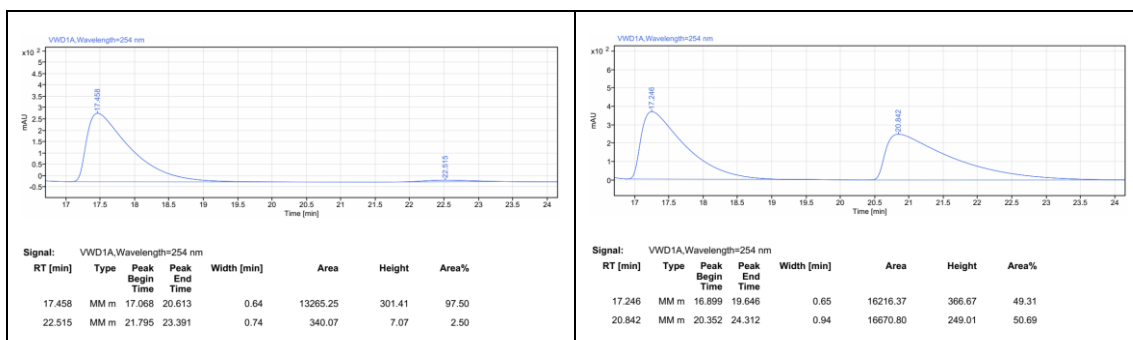

## VI. Evaluation of the thermal stability of the chiral axis

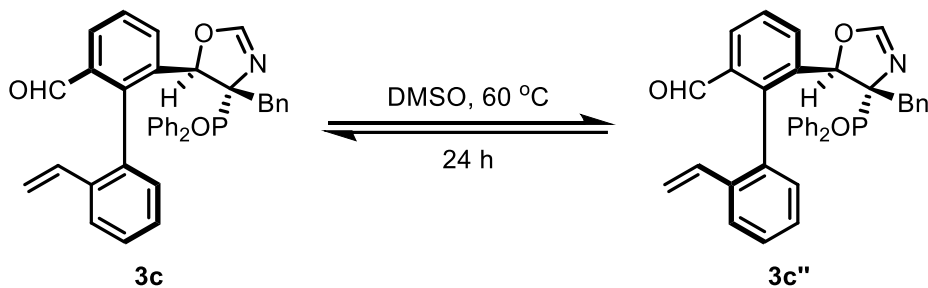

To a 10 mL vial charged with **3c** (0.010 mmol) was added anhydrous DMSO (1.0 mL). After stirring at 60 °C for 24 h, no **3c''** was detected by  $^1\text{H}$  NMR spectroscopy, and the ee value of **3c** remained unchanged.

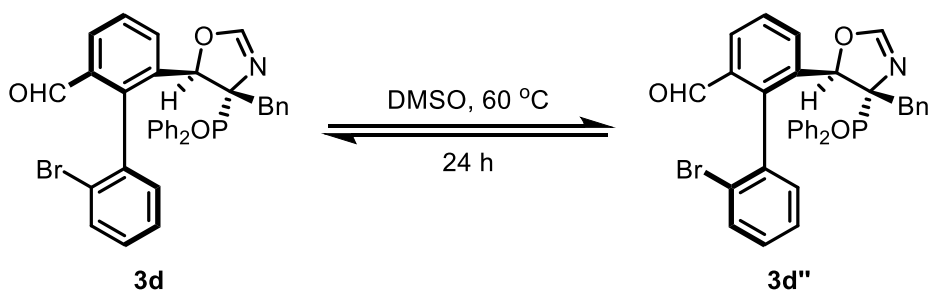

To a 10 mL vial charged with **3d** (0.010 mmol) was added anhydrous DMSO (1.0 mL). After stirring at 60 °C for 24 h, no **3d''** was detected by  $^1\text{H}$  NMR spectroscopy, and the ee value of **3d** remained unchanged.



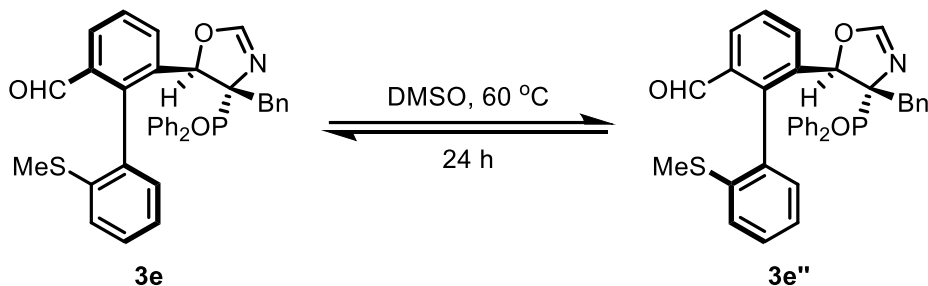

To a 10 mL vial charged with **3e** (0.010 mmol) was added anhydrous DMSO (1.0 mL). After stirring at 60 °C for 24 h, no **3e''** was detected by  $^1\text{H}$  NMR spectroscopy, and the ee value of **3e** remained unchanged.

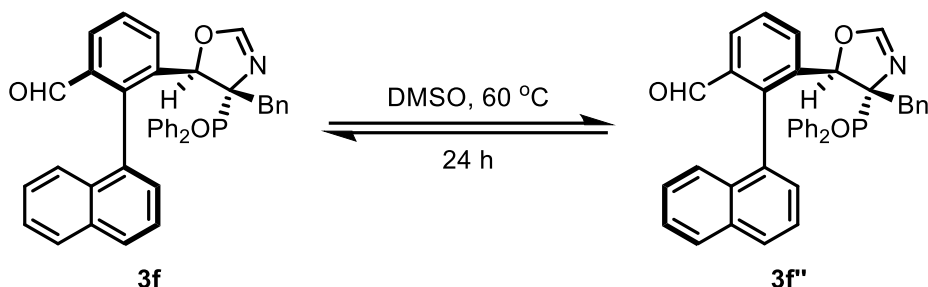

To a 10 mL vial charged with **3f** (0.010 mmol) was added anhydrous DMSO (1.0 mL). After stirring at 60 °C for 24 h, no **3f''** was detected by  $^1\text{H}$  NMR spectroscopy, and the ee value of **3f** remained unchanged.

## VII. Gram-scale reaction and derivatization

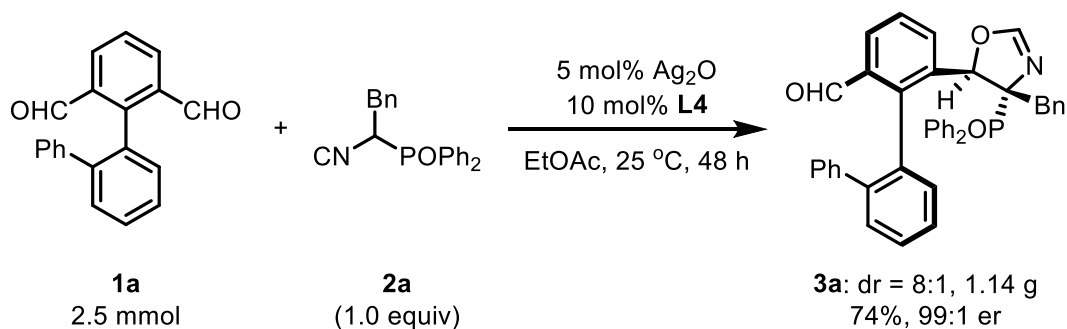

To a 50 mL round-bottom flask charged with **L4** (145.3 mg, 0.25 mmol) and  $\text{Ag}_2\text{O}$  (29.0 mg, 0.125 mmol) was added anhydrous EtOAc (25.0 mL). The mixture was stirred at ambient temperature for 5 min, then **1a** (715.0 mg, 2.5 mmol) and **2a** (827.5 mg, 2.5 mmol) were added successively in one portion. The reaction mixture was

stirred at 25 °C for 48 h, then concentrated and purified by flash column chromatography (PE/EtOAc 4:1) to afford **3a**.

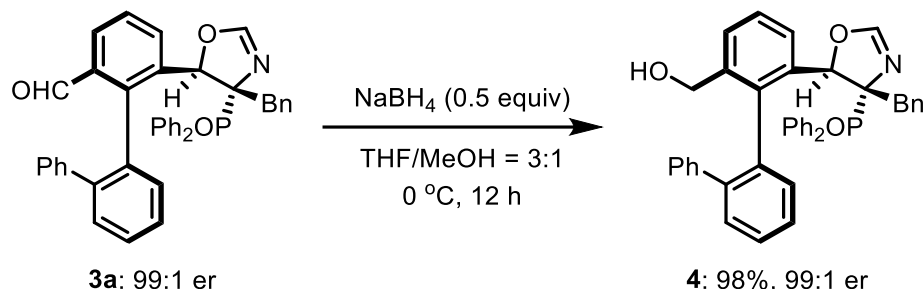

To a suspension of NaBH<sub>4</sub> (1.9 mg, 0.05 mmol) in THF/MeOH = 3:1 (1.0 mL) under nitrogen atmosphere was added a solution of **3a** (61.7 mg, 0.10 mmol) in THF/MeOH = 3:1 (1.0 mL). The reaction mixture was stirred at 0 °C for 12 h and then concentrated and purified by flash column chromatography (EtOAc) to afford **4**.

**((4*R*,5*R*)-4-benzyl-5-((*R*)-6-(hydroxymethyl)-[1,1':2',1''-terphenyl]-2-yl)-4,5-dihydrooxazol-4-yl)diphenylphosphine oxide (**4**)**

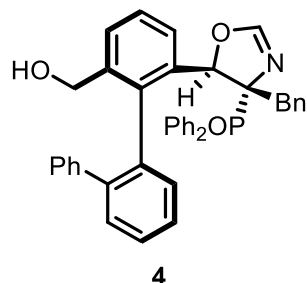

White solid, 60.6 mg, 98% yield. **MP**: 245-246 °C; **<sup>1</sup>H NMR** (400 MHz, CDCl<sub>3</sub>): δ 7.89-7.81 (m, 3H), 7.72-7.66 (m, 1H), 7.61-7.57 (m, 1H), 7.53 (dd, *J* = 7.7, 1.3 Hz, 1H), 7.44 (d, *J* = 7.4 Hz, 1H), 7.40-7.34 (m, 1H), 7.25-7.16 (m, 6H), 7.11-7.02 (m, 5H), 7.01-6.95 (m, 2H), 6.94-6.90 (m, 2H), 6.83-6.76 (m, 5H), 5.68 (d, *J* = 19.4 Hz, 1H), 4.46 (d, *J* = 13.6 Hz, 1H), 4.28 (d, *J* = 13.6 Hz, 1H), 3.13-2.96 (m, 2H); **<sup>13</sup>C NMR** (101 MHz, CDCl<sub>3</sub>): δ 156.4 (d, *J* = 7.7 Hz), 140.6 (d, *J* = 4.8 Hz), 139.9, 139.1, 135.7 (d, *J* = 4.2 Hz), 134.7, 134.0 (d, *J* = 10.8 Hz), 132.7, 132.4 (d, *J* = 7.9 Hz), 132.0 (d, *J* = 8.4 Hz), 131.8 (d, *J* = 94.8 Hz), 131.6, 131.5 (d, *J* = 2.7 Hz), 130.8 (d, *J* = 2.9 Hz), 130.1, 130.0 (d, *J* = 92.2 Hz), 129.0, 128.8, 128.7, 128.0, 127.9, 127.67,

127.65, 127.6, 127.54, 127.48, 127.2, 126.7, 126.4, 82.0 (d,  $J = 7.1$  Hz), 79.4 (d,  $J = 81.4$  Hz), 63.3, 39.4 (d,  $J = 2.7$  Hz);  $^{31}\text{P}$  NMR (162 MHz,  $\text{CDCl}_3$ ):  $\delta$  28.6; HRMS (ESI)  $m/z$ :  $[\text{M}+\text{Na}]^+$  Calcd for  $\text{C}_{41}\text{H}_{34}\text{NNaO}_3\text{P}$  642.2169; Found 642.2167. **Optical Rotation**:  $[\alpha]_D^{20} = +76.7$  ( $c = 0.1$ ,  $\text{CH}_2\text{Cl}_2$ ). 99:1 er (HPLC condition: Chiralpak IB N-5 column,  $n$ -hexane/ $i$ -PrOH = 80:20, flow rate = 1 mL/min, wavelength = 254 nm,  $t_R = 5.4$  min for major isomer,  $t_R = 9.0$  min for minor isomer).

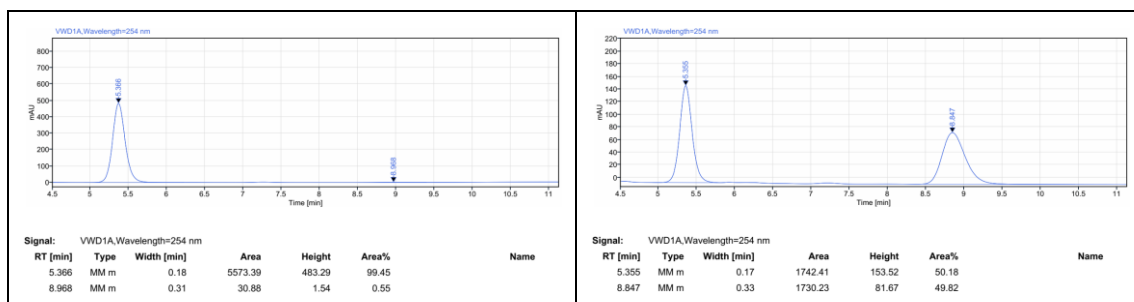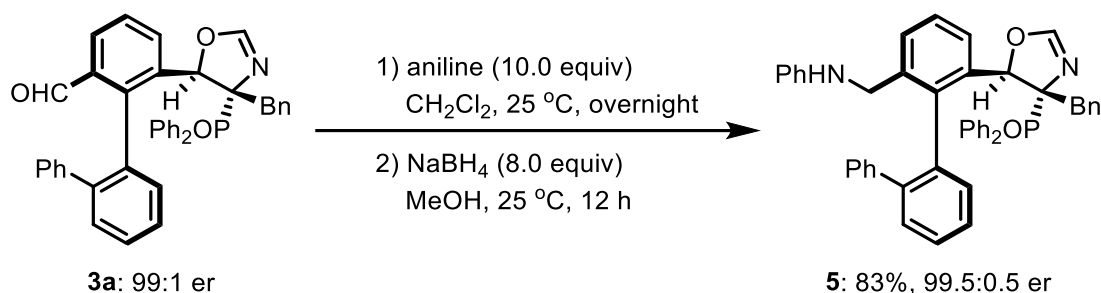

To a solution of **3a** (30.9 mg, 0.05 mmol) in anhydrous  $\text{CH}_2\text{Cl}_2$  (1.0 mL) was added aniline (46.6 mg, 0.5 mmol). The reaction mixture was stirred at 25 °C overnight, after which  $\text{NaBH}_4$  (15.1 mg, 0.4 mmol) and MeOH (1.0 mL) were added and the mixture was stirred for an additional 12 h. After completion of the reaction, the solvent was removed under reduced pressure. To the residue, water was added and the mixture was extracted with  $\text{CH}_2\text{Cl}_2$ . The combined organic layers were washed with brine, dried over anhydrous  $\text{Na}_2\text{SO}_4$  and the solvent was removed under reduced pressure. The residue was purified by flash column chromatography (PE/EtOAc 4:1) to afford **5**.

**((4*R*,5*R*)-4-benzyl-5-((*R*)-6-((phenylamino)methyl)-[1,1':2',1''-terphenyl]-2-yl)-4,5-dihydrooxazol-4-yl)diphenylphosphine oxide (**5**)**

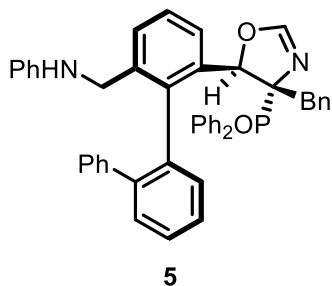

White solid, 29.0 mg, 83% yield. **MP**: 127-128 °C; **<sup>1</sup>H NMR** (400 MHz, DMSO-*d*<sub>6</sub>): δ 7.83-7.70 (m, 4H), 7.60-7.54 (m, 2H), 7.47 (d, *J* = 3.5 Hz, 1H), 7.44-7.39 (m, 1H), 7.30-7.24 (m, 3H), 7.18-7.11 (m, 7H), 7.08-7.03 (m, 4H), 6.94-6.85 (m, 5H), 6.82-6.76 (m, 3H), 6.48-6.42 (m, 1H), 6.17-6.12 (m, 2H), 5.62 (d, *J* = 19.4 Hz, 1H), 3.83 (d, *J* = 16.5 Hz, 1H), 3.58 (d, *J* = 16.5 Hz, 1H), 3.05-2.90 (m, 2H); **<sup>13</sup>C NMR** (101 MHz, DMSO-*d*<sub>6</sub>): δ 157.2 (d, *J* = 7.6 Hz), 148.4, 140.4, 139.7, 139.1, 137.6, 135.4 (d, *J* = 4.2 Hz), 134.3, 134.2, 132.4, 132.2 (d, *J* = 93.6 Hz), 131.9 (d, *J* = 7.8 Hz), 131.6, 131.5, 131.3, 130.7, 129.82, 129.75, 128.81, 128.78, 128.7, 128.4, 127.8 (d, *J* = 10.6 Hz), 127.7, 127.5 (d, *J* = 11.2 Hz), 127.0, 126.8, 126.7 (d, *J* = 4.1 Hz), 126.5, 126.1, 115.8, 112.0, 81.1 (d, *J* = 7.2 Hz), 78.8 (d, *J* = 81.0 Hz), 45.2; **<sup>31</sup>P NMR** (162 MHz, CDCl<sub>3</sub>): δ 28.9; **HRMS** (ESI) *m/z*: [M+Na]<sup>+</sup> Calcd for C<sub>47</sub>H<sub>39</sub>N<sub>2</sub>NaO<sub>2</sub>P 717.2641; Found 717.2640. **Optical Rotation**: [α]<sup>14</sup><sub>D</sub> = +104.1 (*c* = 0.7, CH<sub>2</sub>Cl<sub>2</sub>). 99.5:0.5 er (HPLC condition: Chiralpak IB N-5 column, *n*-hexane/*i*-PrOH = 90:10, flow rate = 1 mL/min, wavelength = 254 nm, *t*<sub>R</sub> = 15.0 min for major isomer, *t*<sub>R</sub> = 23.9 min for minor isomer).

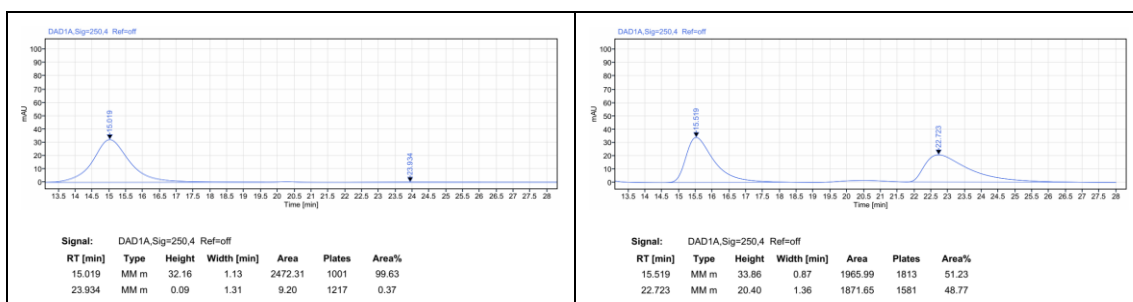

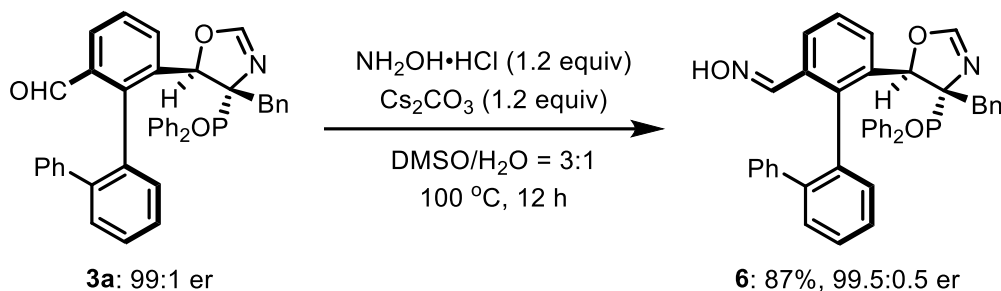

To a mixture of **3a** (61.7 mg, 0.10 mmol) and  $\text{Cs}_2\text{CO}_3$  (39.1 mg, 0.12 mmol) in  $\text{DMSO}/\text{H}_2\text{O} = 3:1$  (1.0 mL) was added a solution of  $\text{NH}_2\text{OH}\cdot\text{HCl}$  (8.3 mg, 0.12 mmol) in  $\text{DMSO}/\text{H}_2\text{O} = 3:1$  (1.0 mL). The reaction mixture was stirred at  $100\text{ }^\circ\text{C}$  for 12 h. After completion, the reaction mixture was cooled to room temperature and treated with water ( $2 \times 5\text{ mL}$ ). The resulting mixture was extracted with ethyl acetate (5 mL). The organic layer was dried over anhydrous  $\text{Na}_2\text{SO}_4$  and the solvent was removed under reduced pressure. The residue was purified by flash column chromatography (PE/EtOAc 4:1) to afford **6**.

**(E)-6-((4R,5R)-4-benzyl-4-(diphenylphosphoryl)-4,5-dihydrooxazol-5-yl)-[1,1':2',1''-terphenyl]-2-carbaldehyde oxime (**6**)**

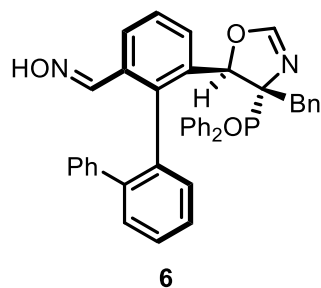

White solid, 55.0 mg, 87% yield. **MP**:  $157\text{-}158\text{ }^\circ\text{C}$ ;  $^1\text{H NMR}$  (400 MHz,  $\text{CDCl}_3$ ):  $\delta$  10.33 (d,  $J = 1.9\text{ Hz}$ , 1H), 8.02 (s, 1H), 7.91-7.80 (m, 3H), 7.74-7.69 (m, 1H), 7.66 (dd,  $J = 7.5, 1.4\text{ Hz}$ , 1H), 7.56-7.49 (m, 2H), 7.48-7.43 (m, 1H), 7.36-7.30 (m, 2H), 7.28-7.17 (m, 3H), 7.13-7.06 (m, 4H), 7.04-6.99 (m, 1H), 6.96-6.89 (m, 4H), 6.83-6.76 (m, 4H), 6.70-6.66 (m, 2H), 5.62 (d,  $J = 19.8\text{ Hz}$ , 1H), 3.24 (dd,  $J = 14.4, 7.0\text{ Hz}$ , 1H), 2.95 (dd,  $J = 23.1, 14.4\text{ Hz}$ , 1H);  $^{13}\text{C NMR}$  (101 MHz,  $\text{CDCl}_3$ ):  $\delta$  156.4 (d,  $J = 8.2\text{ Hz}$ ), 148.9, 140.8, 140.5, 140.4, 135.8 (d,  $J = 4.5\text{ Hz}$ ), 134.2, 133.8, 133.7 (d,  $J = 10.8\text{ Hz}$ ), 132.7, 132.5 (d,  $J = 8.1\text{ Hz}$ ), 131.9 (d,  $J = 8.0\text{ Hz}$ ), 131.7, 131.6,

130.9 (d,  $J = 3.8$  Hz), 129.9, 129.6 (d,  $J = 93.3$  Hz), 129.4, 129.1, 129.0, 128.8, 128.2, 128.0, 127.8, 127.7, 127.6, 127.2, 127.0, 126.5, 126.3, 81.7 (d,  $J = 7.5$  Hz), 79.4 (d,  $J = 82.5$  Hz), 38.8 (d,  $J = 2.8$  Hz);  $^{31}\text{P}$  NMR (162 MHz,  $\text{CDCl}_3$ ):  $\delta$  29.0; HRMS (ESI)  $m/z$ :  $[\text{M}+\text{Na}]^+$  Calcd for  $\text{C}_{41}\text{H}_{33}\text{N}_2\text{NaO}_3\text{P}$  655.2121; Found 655.2121. **Optical Rotation**:  $[\alpha]_{\text{D}}^{20} = +185.4$  ( $c = 0.1$ ,  $\text{CH}_2\text{Cl}_2$ ). 99.5:0.5 er (HPLC condition: Chiralpak IB N-5 column,  $n$ -hexane/ $i$ -PrOH = 90:10, flow rate = 1 mL/min, wavelength = 254 nm,  $t_{\text{R}} = 9.2$  min for major isomer,  $t_{\text{R}} = 10.5$  min for minor isomer).

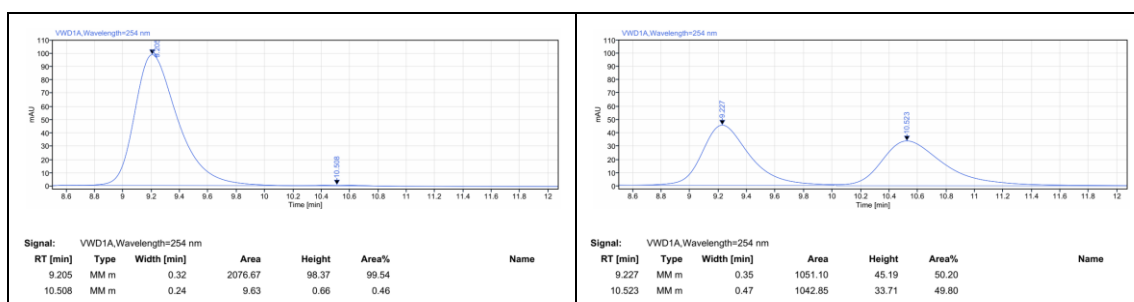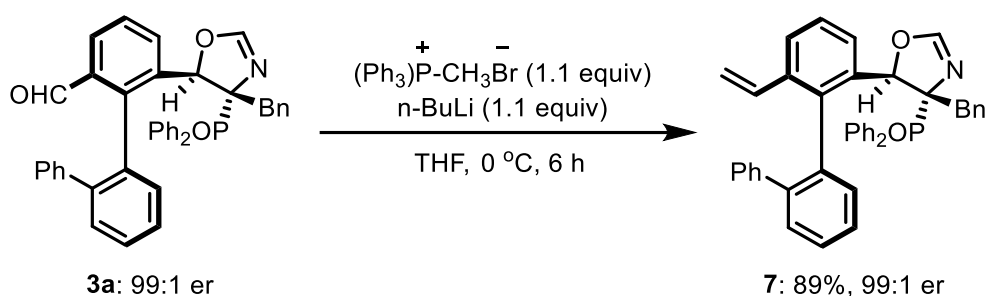

To a stirred solution of methyltriphenylphosphonium bromide (39.3 mg, 0.11 mmol) in anhydrous THF (0.5 mL) was added  $n$ -BuLi (2.5 M in hexane, 45  $\mu\text{L}$ , 0.11 mmol) dropwise at  $0\text{ }^\circ\text{C}$  under nitrogen atmosphere and stirred for 0.5 h. Then a solution of **3a** (61.7 mg, 0.1 mmol) in THF (0.5 mL) was added and stirred at  $0\text{ }^\circ\text{C}$  for 6 h. After completion, the reaction mixture was quenched with water (3 mL), and extracted with ethyl acetate ( $2 \times 5$  mL). The organic layer was dried over anhydrous  $\text{Na}_2\text{SO}_4$  and the solvent was removed under reduced pressure. The residue was purified by flash column chromatography (PE/EtOAc 4:1) to afford **7**.

**((4*R*,5*R*)-4-benzyl-5-((*R*)-6-vinyl-[1,1':2',1''-terphenyl]-2-yl)-4,5-dihydrooxazol-4-yl)diphenylphosphine oxide (**7**)**

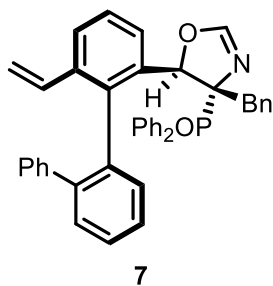

White solid, 54.8 mg, 89% yield. **MP**: 222-223 °C; **<sup>1</sup>H NMR** (400 MHz, CDCl<sub>3</sub>): δ 7.83-7.76 (m, 3H), 7.67-7.62 (m, 1H), 7.51 (dd, *J* = 7.6, 1.3 Hz, 1H), 7.47-7.41 (m, 2H), 7.39-7.34 (m, 1H), 7.27-7.17 (m, 4H), 7.15-7.10 (m, 1H), 7.05-6.94 (m, 6H), 6.92-6.87 (m, 2H), 6.82 (d, *J* = 3.6 Hz, 1H), 6.76-6.65 (m, 6H), 6.46 (dd, *J* = 17.5, 11.0 Hz, 1H), 5.57-5.54 (m, 1H), 5.53-5.50 (m, 1H), 5.08 (dd, *J* = 11.1, 1.2 Hz, 1H), 3.00 (dd, *J* = 14.3, 7.5 Hz, 1H), 2.86 (dd, *J* = 21.9, 14.3 Hz, 1H); **<sup>13</sup>C NMR** (101 MHz, CDCl<sub>3</sub>): δ 156.4 (d, *J* = 7.7 Hz), 141.0, 140.8, 139.5, 137.6, 135.8 (d, *J* = 4.5 Hz), 135.7, 135.3, 134.0 (d, *J* = 11.1 Hz), 133.1, 132.5 (d, *J* = 8.0 Hz), 132.4, 132.0 (d, *J* = 8.3 Hz), 131.6, 131.5 (d, *J* = 3.1 Hz), 130.7 (d, *J* = 3.3 Hz), 129.9, 129.8, 129.0, 128.6, 128.4, 127.9 (d, *J* = 11.1 Hz), 127.7 (d, *J* = 11.5 Hz), 127.5, 127.4, 127.19, 127.15, 126.5, 126.3, 125.2, 115.4, 82.0 (d, *J* = 7.1 Hz), 79.5 (d, *J* = 81.3 Hz), 39.2 (d, *J* = 2.7 Hz); **<sup>31</sup>P NMR** (162 MHz, CDCl<sub>3</sub>): δ 28.1; **HRMS** (ESI) *m/z*: [M+H]<sup>+</sup> Calcd for C<sub>42</sub>H<sub>35</sub>NO<sub>2</sub>P 616.2400; Found 616.2396. **Optical Rotation**: [α]<sup>20</sup><sub>D</sub> = +216.1 (c = 0.1, CH<sub>2</sub>Cl<sub>2</sub>). 99:1 er (HPLC condition: Chiralpak IB N-5 column, *n*-hexane/*i*-PrOH = 95:5, flow rate = 1 mL/min, wavelength = 254 nm, *t*<sub>R</sub> = 7.7 min for major isomer, *t*<sub>R</sub> = 8.6 min for minor isomer).

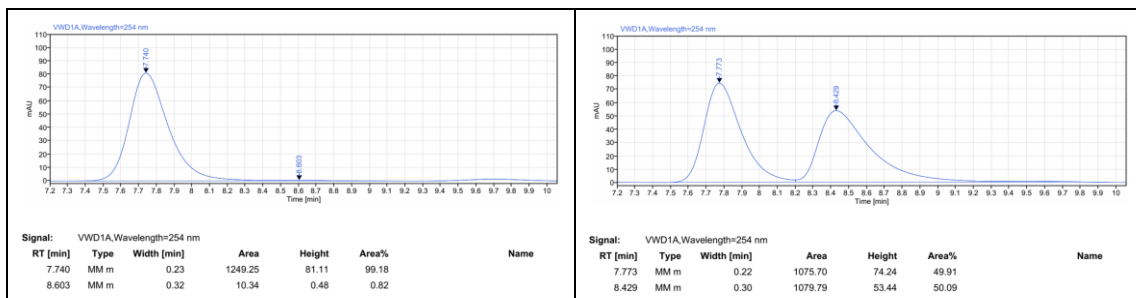

### VIII. Isolation of *rac-3e'* and *rac-3e''*

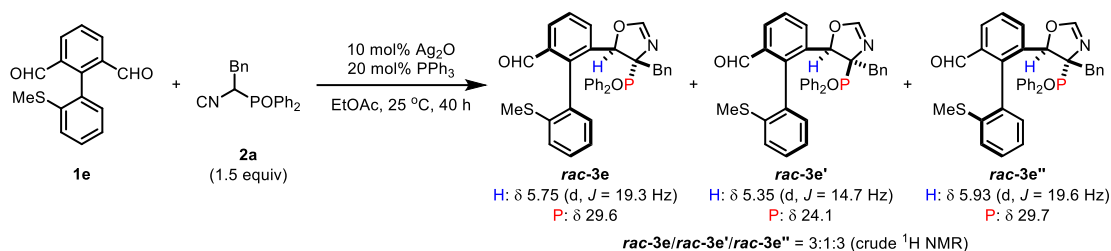

To a 10 mL vial charged with PPh<sub>3</sub> (5.24 mg, 0.02 mmol) and Ag<sub>2</sub>O (2.32 mg, 0.01 mmol) was added anhydrous EtOAc (1.0 mL). The mixture was stirred at ambient temperature for 5 min, then **1e** (25.6 mg, 0.10 mmol) and **2a** (49.7 mg, 0.15 mmol) were added successively in one portion. The reaction mixture was stirred at 25 °C for 40 h, then concentrated and purified by flash column chromatography (PE/EtOAc 5:1) to afford *rac-3e'* and *rac-3e''*.

(±)-(*S*)-6-((4*S*,5*R*)-4-benzyl-4-(diphenylphosphoryl)-4,5-dihydrooxazol-5-yl)-2'-(methylthio)-[1,1'-biphenyl]-2-carbaldehyde (*rac-3e'*)

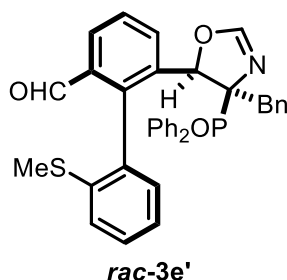

White solid. **MP**: 131-132 °C; <sup>1</sup>H NMR (400 MHz, CDCl<sub>3</sub>): δ 9.51 (d, *J* = 0.8 Hz, 1H), 8.43 (dd, *J* = 7.6, 1.6 Hz, 1H), 8.32-8.23 (m, 2H), 7.83 (dd, *J* = 7.7, 1.4 Hz, 1H), 7.75-7.68 (m, 2H), 7.63-7.57 (m, 1H), 7.54-7.43 (m, 5H), 7.36 (dd, *J* = 8.0, 1.2 Hz, 1H), 7.34-7.28 (m, 2H), 7.15-7.03 (m, 3H), 7.00 (d, *J* = 2.0 Hz, 1H), 6.70 (t, *J* = 7.8 Hz, 1H), 6.43 (dd, *J* = 7.8, 1.4 Hz, 1H), 6.29-6.24 (m, 2H), 5.35 (d, *J* = 14.7 Hz, 1H), 2.93 (dd, *J* = 13.6, 6.1 Hz, 1H), 2.83 (dd, *J* = 13.6, 4.6 Hz, 1H), 2.26 (s, 3H); <sup>13</sup>C NMR (101 MHz, CDCl<sub>3</sub>): δ 192.2, 155.8 (d, *J* = 13.1 Hz), 143.0, 139.2, 135.2 (d, *J* = 6.3 Hz), 134.1, 133.8 (d, *J* = 12.6 Hz), 133.7, 133.5, 133.2, 133.0 (d, *J* = 16.5 Hz), 132.5 (d, *J* = 7.9 Hz), 132.0 (d, *J* = 8.0 Hz), 131.6 (d, *J* = 2.8 Hz), 131.5, 131.4, 129.7, 128.6, 128.5, 128.2, 128.1, 127.8, 127.2, 127.1 (d, *J* = 2.9 Hz), 124.8, 123.6, 81.3 (d, *J* = 4.2 Hz), 78.5 (d, *J* = 86.5 Hz), 40.4 (d, *J* = 5.7 Hz), 15.2; <sup>31</sup>P NMR (162 MHz,



CDCl<sub>3</sub>):  $\delta$  24.1; **HRMS** (ESI)  $m/z$ : [M+Na]<sup>+</sup> Calcd for C<sub>36</sub>H<sub>30</sub>NNaO<sub>3</sub>PS 610.1576; Found 610.1580.

( $\pm$ )-(*R*)-6-((4*R*,5*R*)-4-benzyl-4-(diphenylphosphoryl)-4,5-dihydrooxazol-5-yl)-2'-(methylthio)-[1,1'-biphenyl]-2-carbaldehyde (*rac*-3e'')

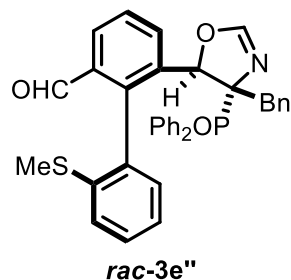

White solid. **MP**: 110-111 °C; **<sup>1</sup>H NMR** (400 MHz, CDCl<sub>3</sub>):  $\delta$  9.54 (s, 1H), 8.03-7.95 (m, 3H), 7.60-7.54 (m, 1H), 7.51-7.36 (m, 6H), 7.33-7.17 (m, 6H), 6.95-6.83 (m, 5H), 6.70-6.54 (m, 2H), 5.93 (d,  $J$  = 19.6 Hz, 1H), 3.44 (dd,  $J$  = 14.6, 8.0 Hz, 1H), 3.07 (dd,  $J$  = 17.0, 14.6 Hz, 1H), 2.59 (s, 3H); **<sup>13</sup>C NMR** (101 MHz, CDCl<sub>3</sub>):  $\delta$  192.3, 155.7 (d,  $J$  = 7.8 Hz), 142.6, 140.8, 135.9 (d,  $J$  = 6.9 Hz), 135.3 (d,  $J$  = 11.2 Hz), 134.9, 134.8, 133.1, 132.7 (d,  $J$  = 7.8 Hz), 132.1 (d,  $J$  = 8.3 Hz), 131.8, 131.5, 131.24 (d,  $J$  = 2.8 Hz), 131.16 (d,  $J$  = 96.0 Hz), 129.6, 129.32 (d,  $J$  = 92.0 Hz), 129.30, 128.1, 128.0 (d,  $J$  = 5.4 Hz), 127.9 (d,  $J$  = 4.8 Hz), 127.5, 127.3, 126.5, 125.4, 124.0, 81.2, 79.6 (d,  $J$  = 80.6 Hz), 37.1 (d,  $J$  = 3.4 Hz), 15.7; **<sup>31</sup>P NMR** (162 MHz, CDCl<sub>3</sub>):  $\delta$  29.7; **HRMS** (ESI)  $m/z$ : [M+Na]<sup>+</sup> Calcd for C<sub>36</sub>H<sub>30</sub>NNaO<sub>3</sub>PS 610.1576; Found 610.1574.

## IX. Crystal structure data of 3a and 3a'

The relative and absolute configurations of **3a** (*S*,4*R*,5*R*) were assigned by X-ray crystallographic analysis of a single crystal of **3a** (Figure S2). The crystal was prepared from the solution of **3a** in PE/EtOAc/CH<sub>2</sub>Cl<sub>2</sub> = 4:1:1 at 25 °C.

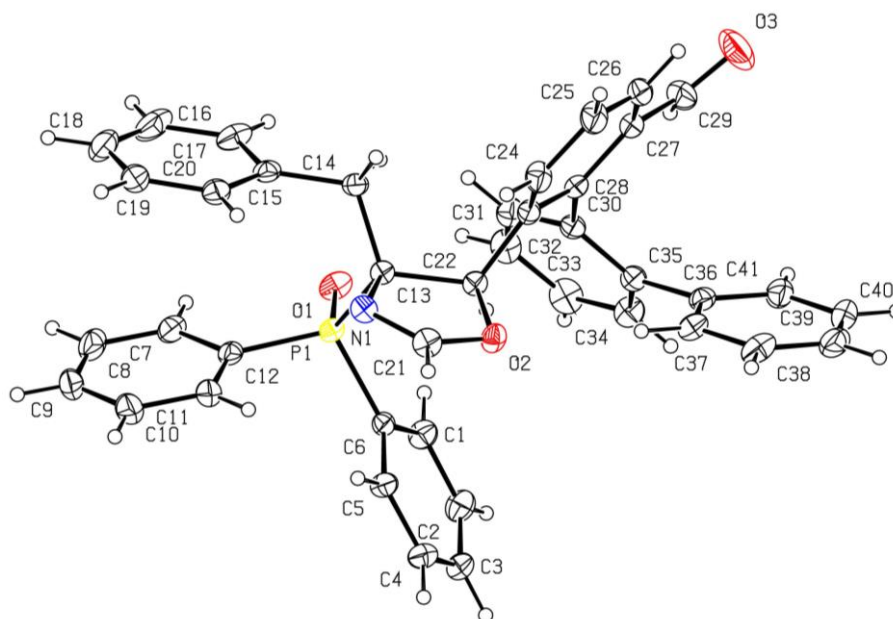

Figure S2. X-ray structure of **3a** (ellipsoid contour at 30% probability)

Table S1. Crystal data and structure refinement for mo\_220412\_HF\_0m\_tw

|                                    |                                                   |
|------------------------------------|---------------------------------------------------|
| Identification code                | mo_220412_HF_0m_tw                                |
| Empirical formula                  | C <sub>41</sub> H <sub>32</sub> NO <sub>3</sub> P |
| Formula weight                     | 617.64                                            |
| Temperature/K                      | 170.0                                             |
| Crystal system                     | monoclinic                                        |
| Space group                        | P2 <sub>1</sub>                                   |
| a/Å                                | 14.582(4)                                         |
| b/Å                                | 14.754(3)                                         |
| c/Å                                | 15.384(4)                                         |
| α/°                                | 90                                                |
| β/°                                | 95.337(13)                                        |
| γ/°                                | 90                                                |
| Volume/Å <sup>3</sup>              | 3295.6(14)                                        |
| Z                                  | 4                                                 |
| ρ <sub>calc</sub> /cm <sup>3</sup> | 1.245                                             |
| μ/mm <sup>-1</sup>                 | 0.124                                             |

|                                                  |                                                                       |
|--------------------------------------------------|-----------------------------------------------------------------------|
| F(000)                                           | 1296.0                                                                |
| Crystal size/mm <sup>3</sup>                     | 0.28 × 0.16 × 0.12                                                    |
| Radiation                                        | MoK $\alpha$ ( $\lambda$ = 0.71073)                                   |
| 2 $\Theta$ range for data collection/ $^{\circ}$ | 3.832 to 54.308                                                       |
| Index ranges                                     | -18 $\leq$ h $\leq$ 18, -18 $\leq$ k $\leq$ 18, -2 $\leq$ l $\leq$ 19 |
| Reflections collected                            | 14509                                                                 |
| Independent reflections                          | 14509 [ $R_{\text{int}}$ = 0.0529, $R_{\text{sigma}}$ = 0.0552]       |
| Data/restraints/parameters                       | 14509/1/830                                                           |
| Goodness-of-fit on $F^2$                         | 1.047                                                                 |
| Final R indexes [ $I \geq 2\sigma(I)$ ]          | $R_1$ = 0.0360, $wR_2$ = 0.0865                                       |
| Final R indexes [all data]                       | $R_1$ = 0.0458, $wR_2$ = 0.0902                                       |
| Largest diff. peak/hole / e $\text{\AA}^{-3}$    | 0.33/-0.22                                                            |
| Flack parameter                                  | 0.04(2)                                                               |

---

The relative and absolute configurations of **3a'** (*S,4S,5R*) were assigned by X-ray crystallographic analysis of a single crystal of **3a'** (Figure S3). The crystal was prepared from the solution of **3a'** in PE/EtOAc = 3:1 at 25  $^{\circ}\text{C}$ .

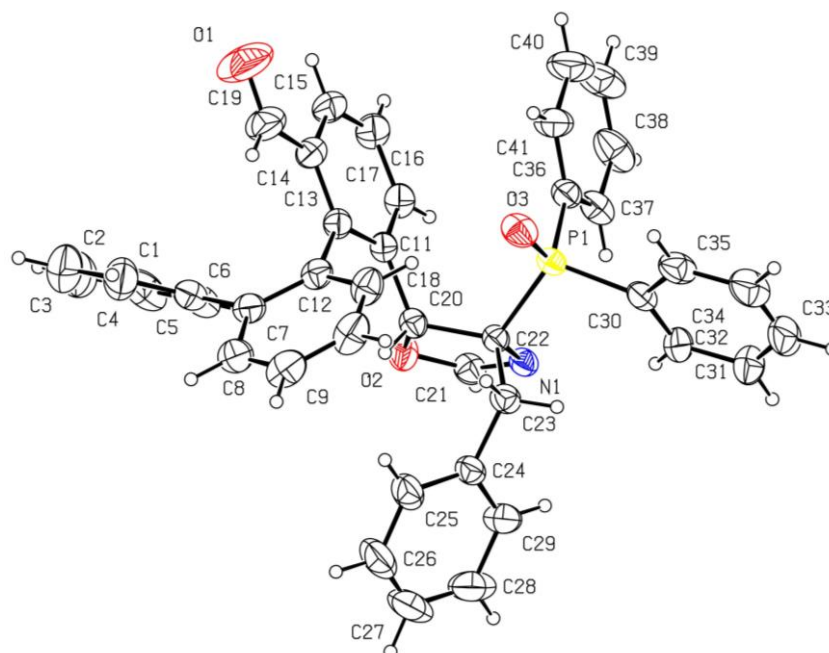

Figure S3. X-ray structure of **3a'** (ellipsoid contour at 30% probability)

Table S2. Crystal data and structure refinement for cu\_221208\_HF\_Ph\_model\_dr\_sq

|                                        |                                                               |
|----------------------------------------|---------------------------------------------------------------|
| Identification code                    | cu_221208_HF_Ph_model_dr_sq                                   |
| Empirical formula                      | C <sub>41</sub> H <sub>32</sub> NO <sub>3</sub> P             |
| Formula weight                         | 617.64                                                        |
| Temperature/K                          | 298.00                                                        |
| Crystal system                         | orthorhombic                                                  |
| Space group                            | P2 <sub>1</sub> 2 <sub>1</sub> 2                              |
| a/Å                                    | 13.7964(3)                                                    |
| b/Å                                    | 25.0930(6)                                                    |
| c/Å                                    | 10.7544(3)                                                    |
| $\alpha$ /°                            | 90                                                            |
| $\beta$ /°                             | 90                                                            |
| $\gamma$ /°                            | 90                                                            |
| Volume/Å <sup>3</sup>                  | 3723.10(16)                                                   |
| Z                                      | 4                                                             |
| $\rho_{\text{calc}}$ /cm <sup>3</sup>  | 1.102                                                         |
| $\mu$ /mm <sup>-1</sup>                | 0.932                                                         |
| F(000)                                 | 1296.0                                                        |
| Crystal size/mm <sup>3</sup>           | 0.45 × 0.3 × 0.26                                             |
| Radiation                              | CuK $\alpha$ ( $\lambda$ = 1.54178)                           |
| 2 $\Theta$ range for data collection/° | 8.222 to 136.244                                              |
| Index ranges                           | -16 ≤ h ≤ 16, -29 ≤ k ≤ 30, -12 ≤ l ≤ 12                      |
| Reflections collected                  | 35451                                                         |
| Independent reflections                | 6754 [R <sub>int</sub> = 0.0406, R <sub>sigma</sub> = 0.0306] |
| Data/restraints/parameters             | 6754/0/415                                                    |
| Goodness-of-fit on F <sup>2</sup>      | 1.024                                                         |
| Final R indexes [I ≥ 2 $\sigma$ (I)]   | R <sub>1</sub> = 0.0325, wR <sub>2</sub> = 0.0854             |

|                                             |                                                   |
|---------------------------------------------|---------------------------------------------------|
| Final R indexes [all data]                  | R <sub>1</sub> = 0.0364, wR <sub>2</sub> = 0.0882 |
| Largest diff. peak/hole / e Å <sup>-3</sup> | 0.14/-0.23                                        |
| Flack parameter                             | 0.023(8)                                          |

---

## X. References

- 1 Y. Wu, M. Li, J. Sun, G. Zheng and Q. Zhang, *Angew. Chem. Int. Ed.*, 2022, **61**, e202117340.
- 2 Y. Xiong, Z. Du, H. Chen, Z. Yang, Q. Tan, C. Zhang, L. Zhu, Y. Lan and M. Zhang, *J. Am. Chem. Soc.*, 2019, **141**, 961-971.
- 3 (a) F. Sladojevich, A. Trabocchi, A. Guarna and D. J. Dixon, *J. Am. Chem. Soc.*, 2011, **133**, 1710-1713; (b) P.-L. Shao, J.-Y. Liao, Y. A. Ho and Y. Zhao, *Angew. Chem. Int. Ed.*, 2014, **53**, 5435-5439.
- 4 Z.-P. Wang, Q. Wu, J. Jiang, Z.-R. Li, X.-J. Peng, P.-L. Shao and Y. He, *Org. Chem. Front.*, 2018, **5**, 36-40.
- 5 X.-L. He, H.-R. Zhao, X. Song, B. Jiang, W. Du and Y.-C. Chen, *ACS Catal.*, 2019, **9**, 4374-4381.

## XI. NMR spectra

### $^1\text{H}$ NMR (400 MHz, $\text{CDCl}_3$ )

8.03  
8.03  
8.03  
8.01  
8.01  
8.00  
8.00  
7.98  
7.92  
7.91  
7.90  
7.89  
7.89  
7.88  
7.87  
7.86  
7.88  
7.88  
7.88  
7.86  
7.83  
7.63  
7.62  
7.61  
7.61  
7.60  
7.60  
7.59  
7.59  
7.58  
7.58  
7.57  
7.57  
7.57  
7.56  
7.56  
7.55  
7.55  
7.54  
7.53  
7.53  
7.33  
7.31  
7.30  
7.30  
7.29  
7.29  
7.29  
7.28  
7.28  
7.27  
7.26  
7.24  
7.24  
7.23  
7.23  
7.22  
7.22  
4.48  
4.47  
4.47

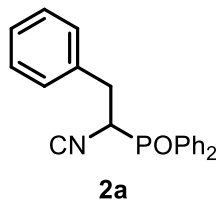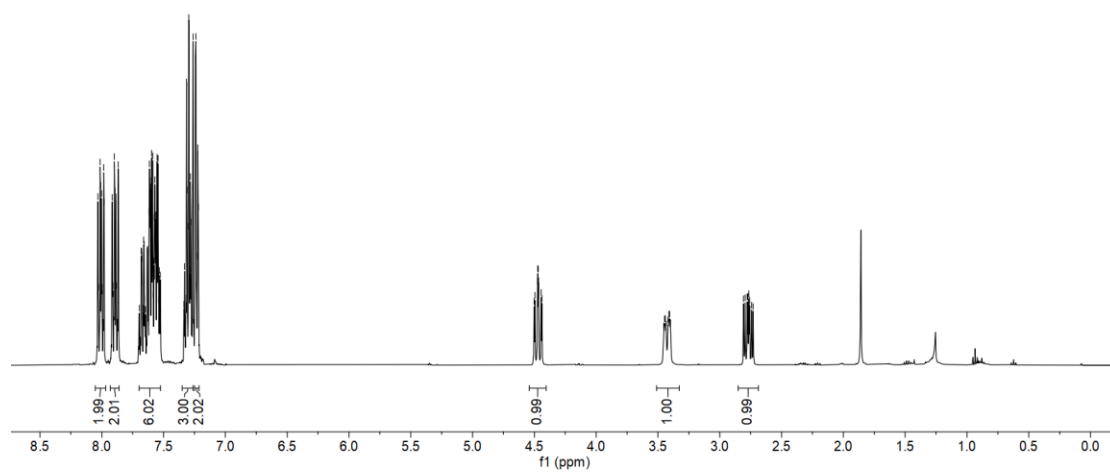

### $^{13}\text{C}$ NMR (101 MHz, $\text{CDCl}_3$ )

182.63  
135.86  
135.75  
133.37  
133.34  
133.25  
133.22  
132.59  
132.51  
131.61  
131.52  
129.70  
129.28  
129.24  
129.16  
129.08  
128.96  
128.83  
127.69  
126.65  
56.42  
55.72  
34.89

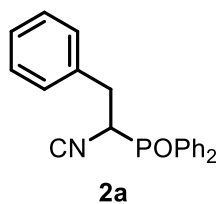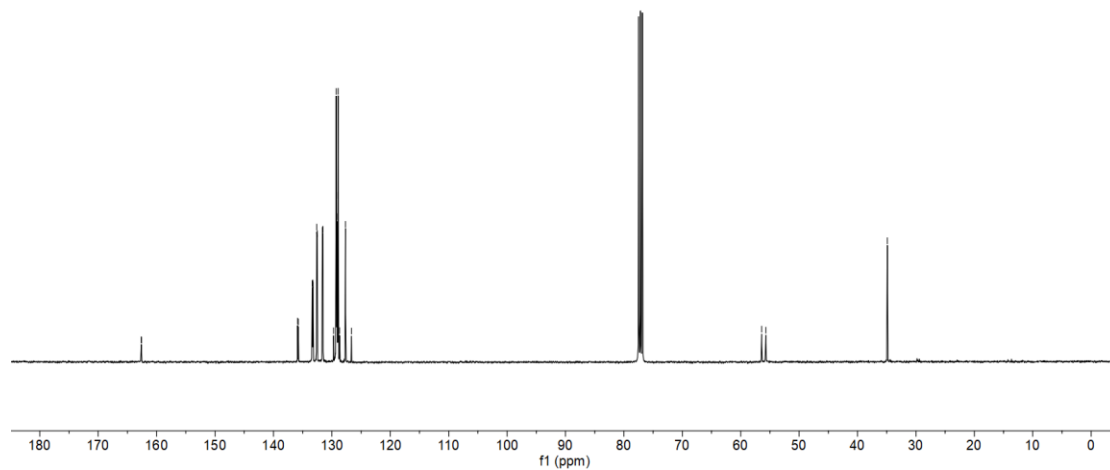

<sup>31</sup>P NMR (162 MHz, CDCl<sub>3</sub>)

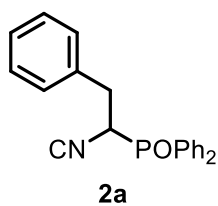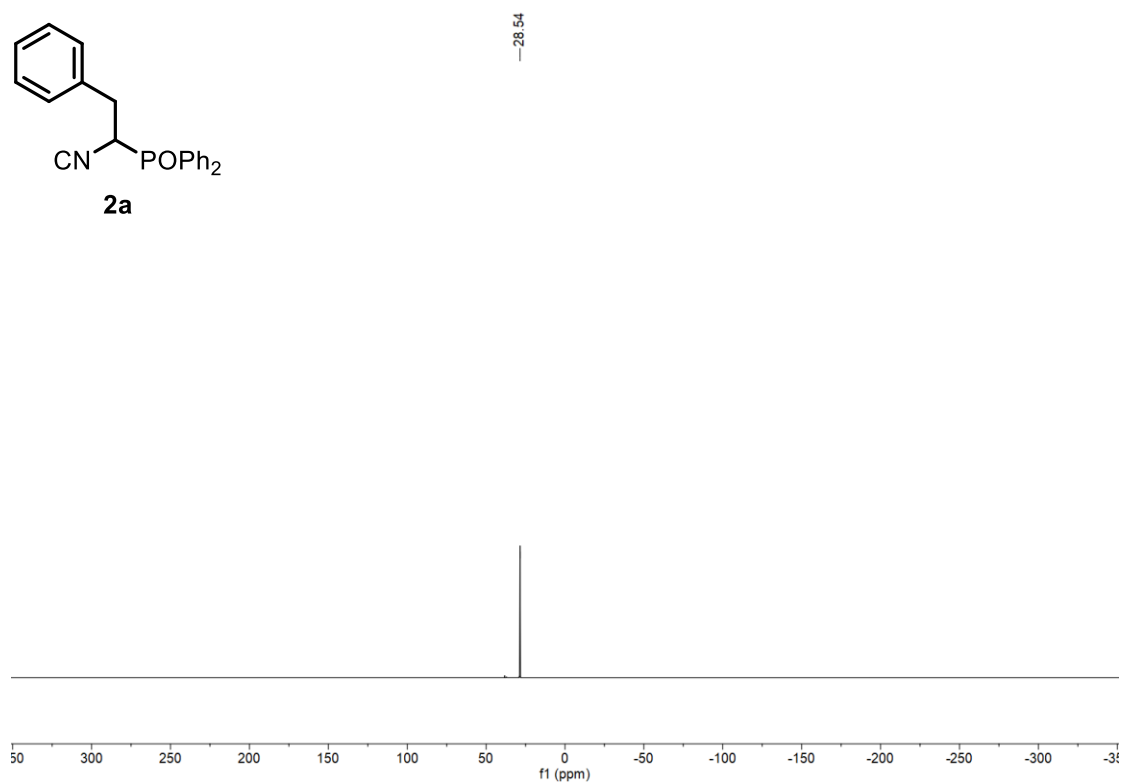

<sup>1</sup>H NMR (400 MHz, CDCl<sub>3</sub>)

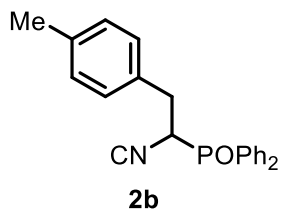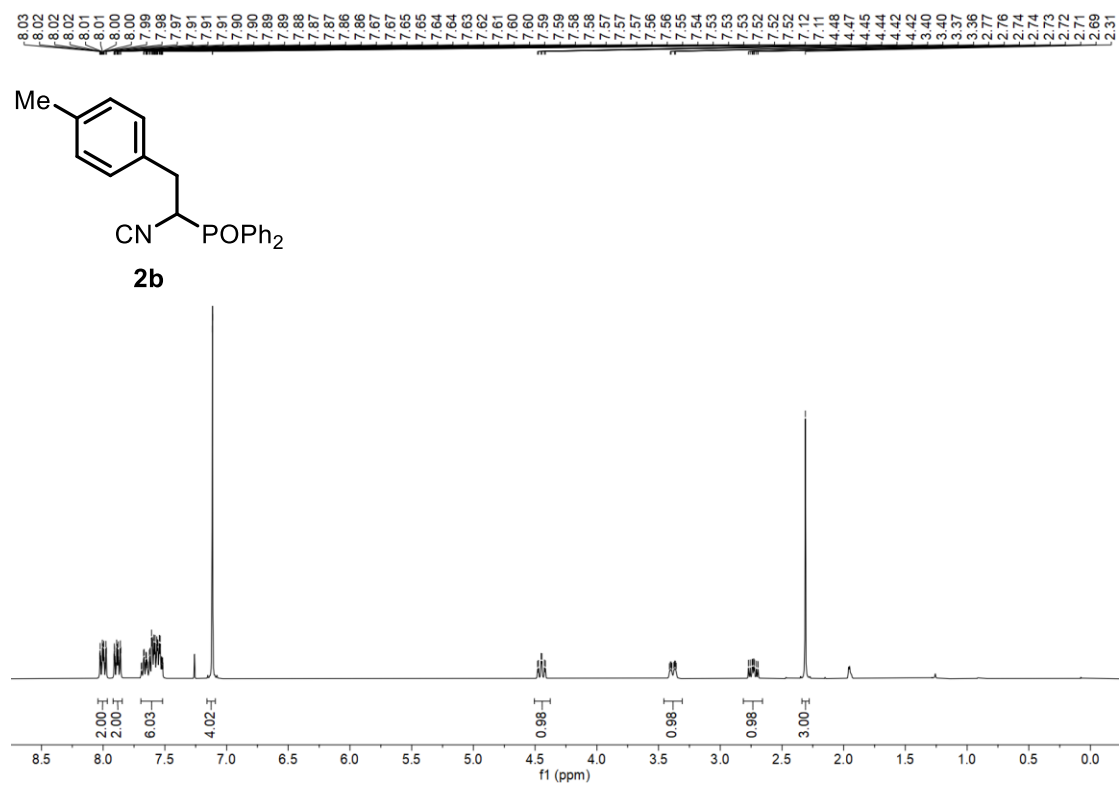

<sup>13</sup>C NMR (101 MHz, CDCl<sub>3</sub>)

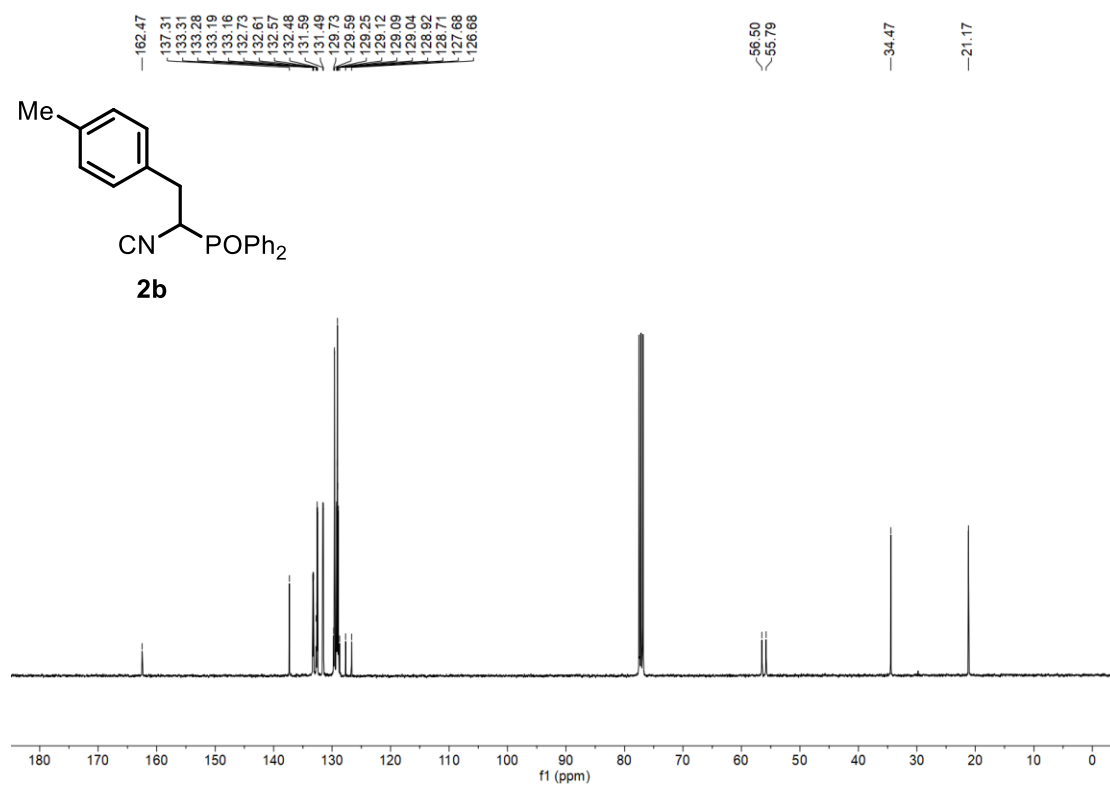

<sup>31</sup>P NMR (162 MHz, CDCl<sub>3</sub>)

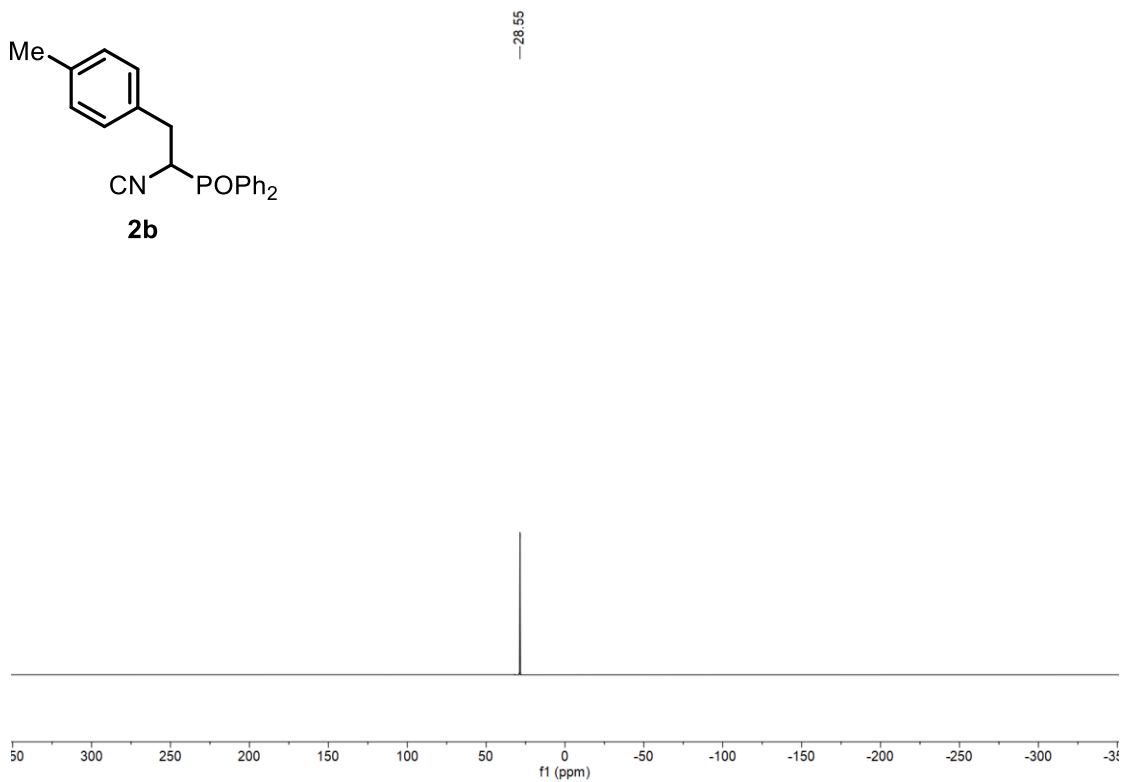



<sup>1</sup>H NMR (400 MHz, CDCl<sub>3</sub>)

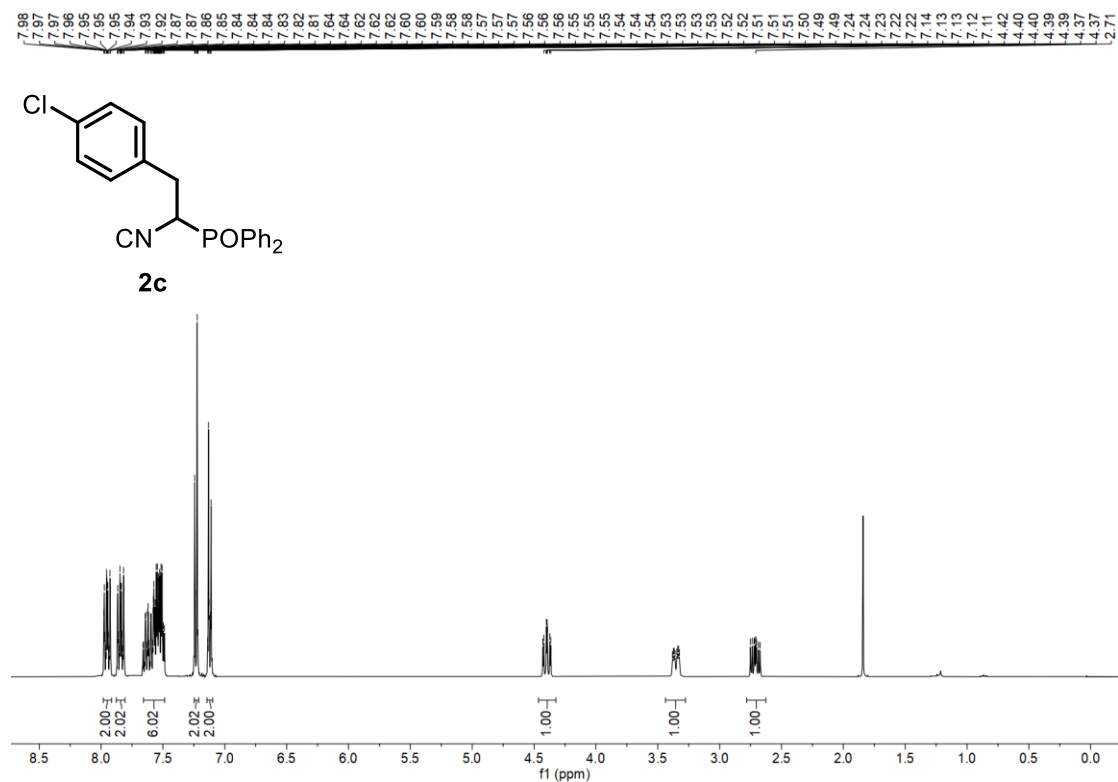

<sup>13</sup>C NMR (101 MHz, CDCl<sub>3</sub>)

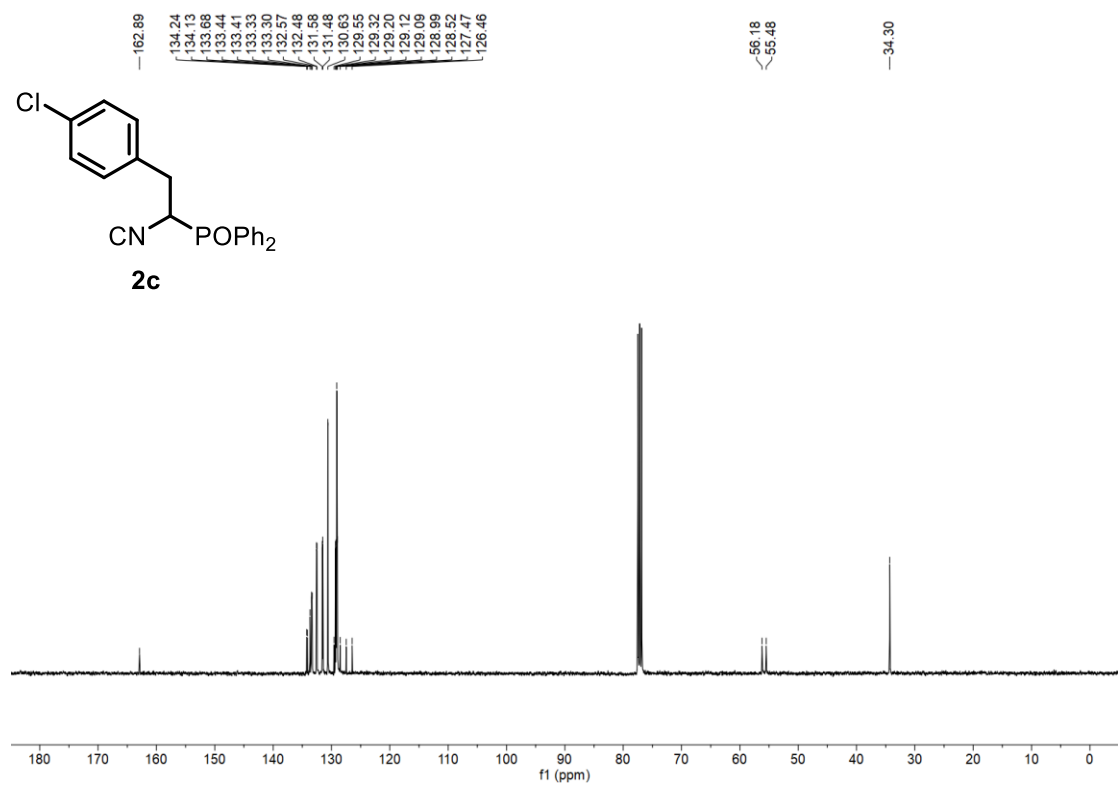

**<sup>31</sup>P NMR (162 MHz, CDCl<sub>3</sub>)**

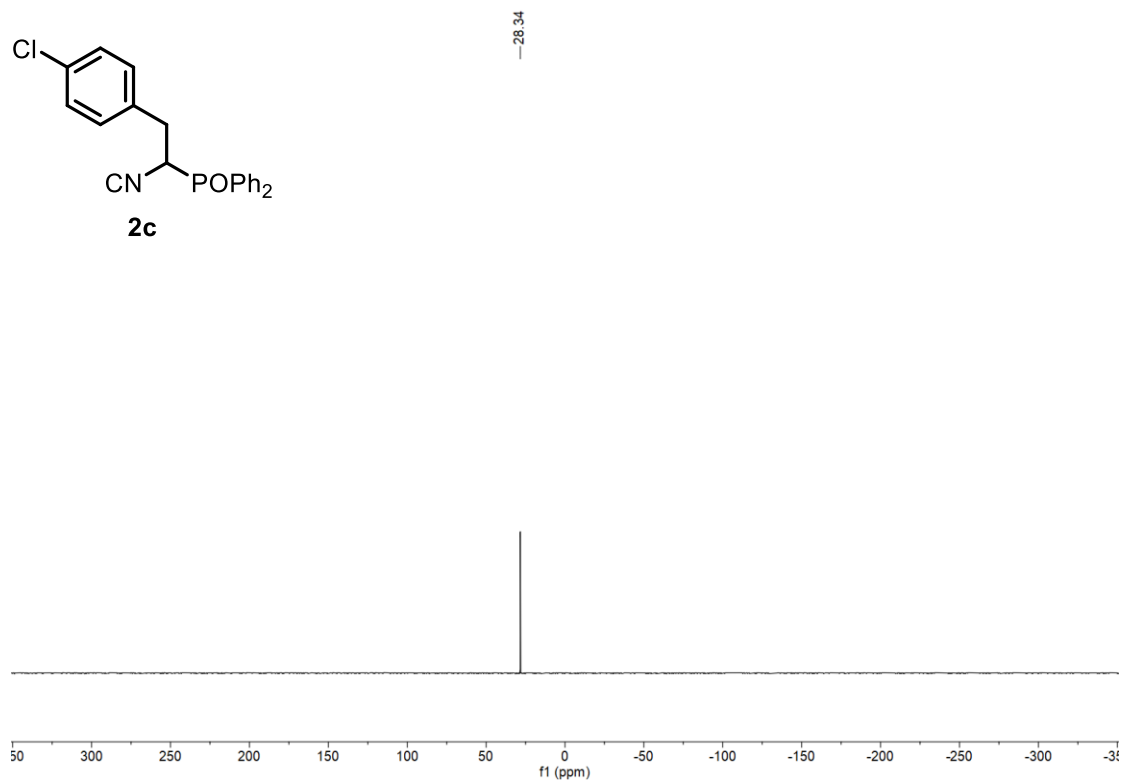

**<sup>1</sup>H NMR (400 MHz, CDCl<sub>3</sub>)**

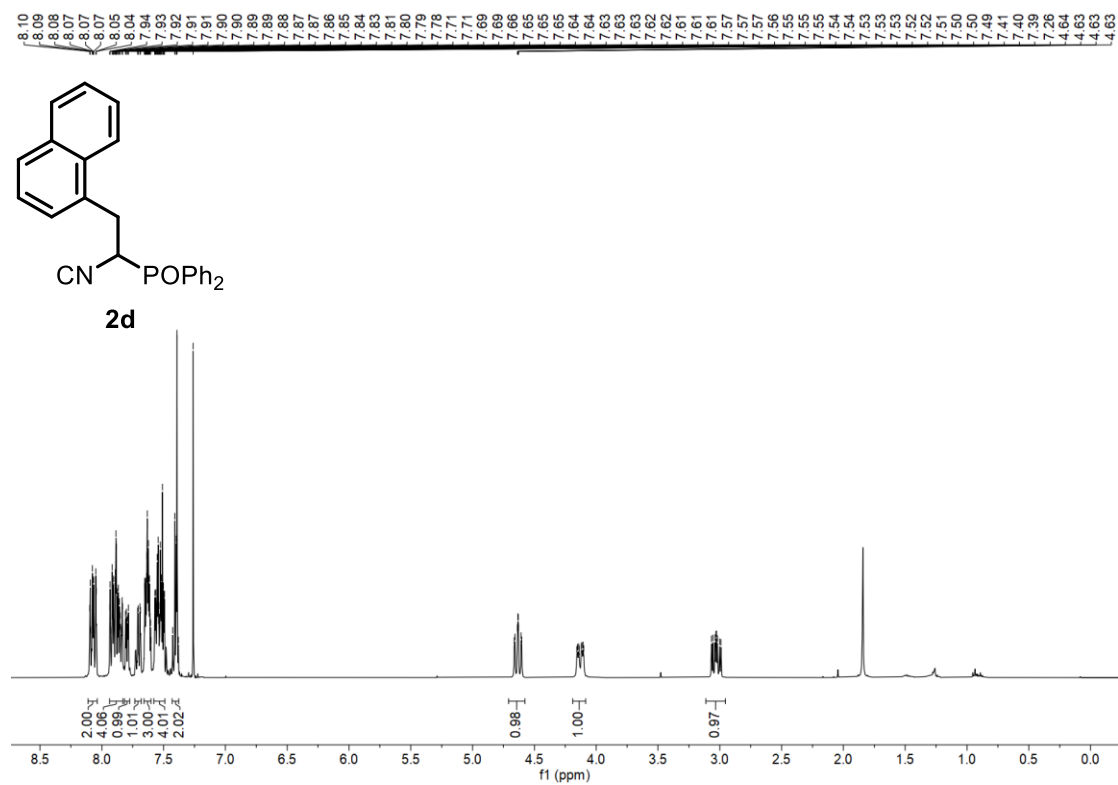

<sup>13</sup>C NMR (101 MHz, CDCl<sub>3</sub>)

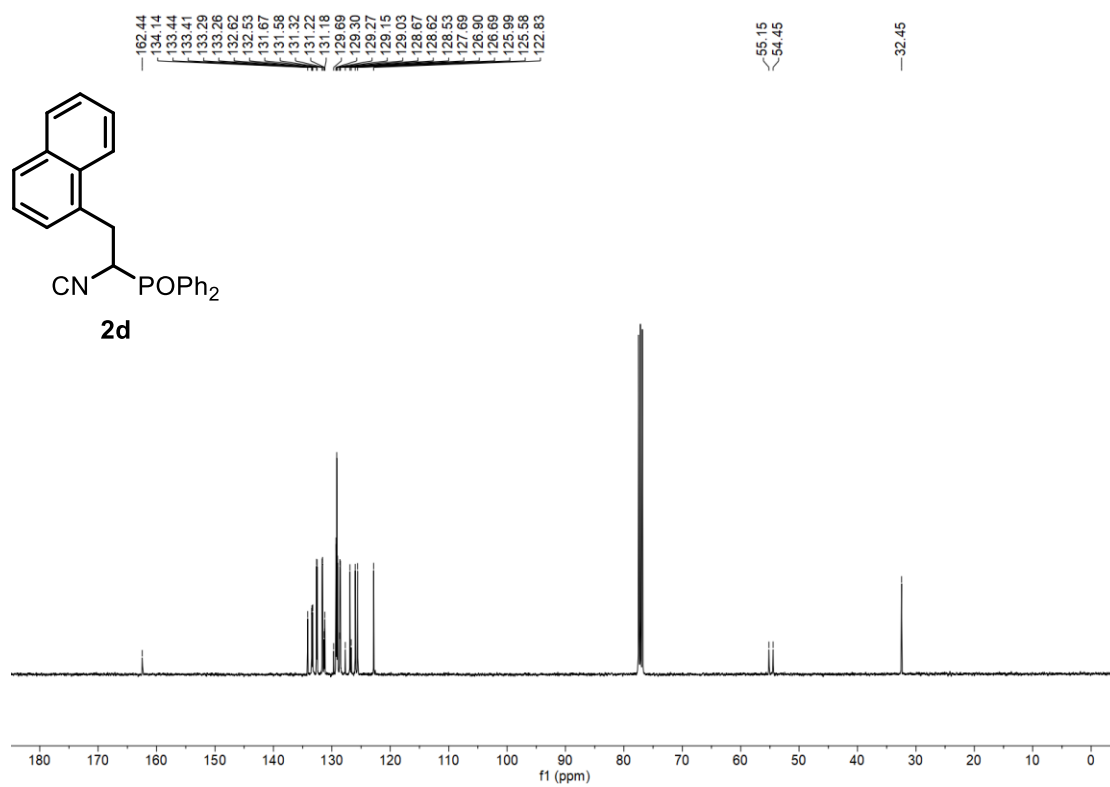

<sup>31</sup>P NMR (162 MHz, CDCl<sub>3</sub>)

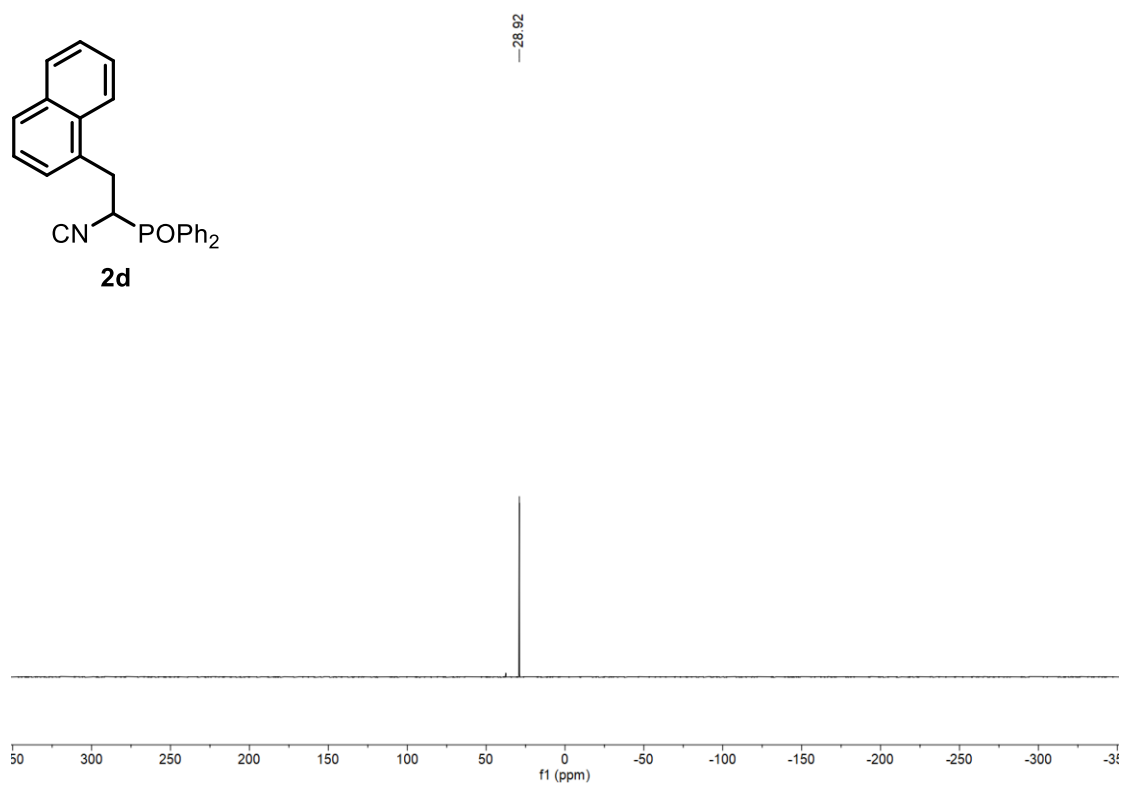

# <sup>1</sup>H NMR (400 MHz, CDCl<sub>3</sub>)

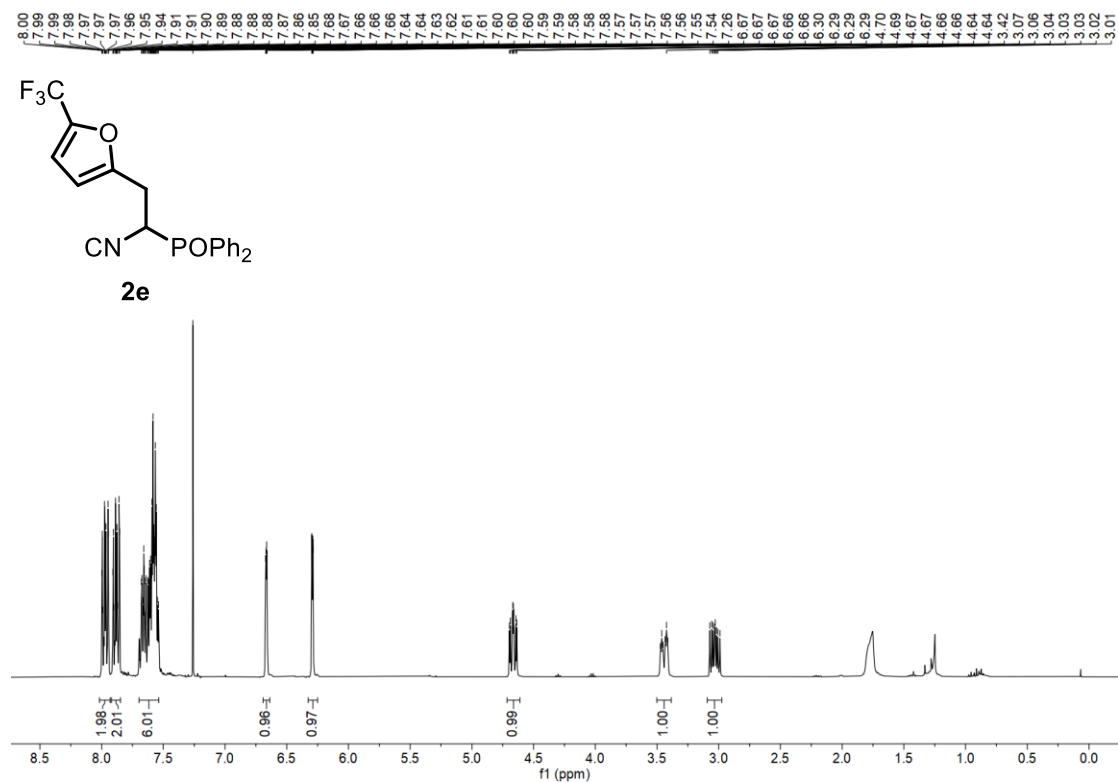

# <sup>13</sup>C NMR (101 MHz, CDCl<sub>3</sub>)

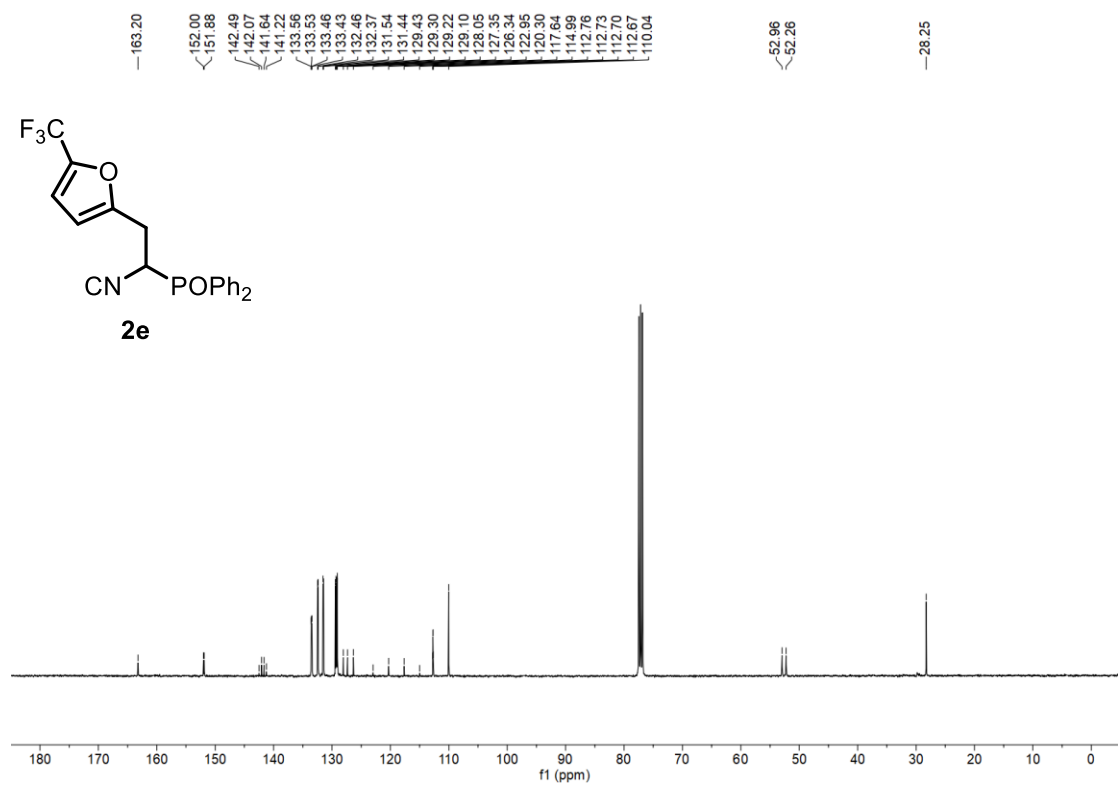

**<sup>19</sup>F NMR** (376 MHz, CDCl<sub>3</sub>)

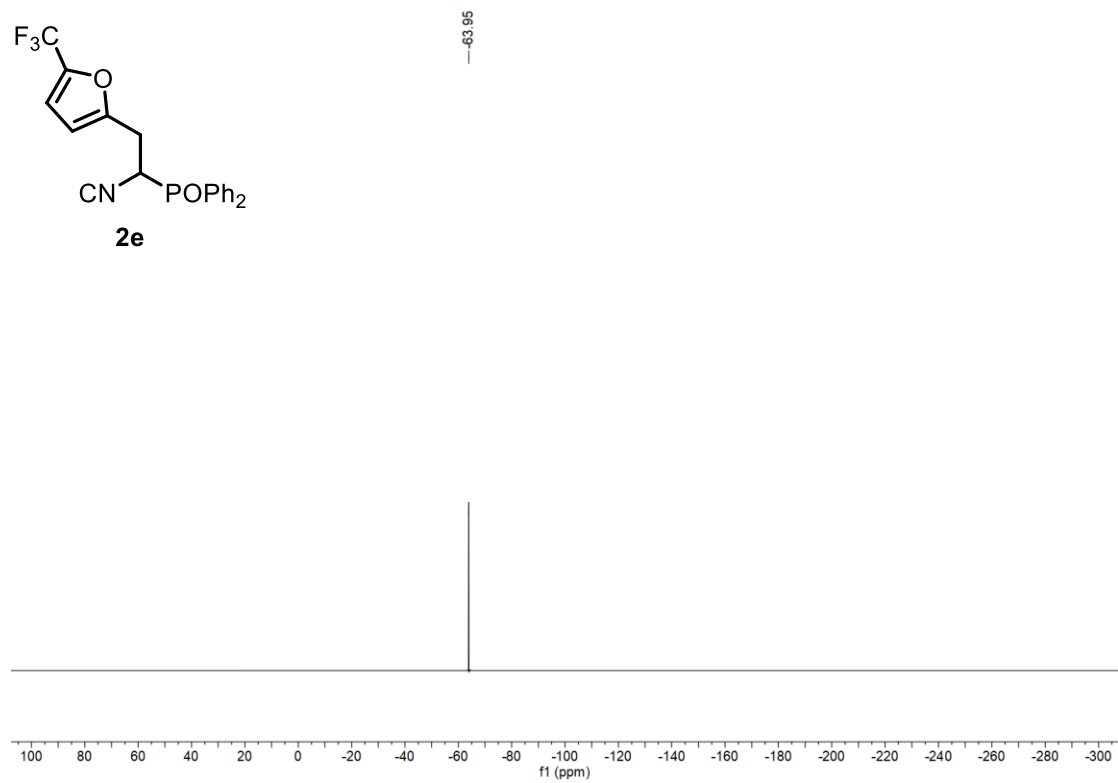

**<sup>31</sup>P NMR** (162 MHz, CDCl<sub>3</sub>)

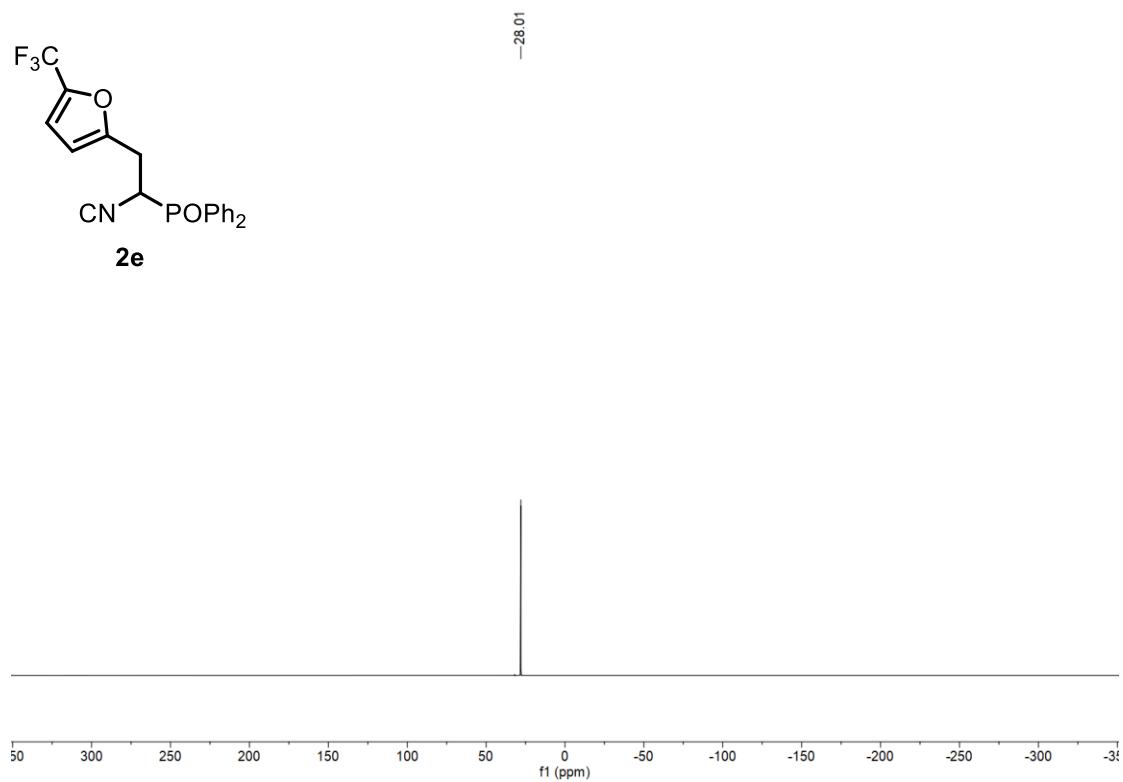

**<sup>1</sup>H NMR (400 MHz, CDCl<sub>3</sub>)**

7.97  
7.97  
7.96  
7.95  
7.95  
7.94  
7.94  
7.93  
7.93  
7.92  
7.88  
7.88  
7.89  
7.86  
7.88  
7.85  
7.85  
7.85  
7.84  
7.83  
7.83  
7.65  
7.65  
7.64  
7.64  
7.63  
7.62  
7.62  
7.60  
7.60  
7.59  
7.58  
7.58  
7.56  
7.57  
7.57  
7.56  
7.55  
7.55  
7.54  
7.54  
7.53  
7.53  
7.52  
7.52  
7.51  
7.26  
4.47  
4.45  
4.44  
4.43  
4.42  
4.41  
4.40  
4.39  
1.61  
1.59  
1.57

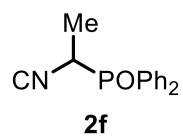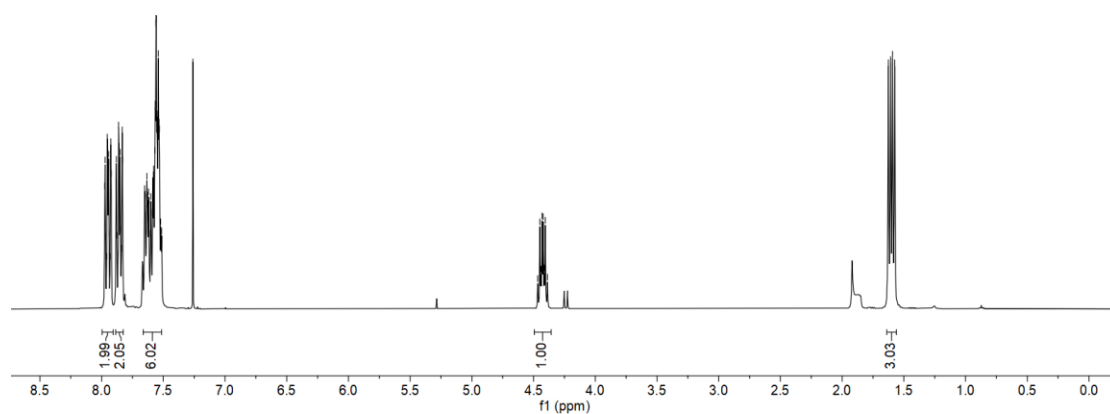

**<sup>13</sup>C NMR (101 MHz, CDCl<sub>3</sub>)**

161.20  
133.27  
133.24  
133.17  
133.14  
132.56  
132.47  
131.63  
128.69  
128.22  
128.09  
128.00  
128.88  
128.68  
127.45  
126.44  
49.00  
48.27  
15.41

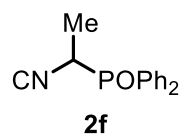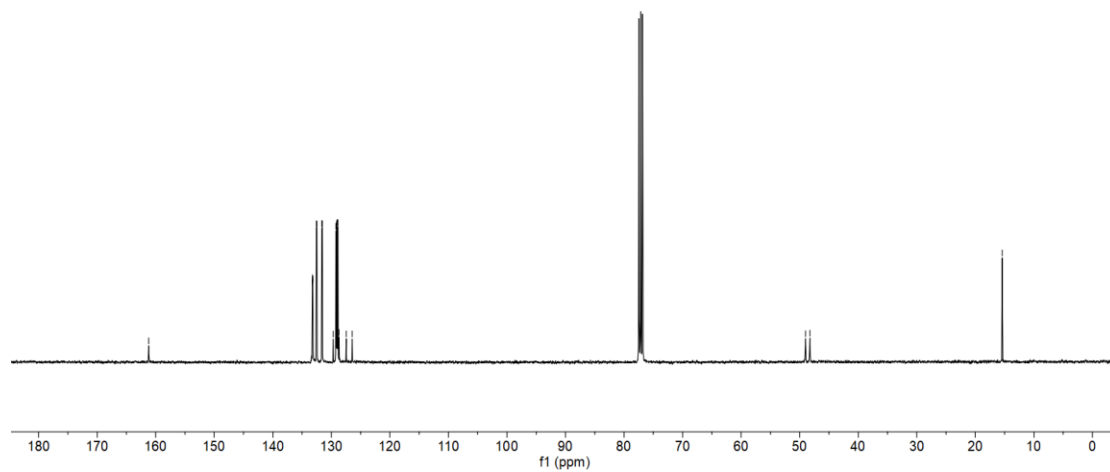

**<sup>31</sup>P NMR (162 MHz, CDCl<sub>3</sub>)**

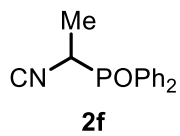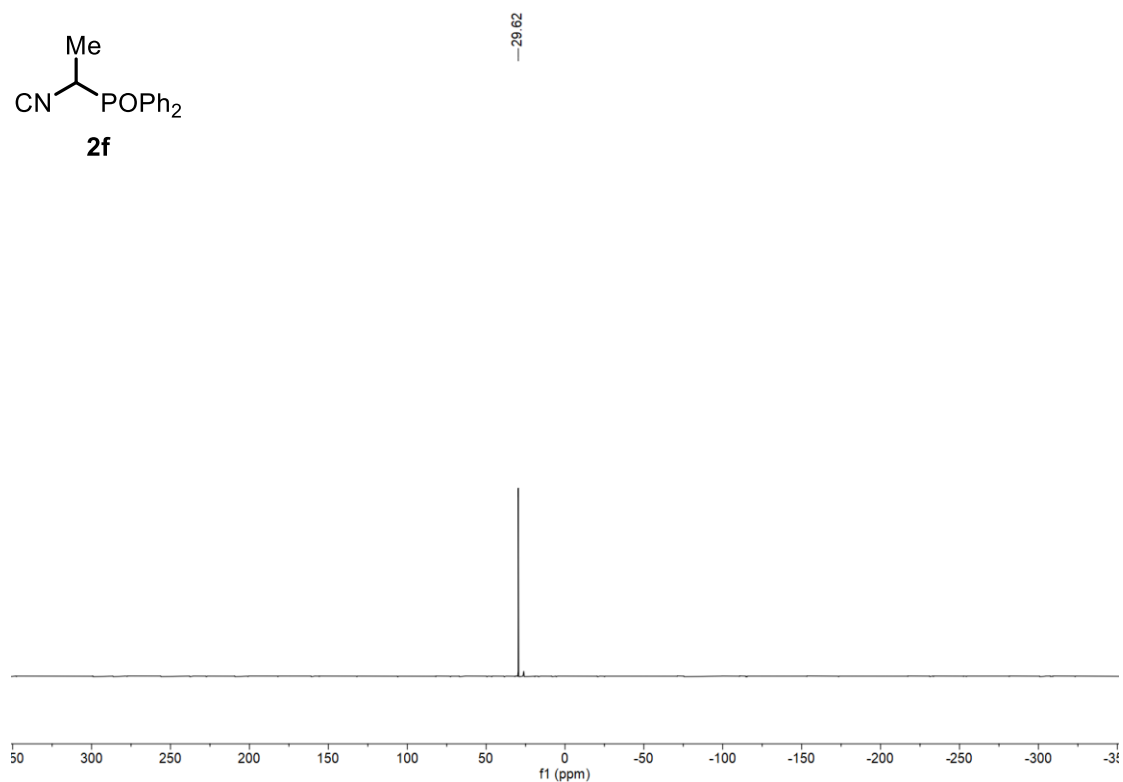

**<sup>1</sup>H NMR (400 MHz, DMSO-*d*<sub>6</sub>)**

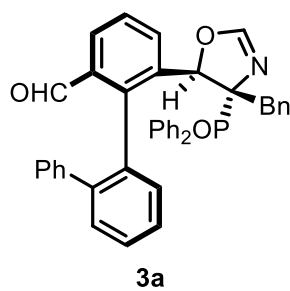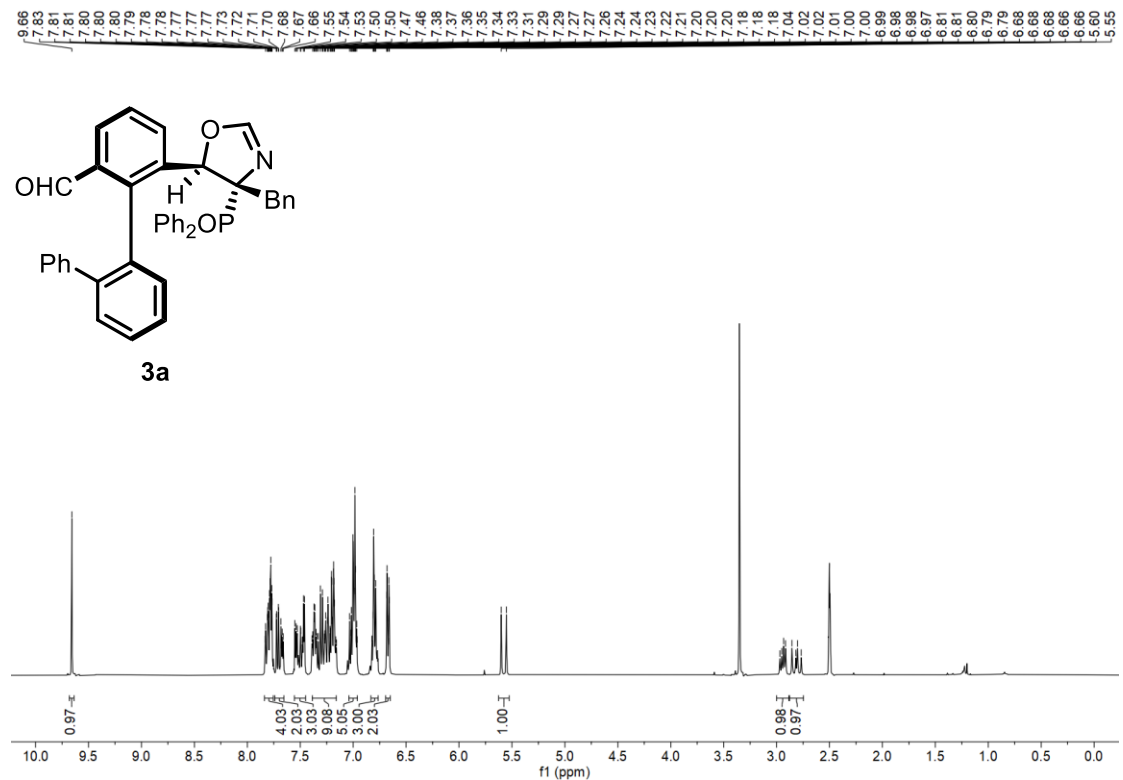

<sup>13</sup>C NMR (101 MHz, DMSO-*d*<sub>6</sub>)

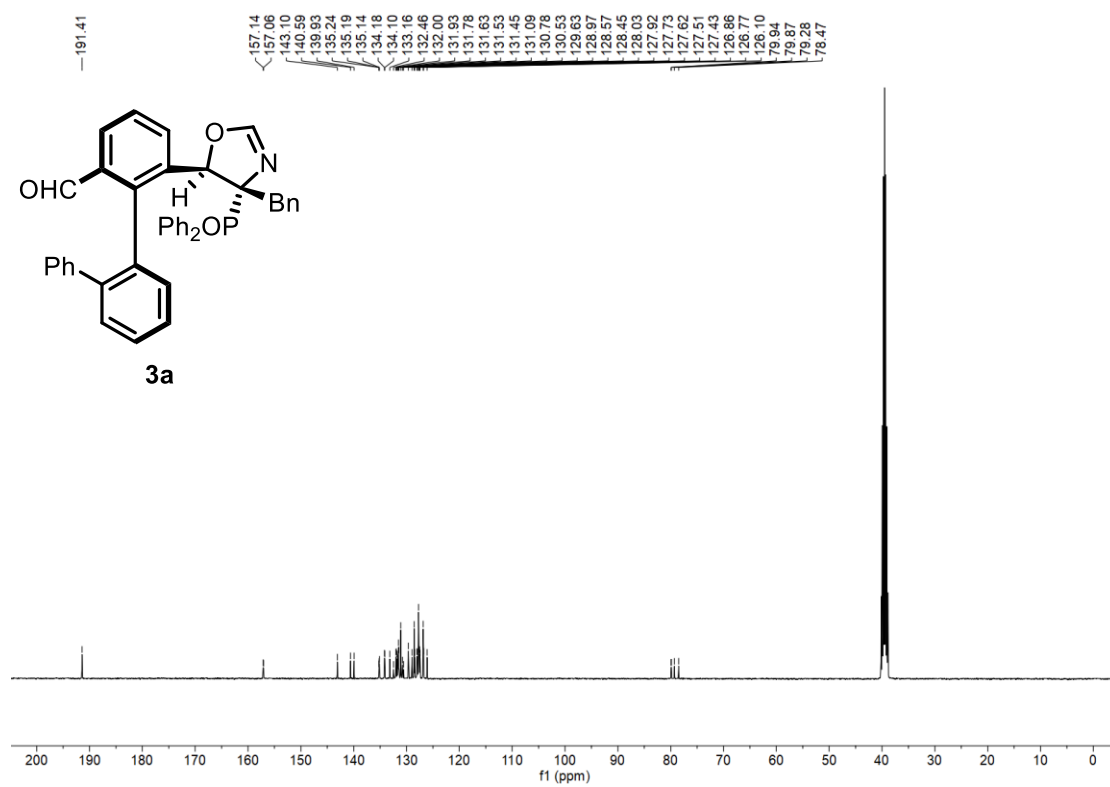

<sup>31</sup>P NMR (162 MHz, DMSO-*d*<sub>6</sub>)

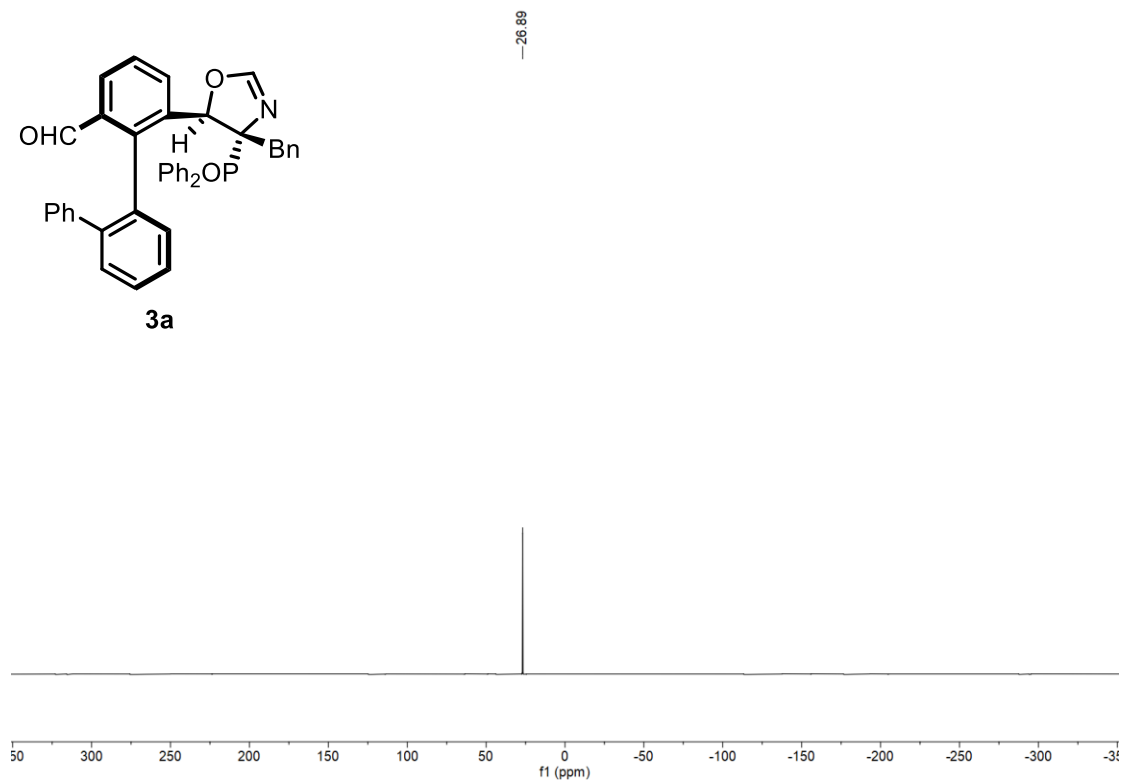



<sup>1</sup>H NMR (400 MHz, CDCl<sub>3</sub>)

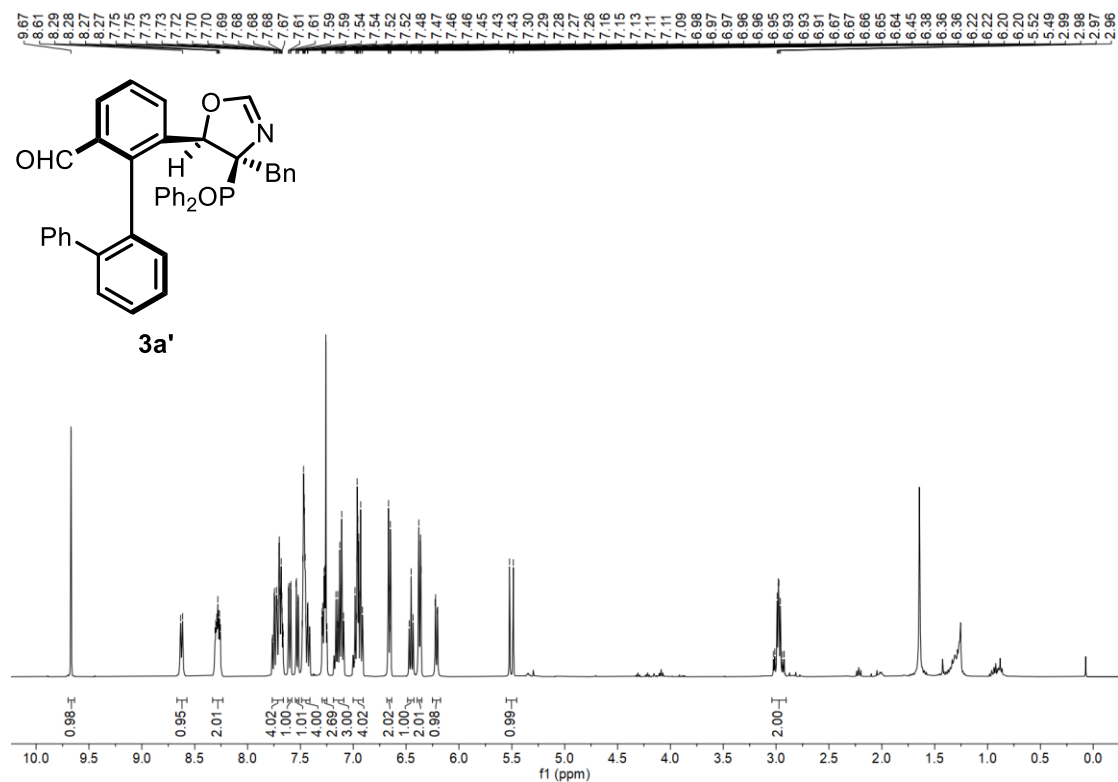

<sup>13</sup>C NMR (101 MHz, CDCl<sub>3</sub>)

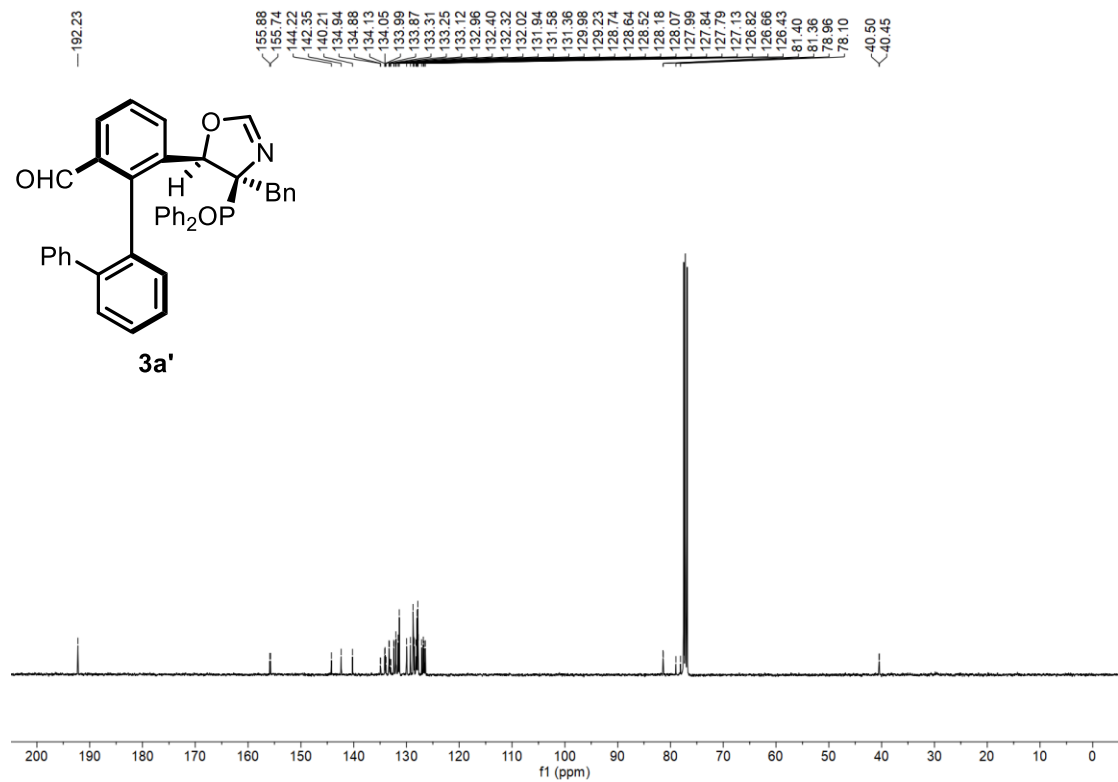

**<sup>31</sup>P NMR (162 MHz, CDCl<sub>3</sub>)**

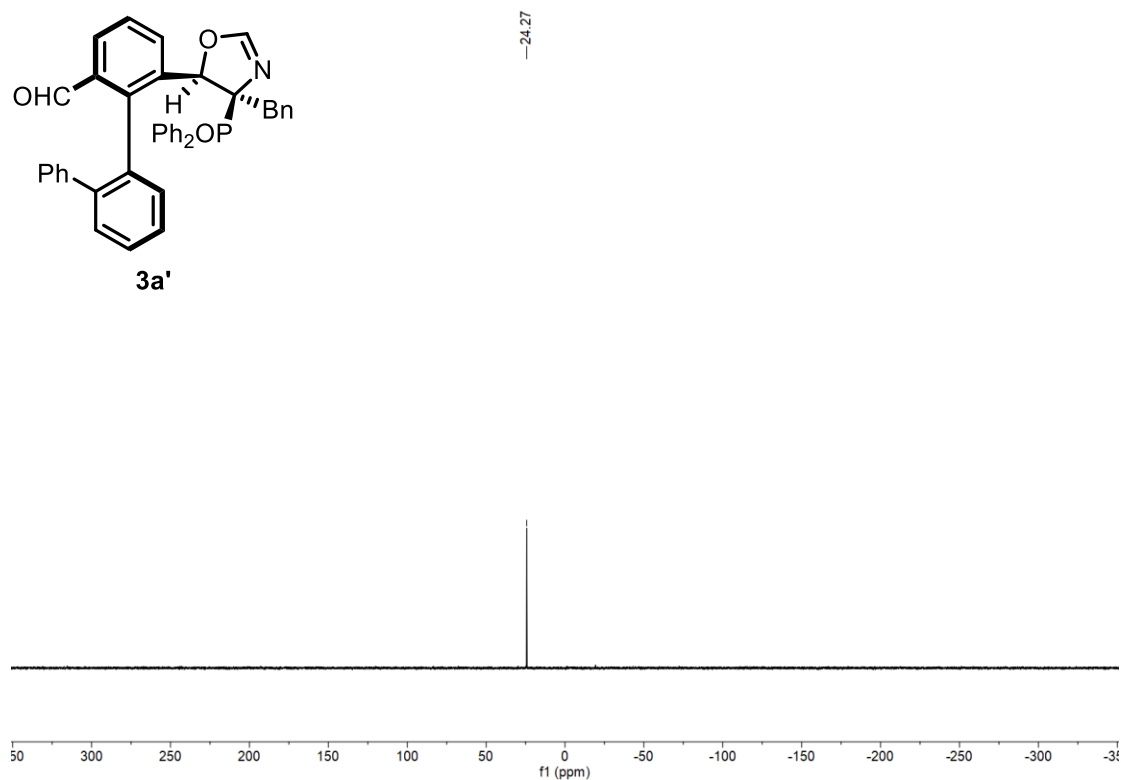

**<sup>1</sup>H NMR (400 MHz, DMSO-*d*<sub>6</sub>)**

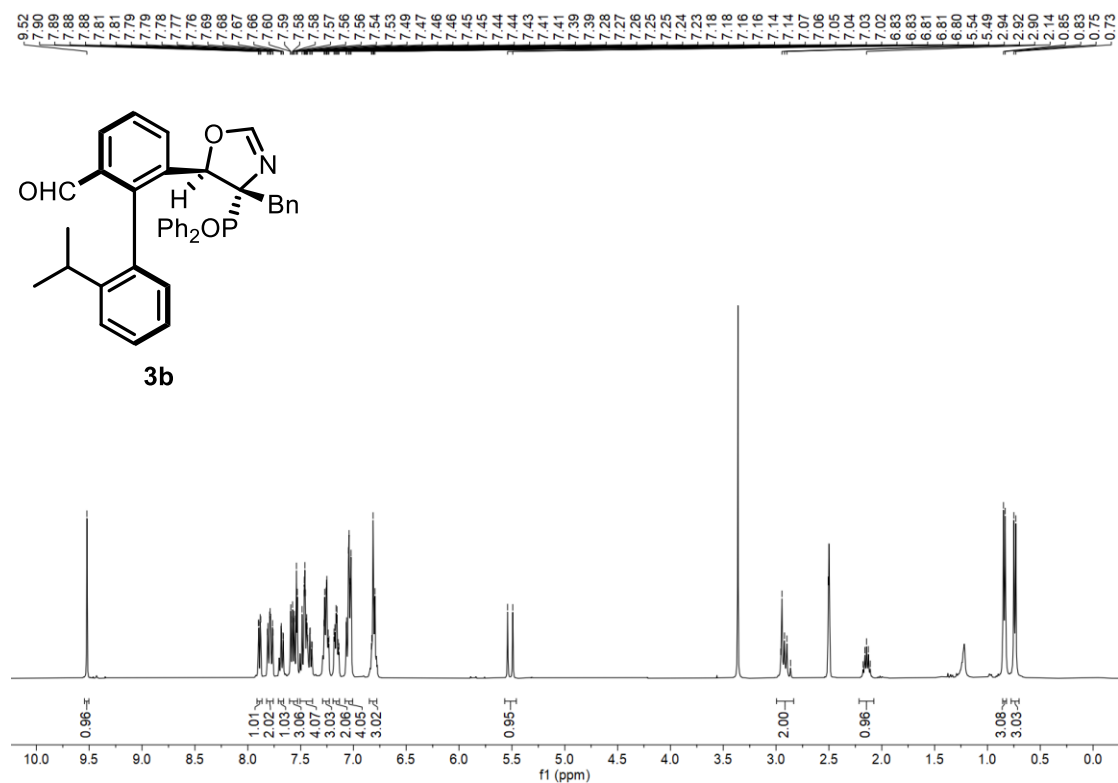

<sup>13</sup>C NMR (101 MHz, DMSO-*d*<sub>6</sub>)

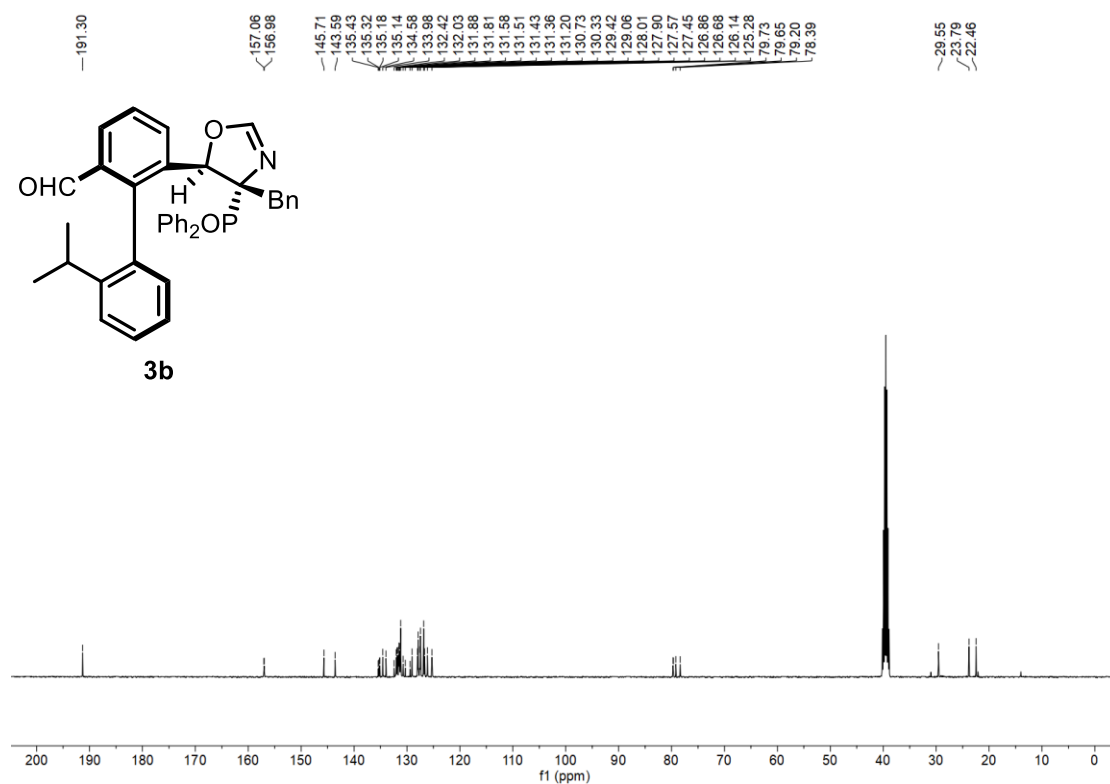

<sup>31</sup>P NMR (162 MHz, DMSO-*d*<sub>6</sub>)

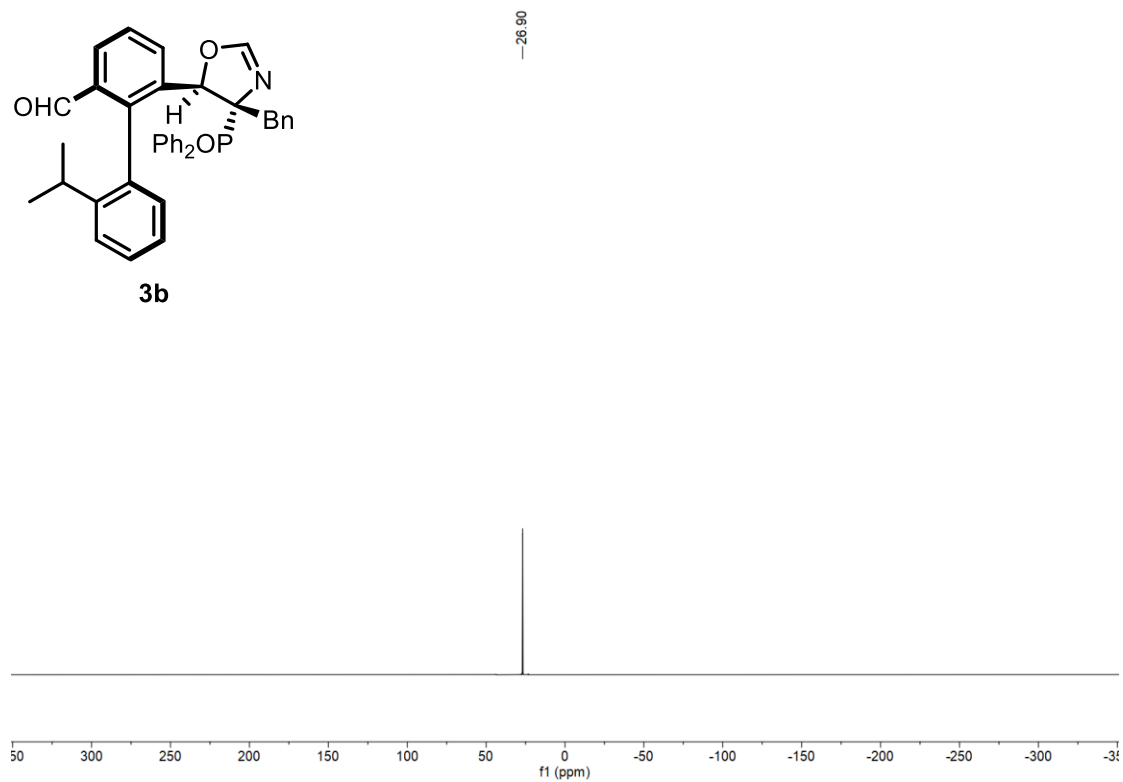

<sup>1</sup>H NMR (400 MHz, CDCl<sub>3</sub>)

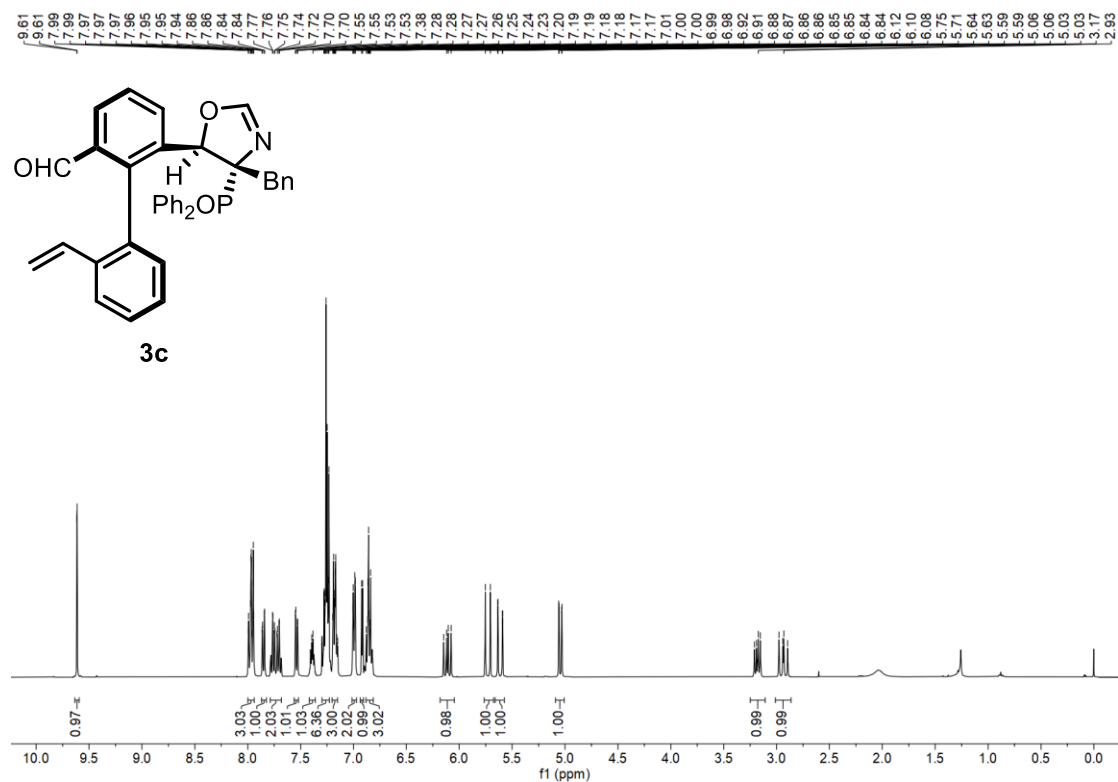

<sup>13</sup>C NMR (101 MHz, CDCl<sub>3</sub>)

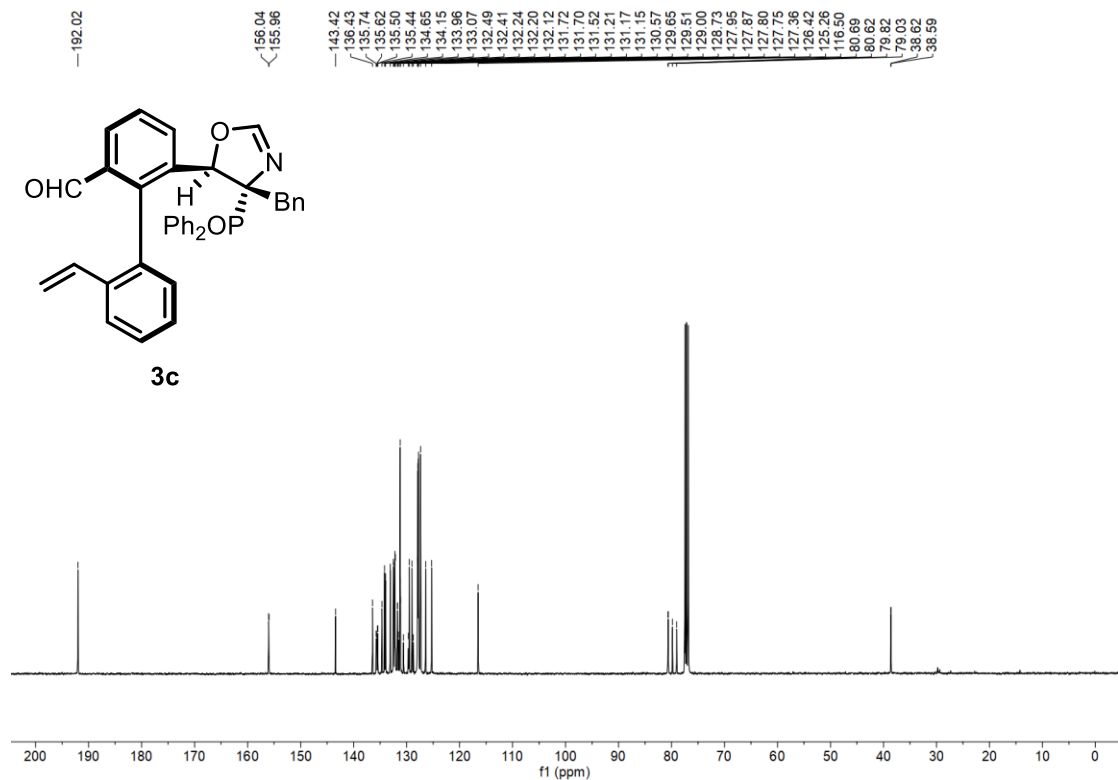

**<sup>31</sup>P NMR (162 MHz, CDCl<sub>3</sub>)**

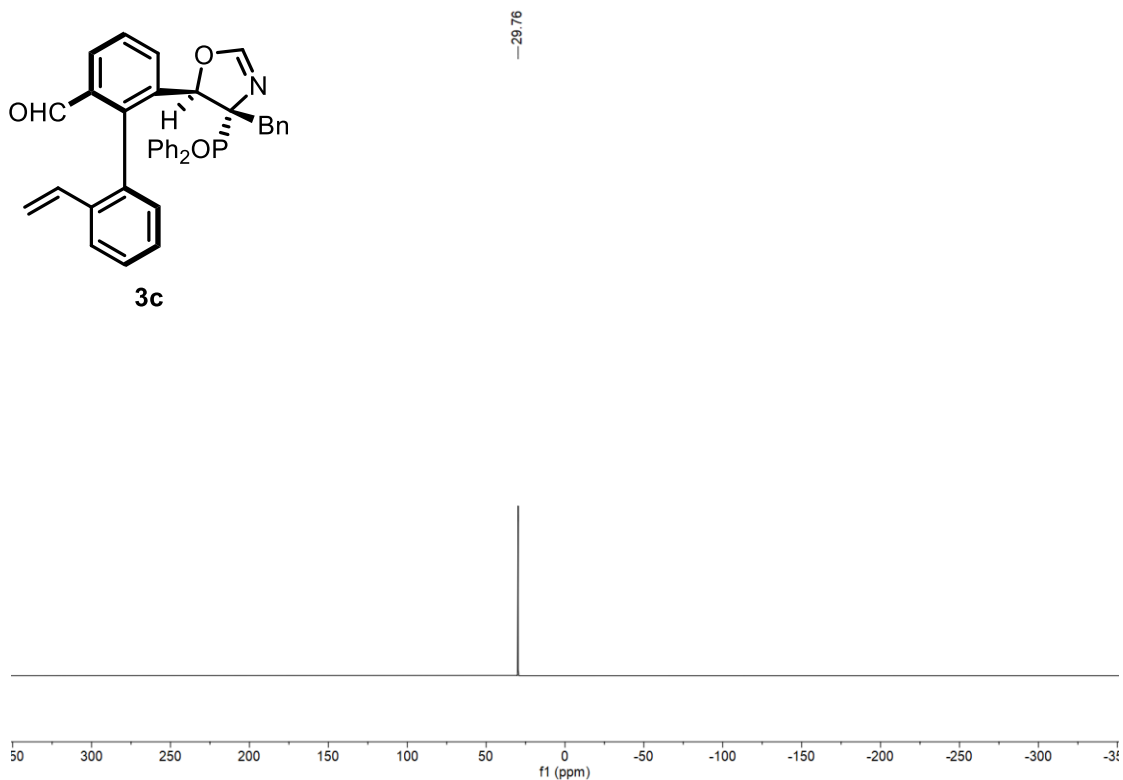

**<sup>1</sup>H NMR (400 MHz, CDCl<sub>3</sub>)**

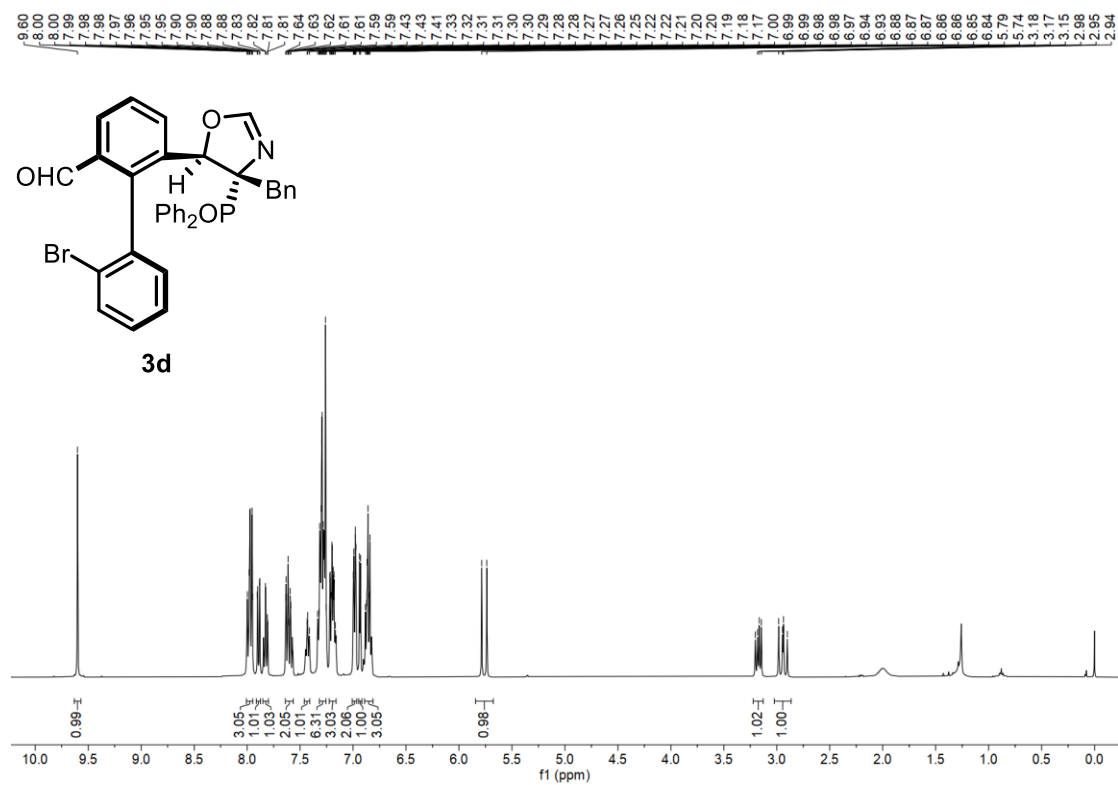

<sup>13</sup>C NMR (101 MHz, CDCl<sub>3</sub>)

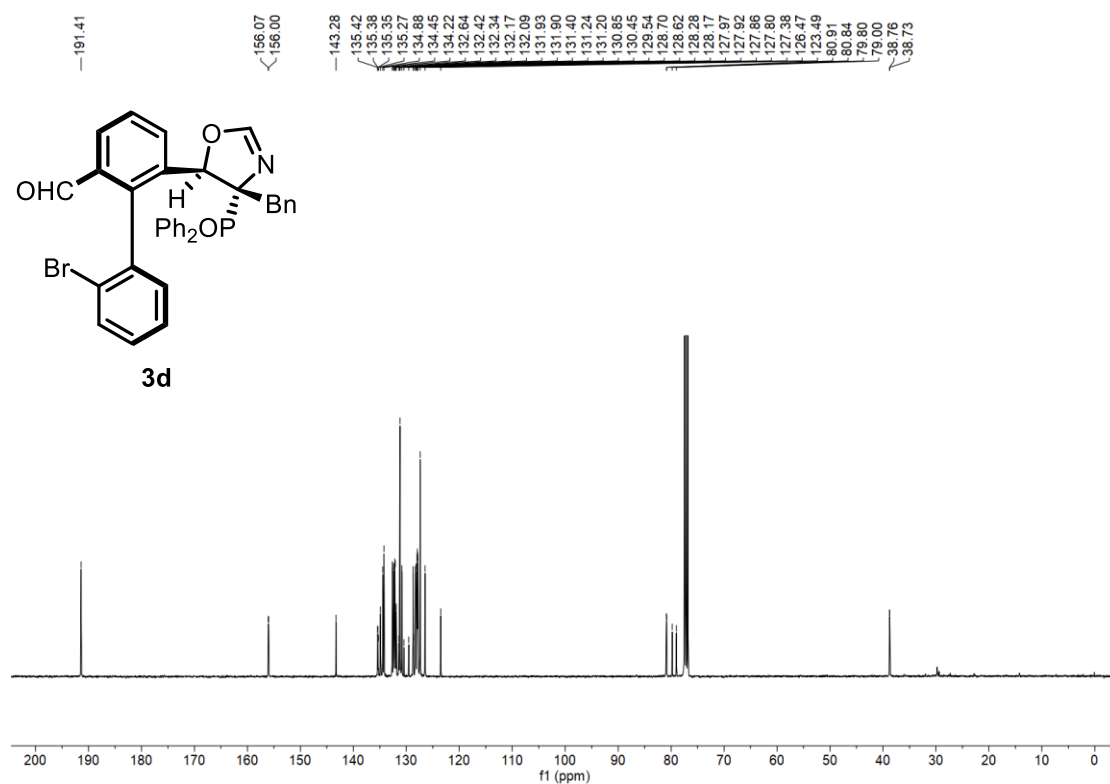

<sup>31</sup>P NMR (162 MHz, CDCl<sub>3</sub>)

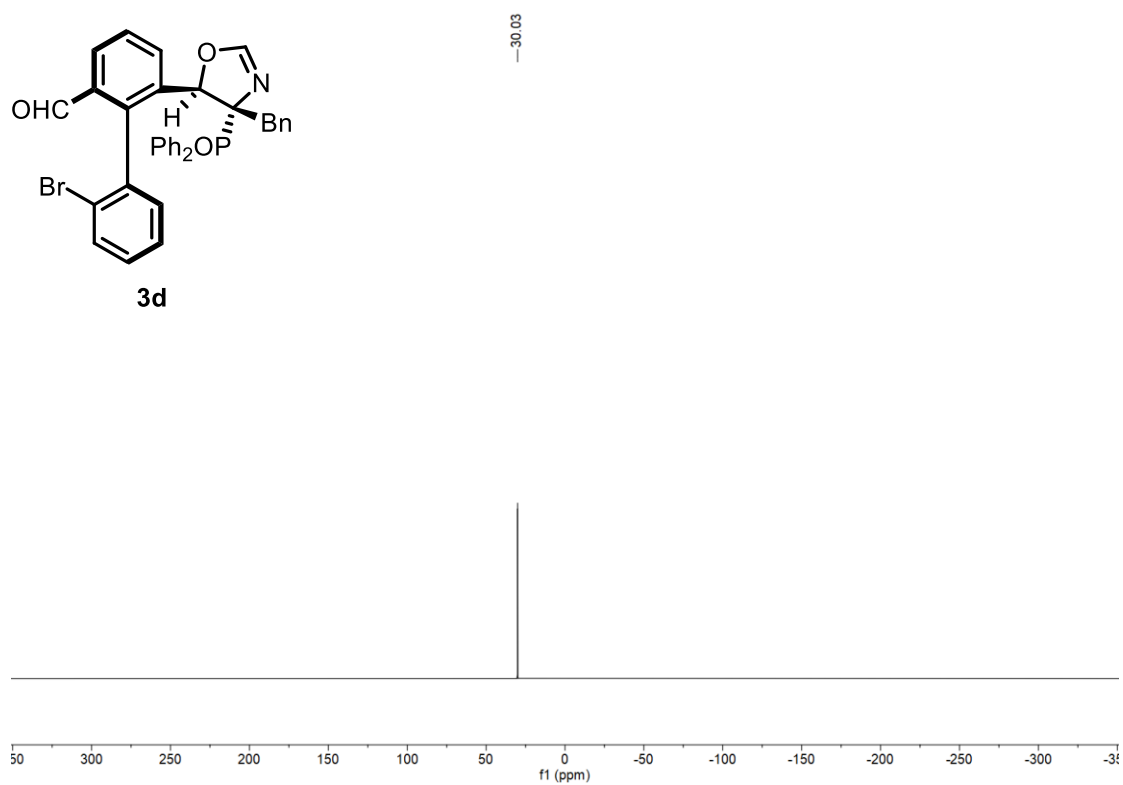

**<sup>1</sup>H NMR (400 MHz, CDCl<sub>3</sub>)**

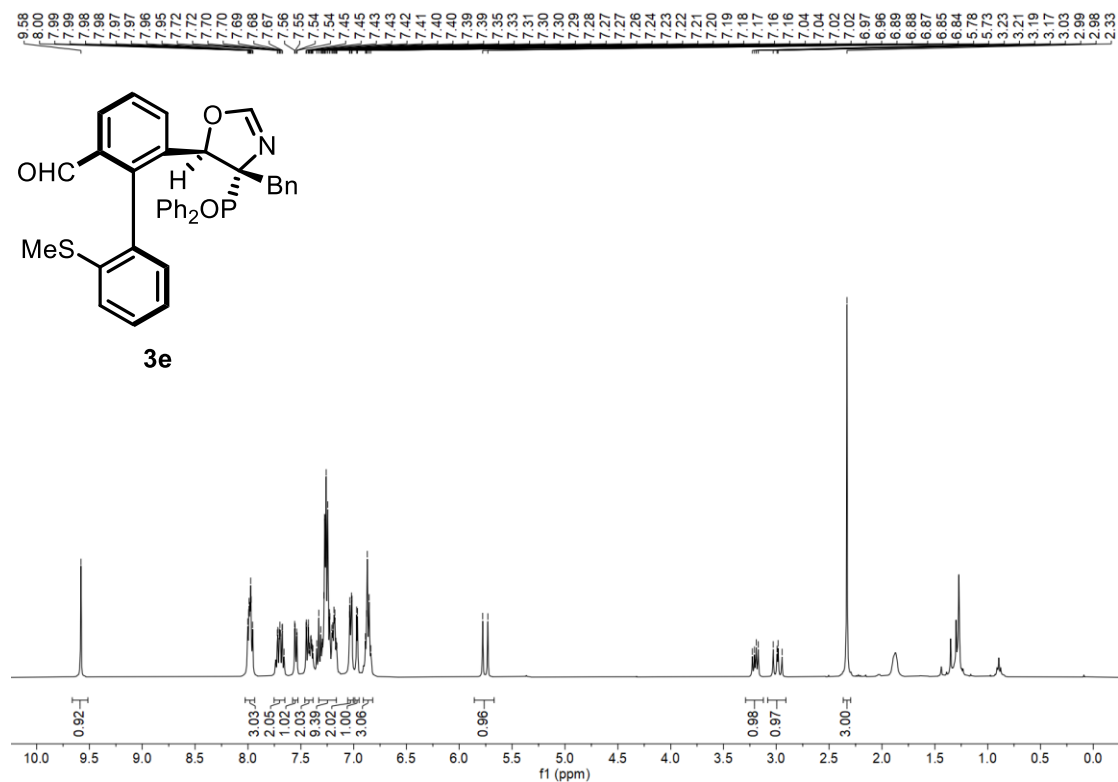

**<sup>13</sup>C NMR (101 MHz, CDCl<sub>3</sub>)**

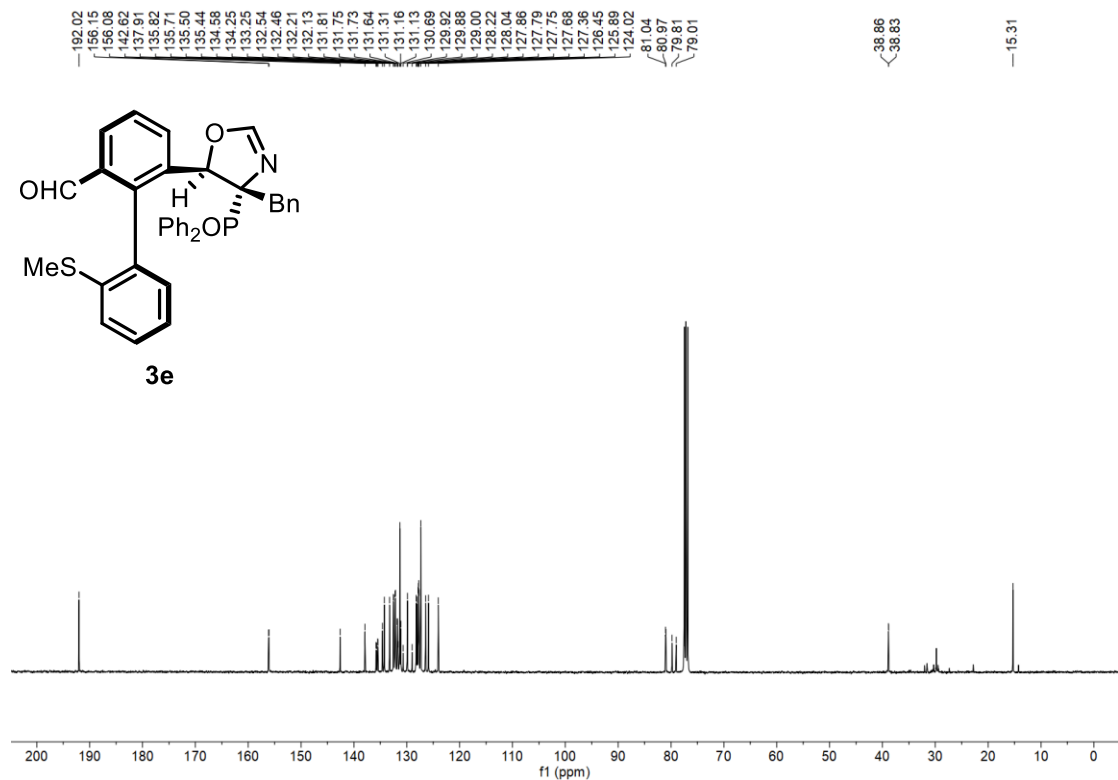

<sup>31</sup>P NMR (162 MHz, CDCl<sub>3</sub>)

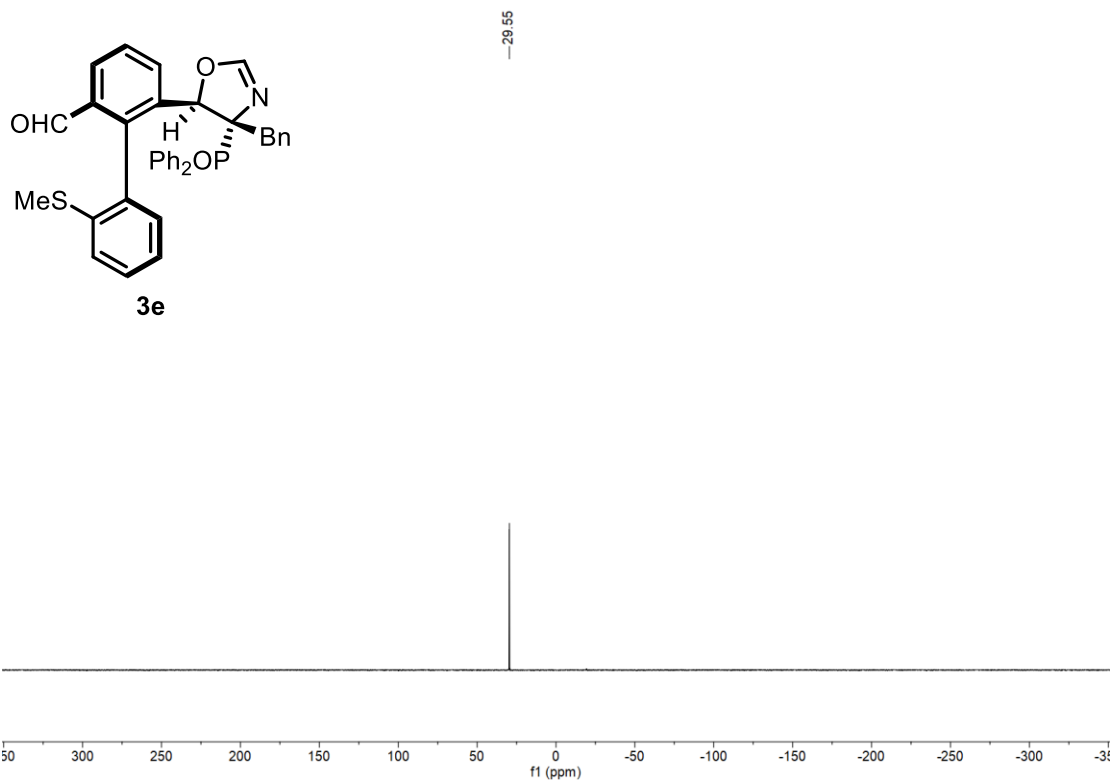

<sup>1</sup>H NMR (400 MHz, DMSO-*d*<sub>6</sub>)

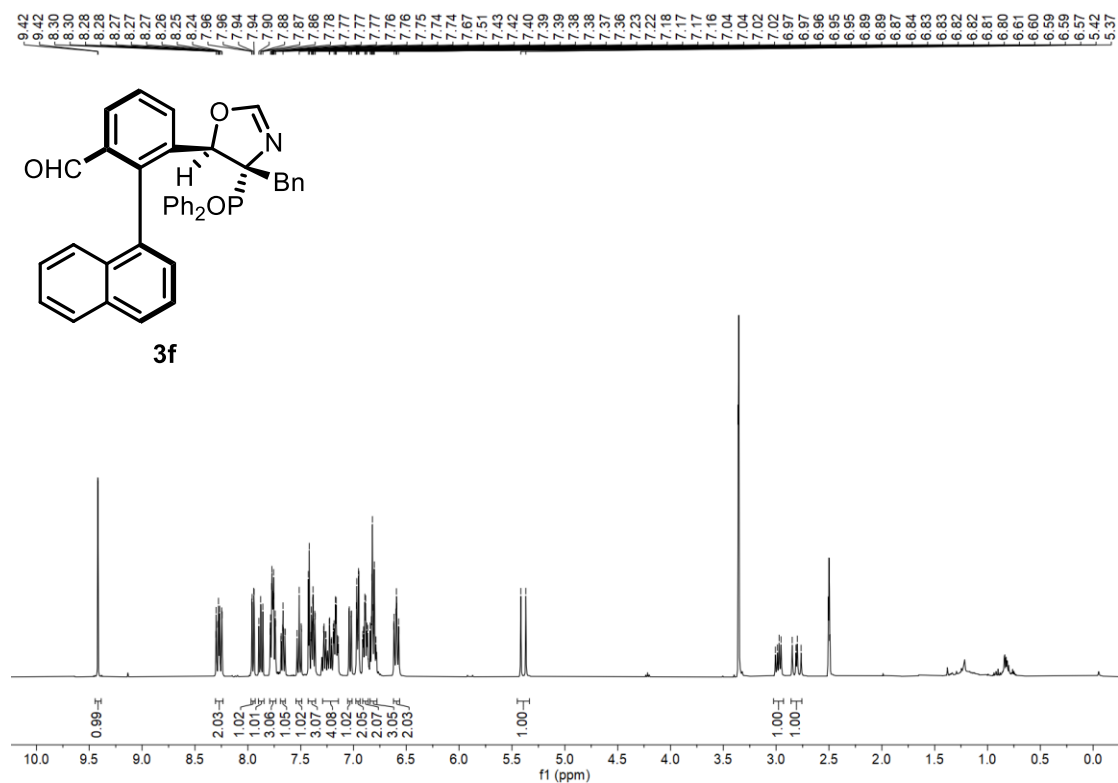



<sup>13</sup>C NMR (101 MHz, DMSO-*d*<sub>6</sub>)

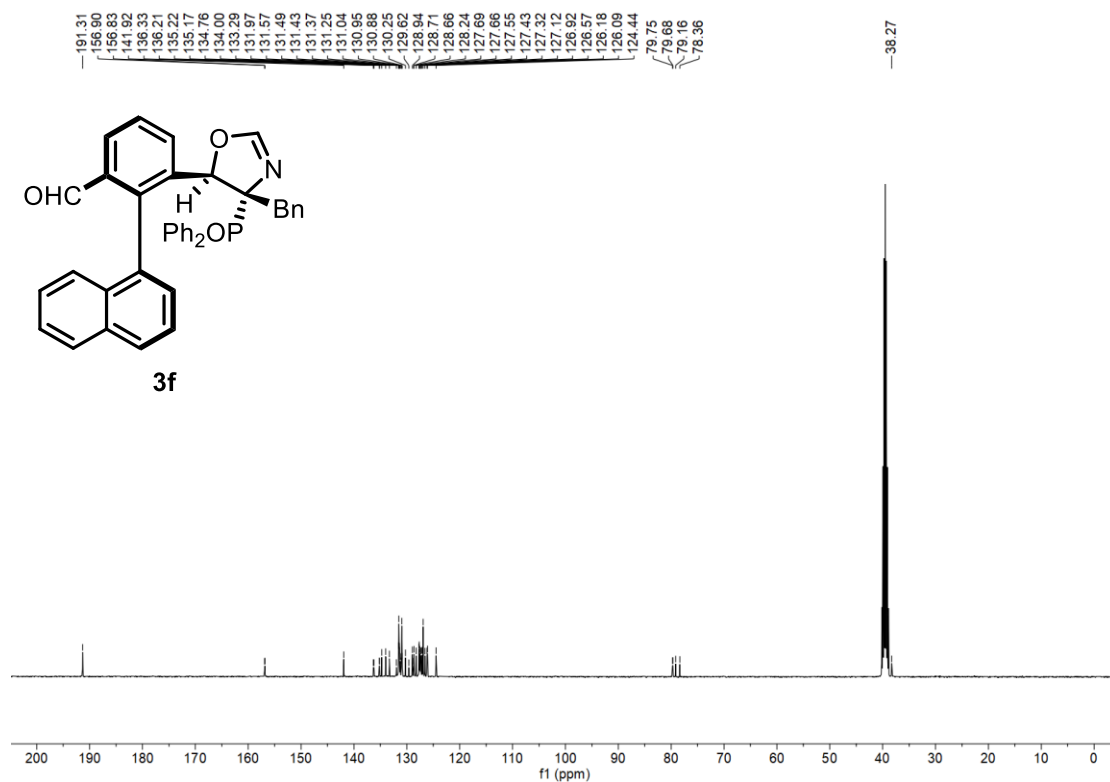

<sup>31</sup>P NMR (162 MHz, DMSO-*d*<sub>6</sub>)

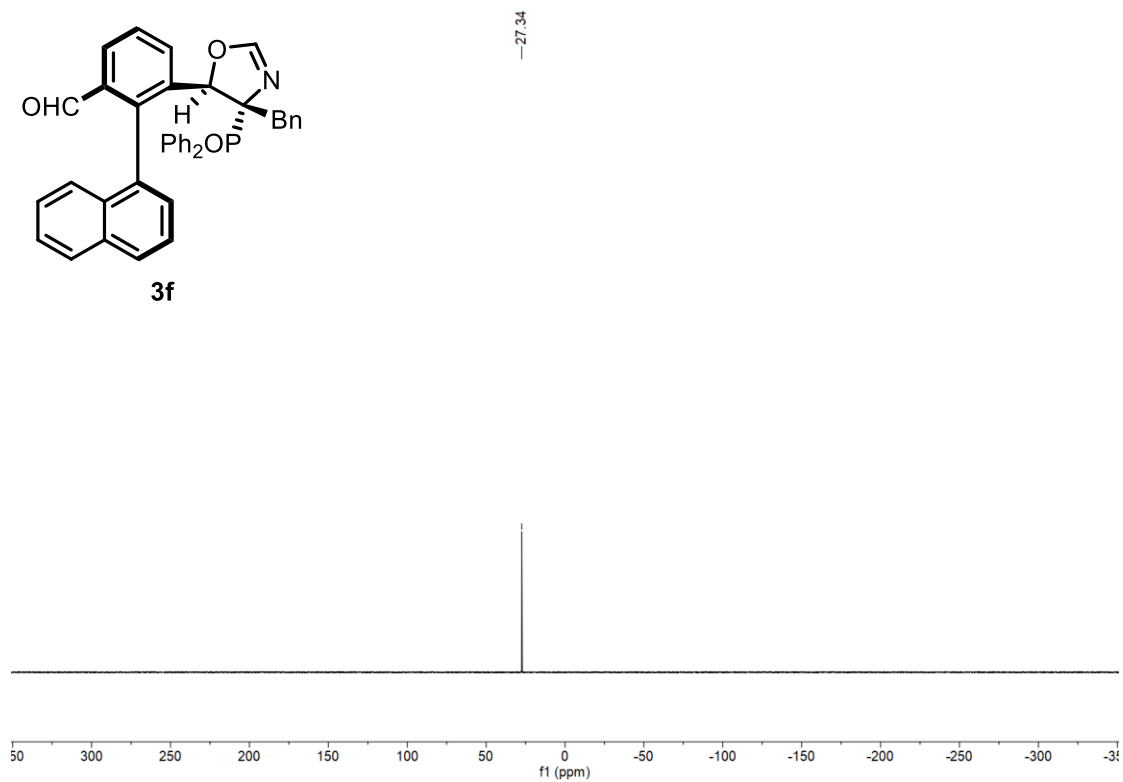

<sup>1</sup>H NMR (400 MHz, CDCl<sub>3</sub>)

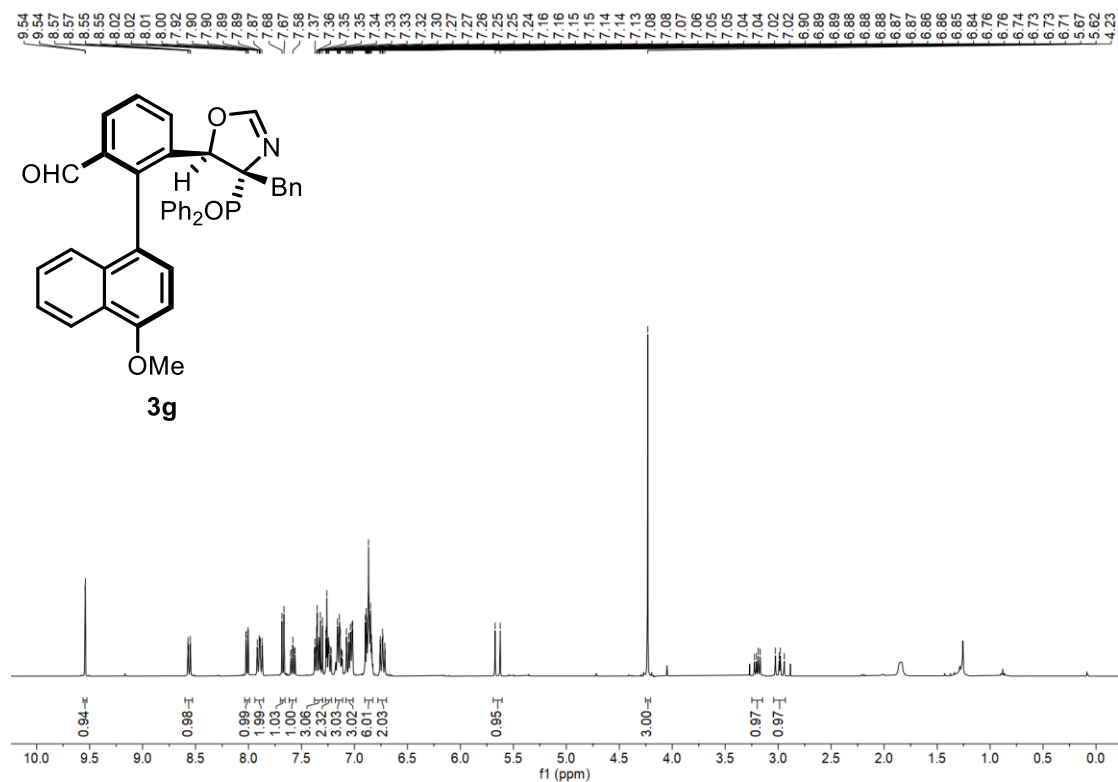

<sup>13</sup>C NMR (101 MHz, CDCl<sub>3</sub>)

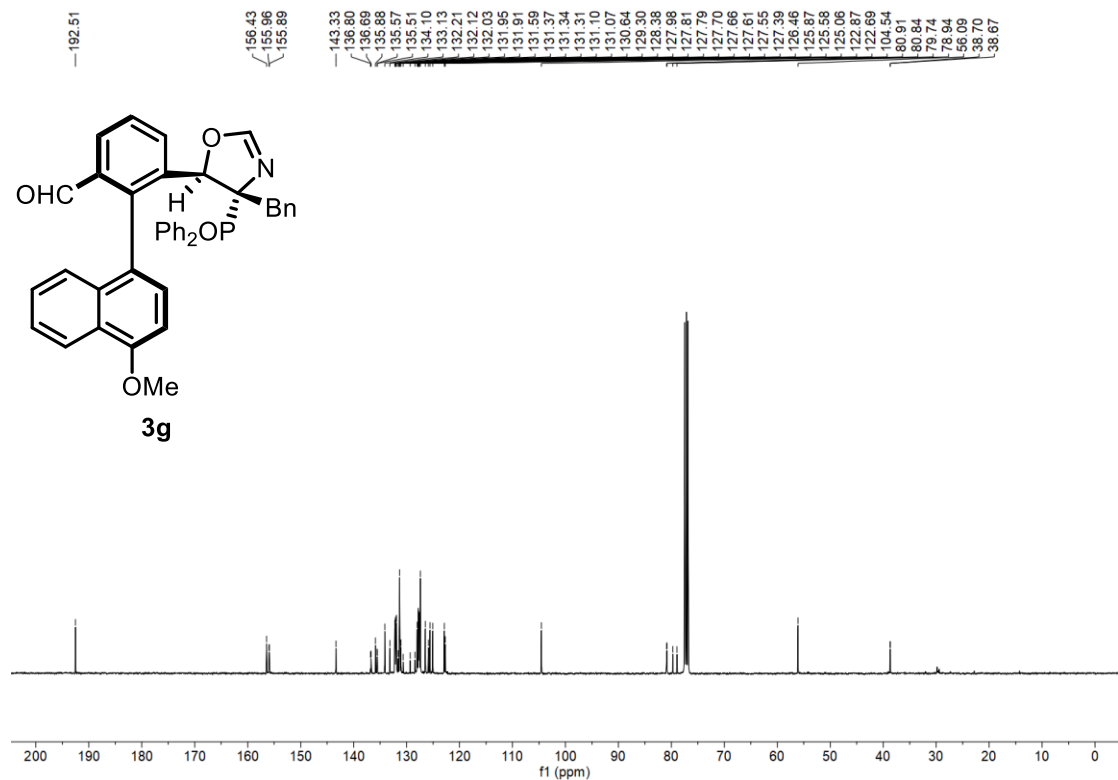

**<sup>31</sup>P NMR (162 MHz, CDCl<sub>3</sub>)**

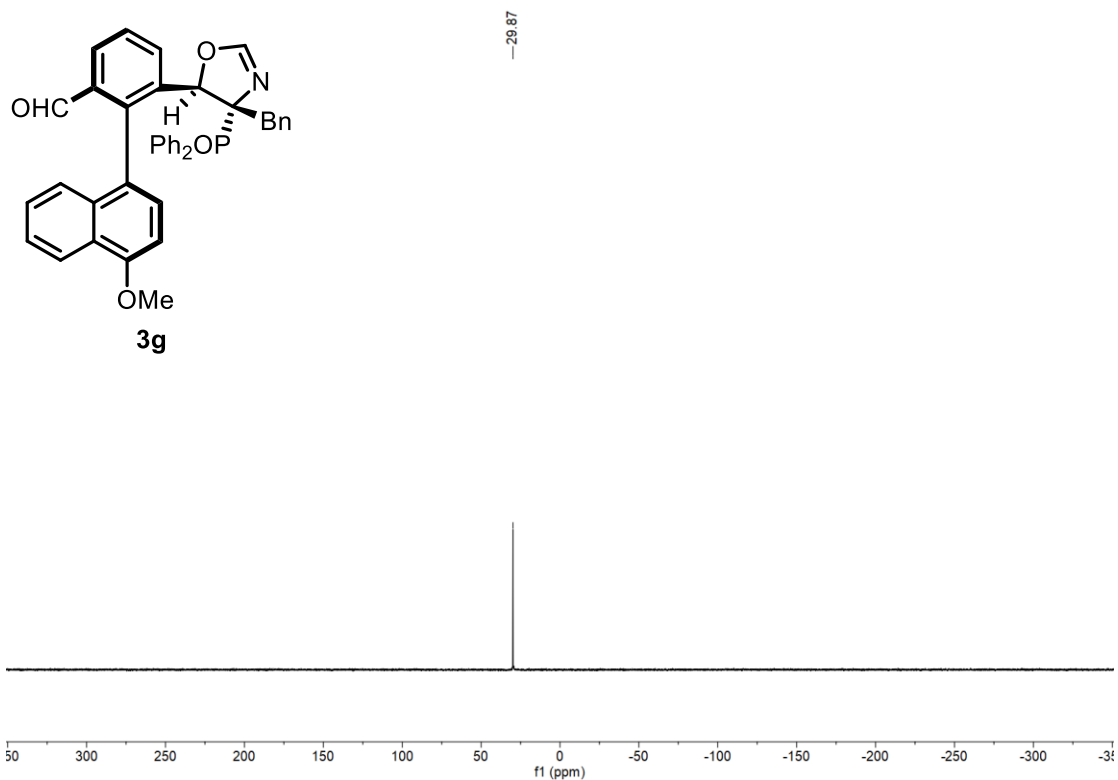

**<sup>1</sup>H NMR (400 MHz, CDCl<sub>3</sub>)**

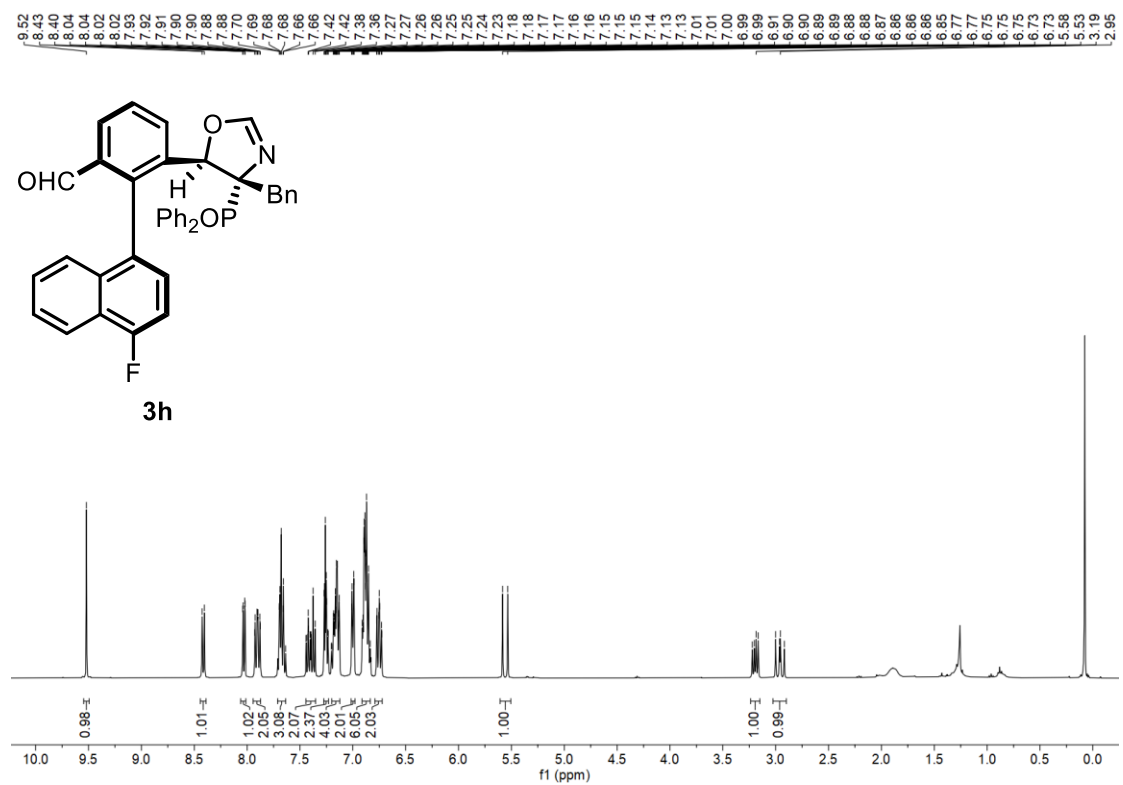

**<sup>13</sup>C NMR (101 MHz, CDCl<sub>3</sub>)**

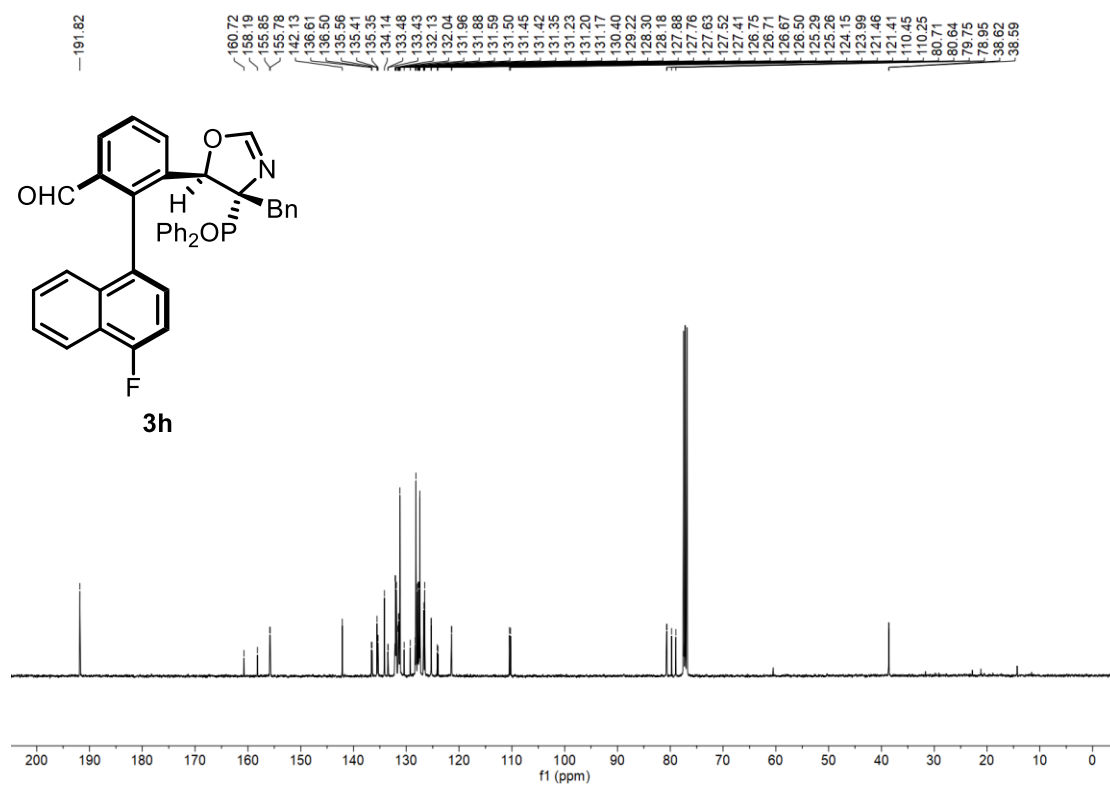

**<sup>19</sup>F NMR (376 MHz, CDCl<sub>3</sub>)**

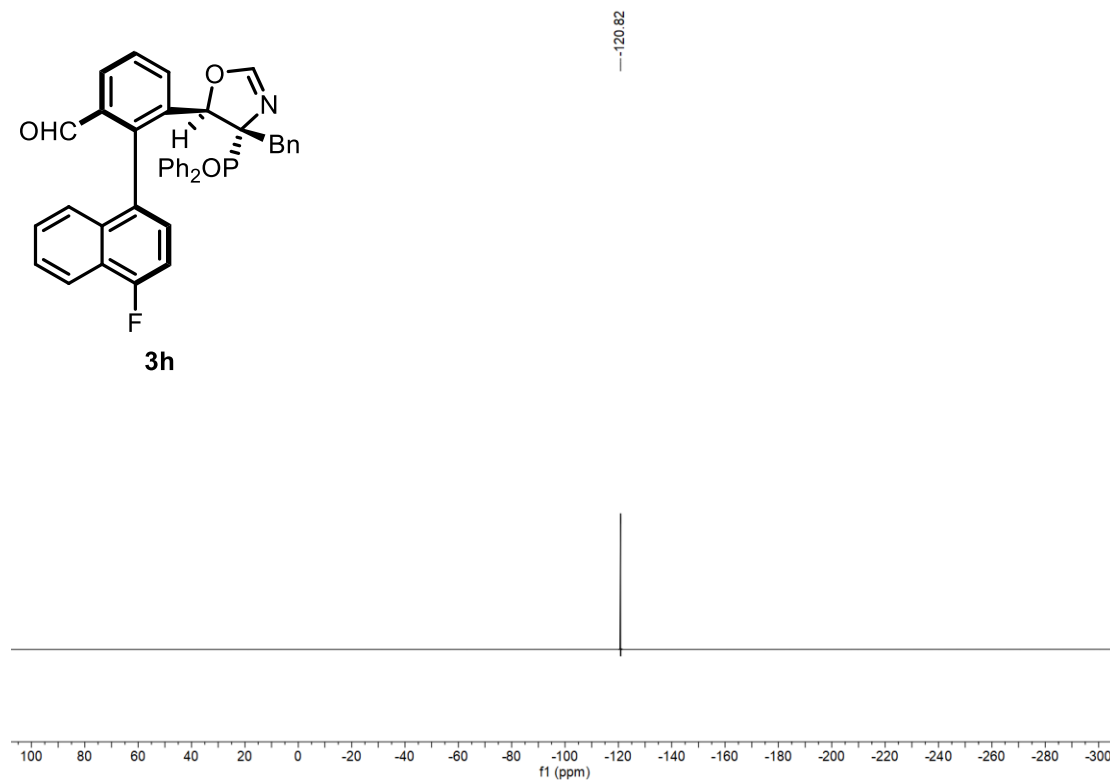

**<sup>31</sup>P NMR (162 MHz, CDCl<sub>3</sub>)**

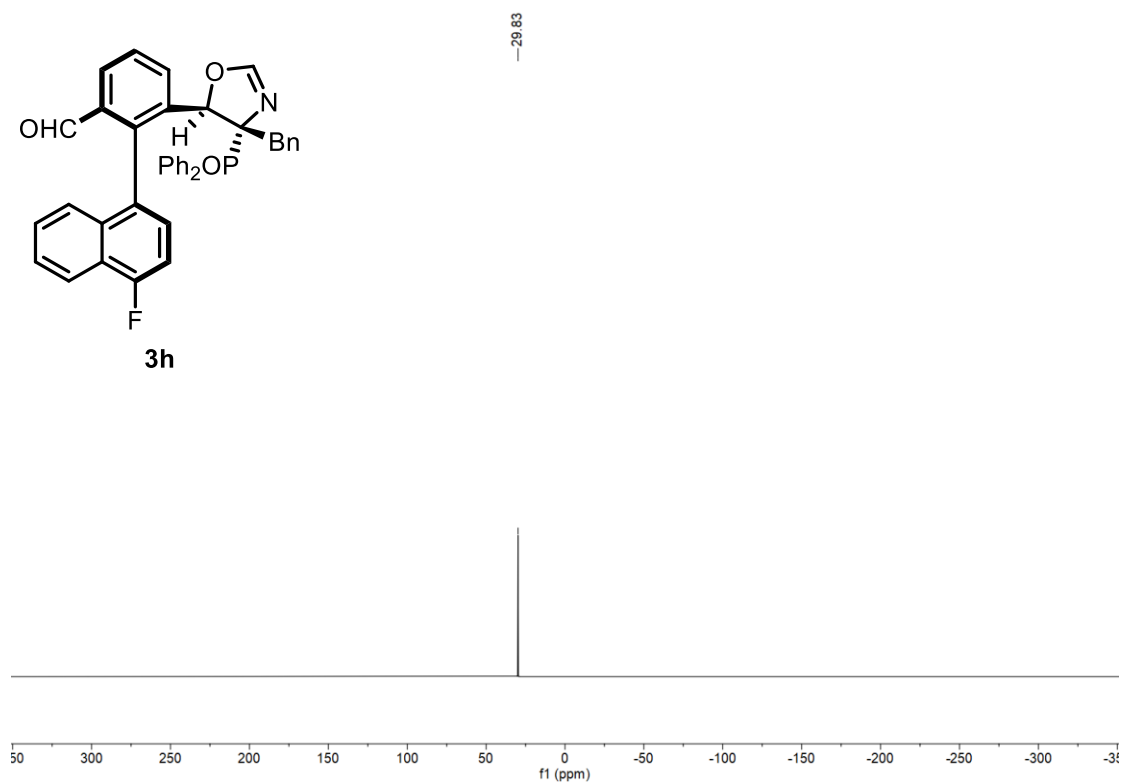

**<sup>1</sup>H NMR (400 MHz, CDCl<sub>3</sub>)**

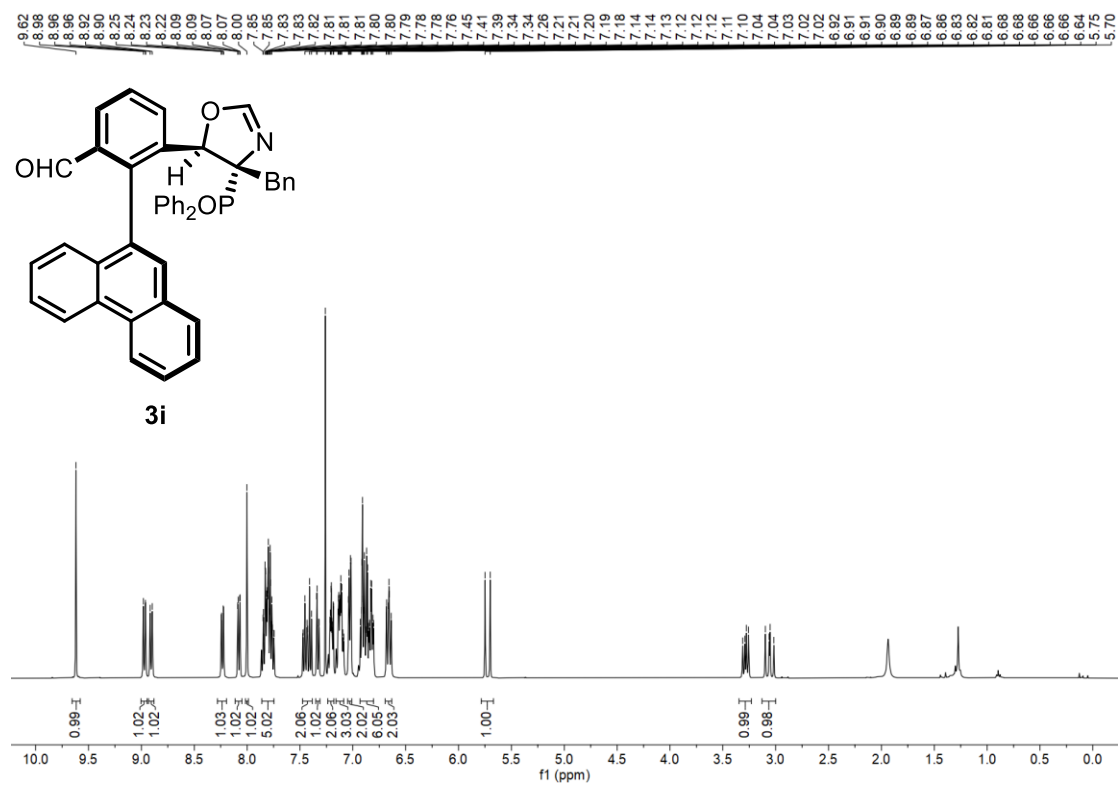

<sup>13</sup>C NMR (101 MHz, CDCl<sub>3</sub>)

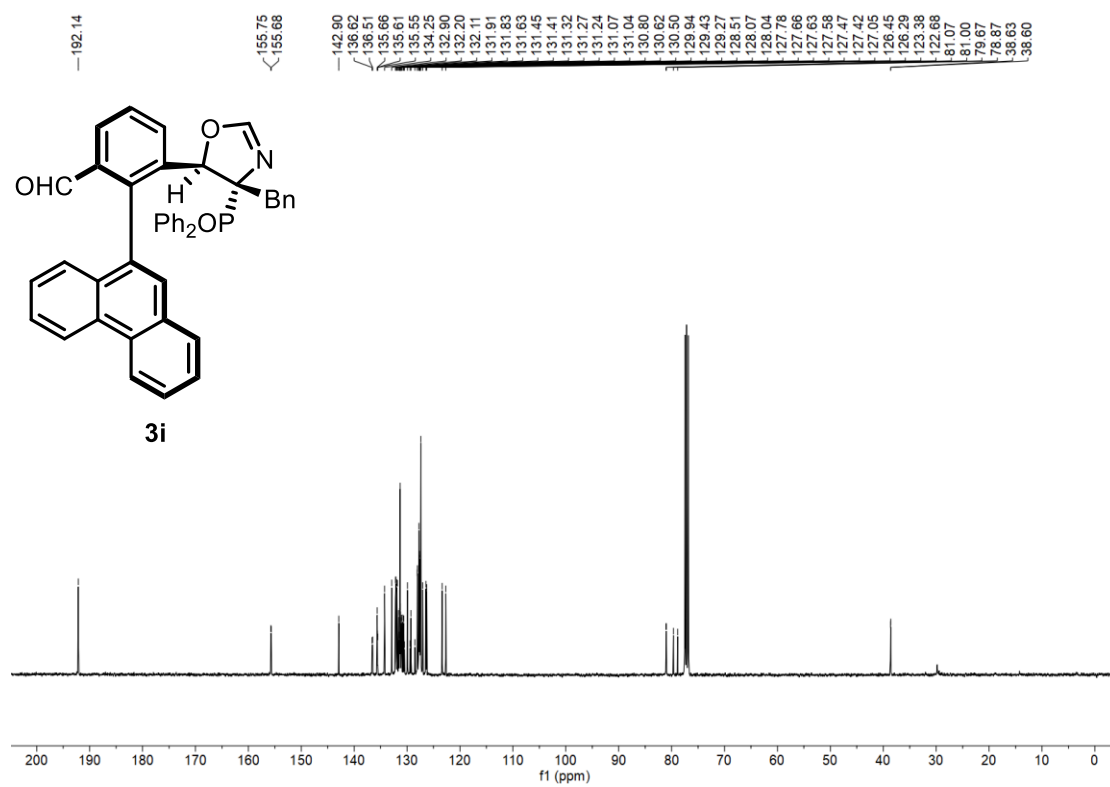

<sup>31</sup>P NMR (162 MHz, CDCl<sub>3</sub>)

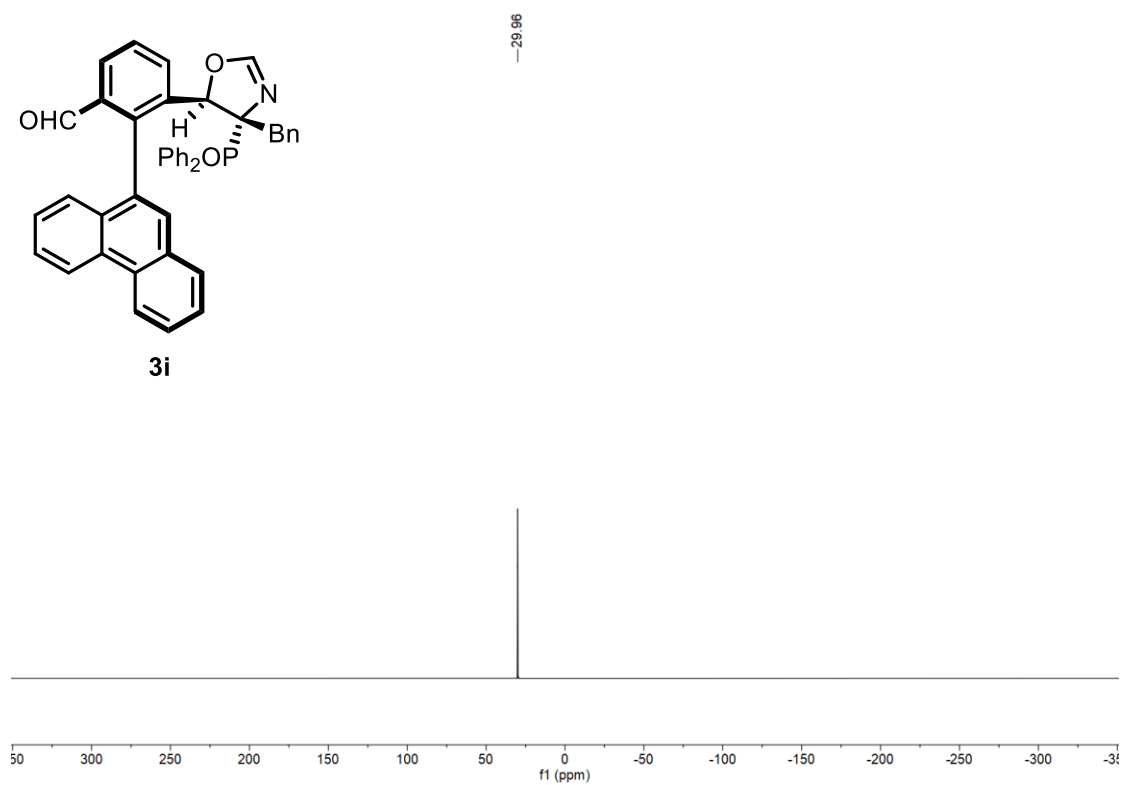

<sup>1</sup>H NMR (400 MHz, CDCl<sub>3</sub>)

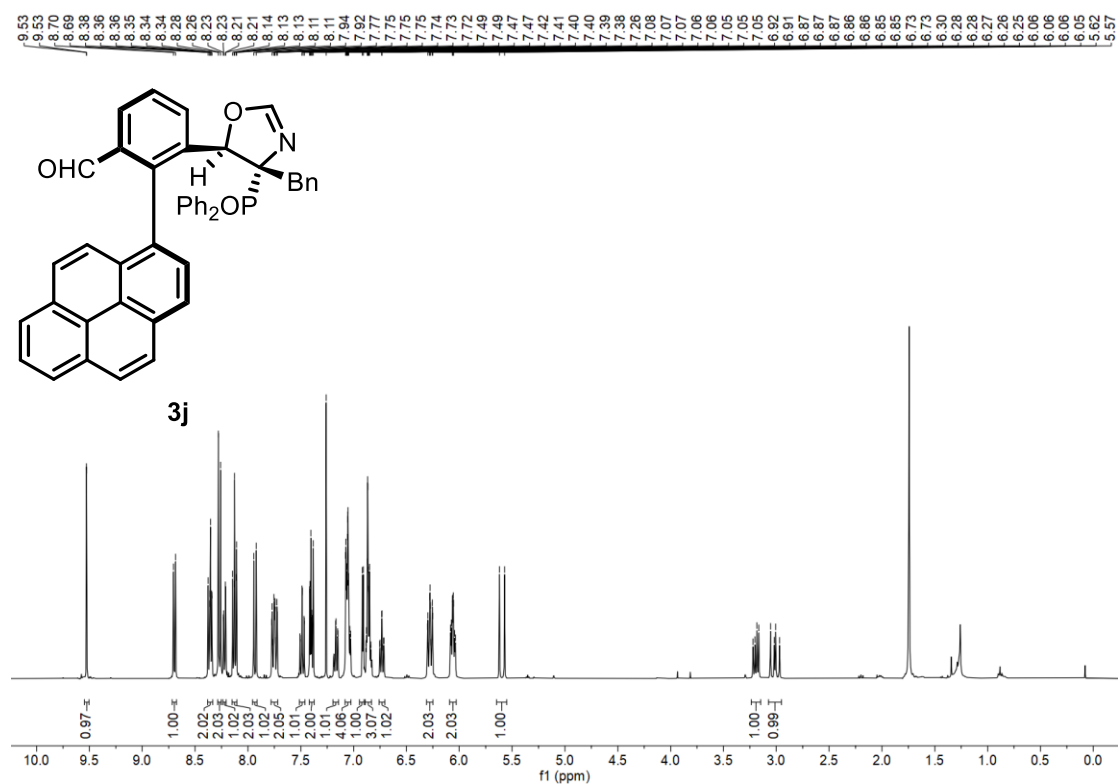

<sup>13</sup>C NMR (101 MHz, CDCl<sub>3</sub>)

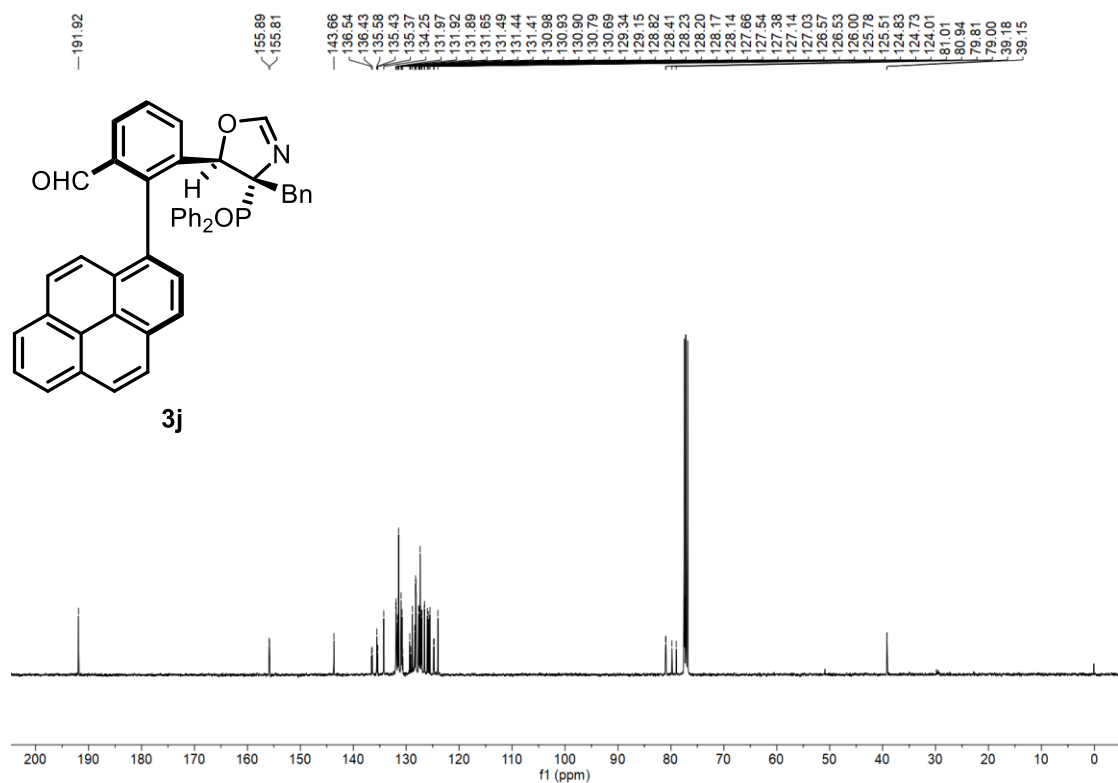

**<sup>31</sup>P NMR (162 MHz, CDCl<sub>3</sub>)**

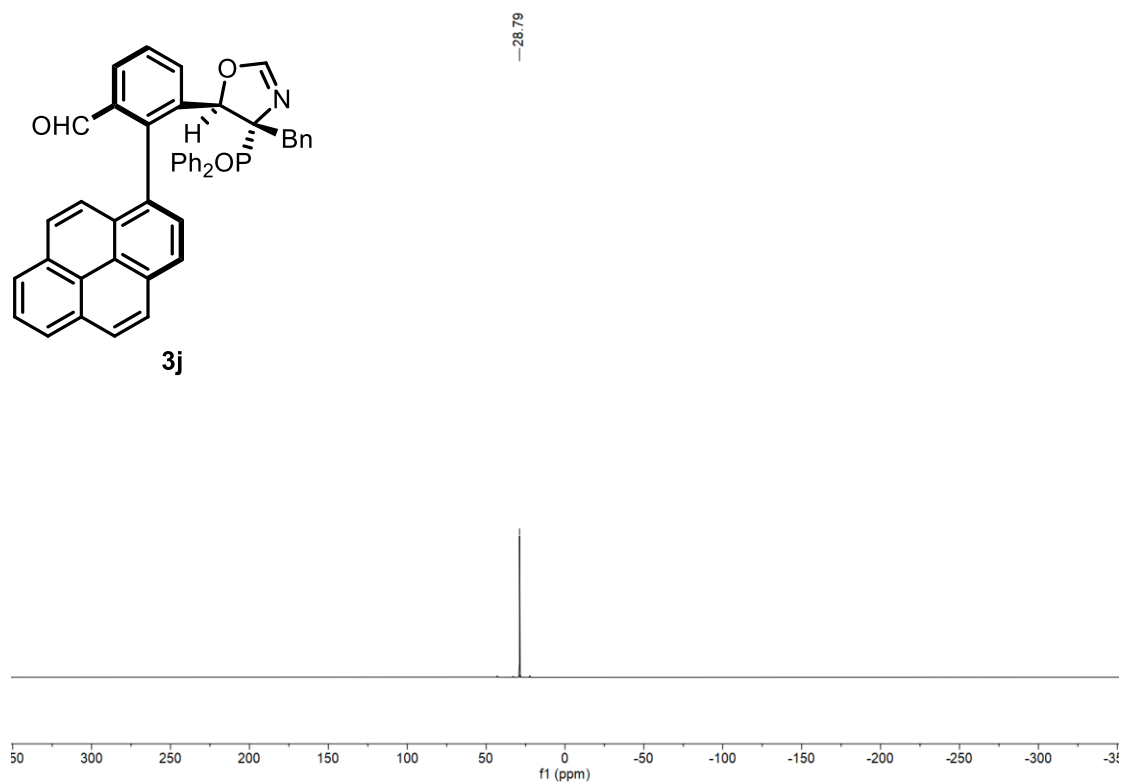

**<sup>1</sup>H NMR (400 MHz, CDCl<sub>3</sub>)**

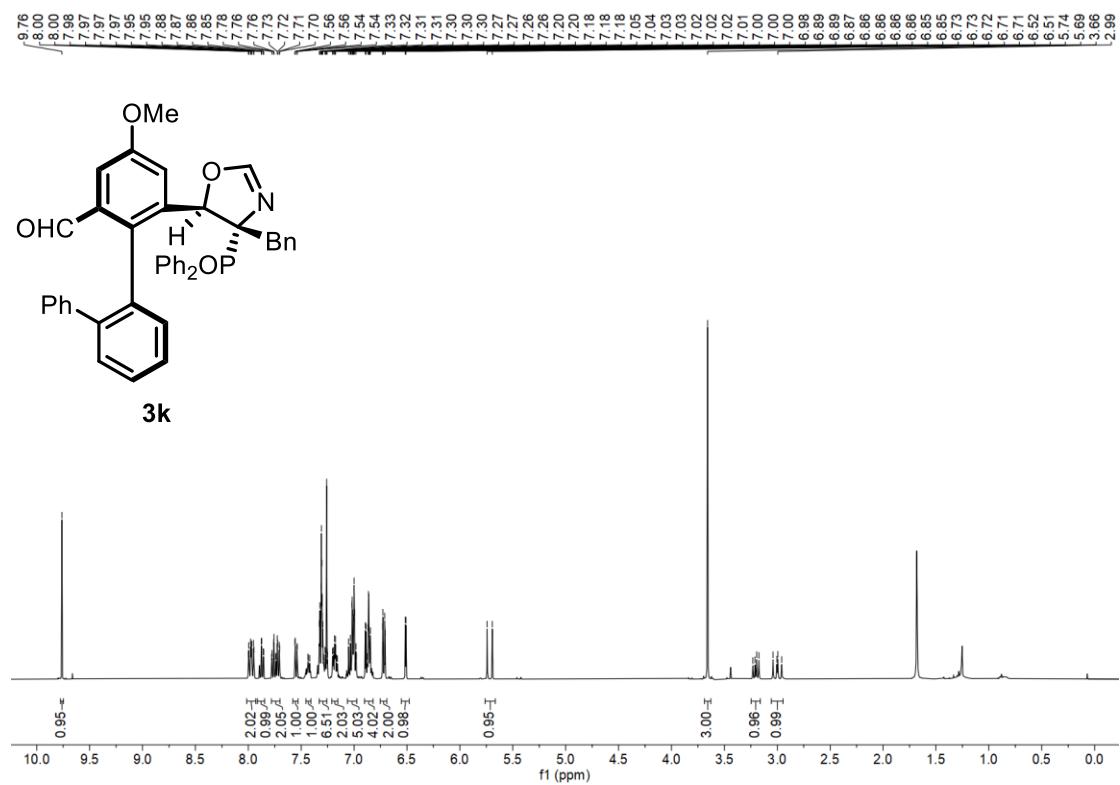



<sup>13</sup>C NMR (101 MHz, CDCl<sub>3</sub>)

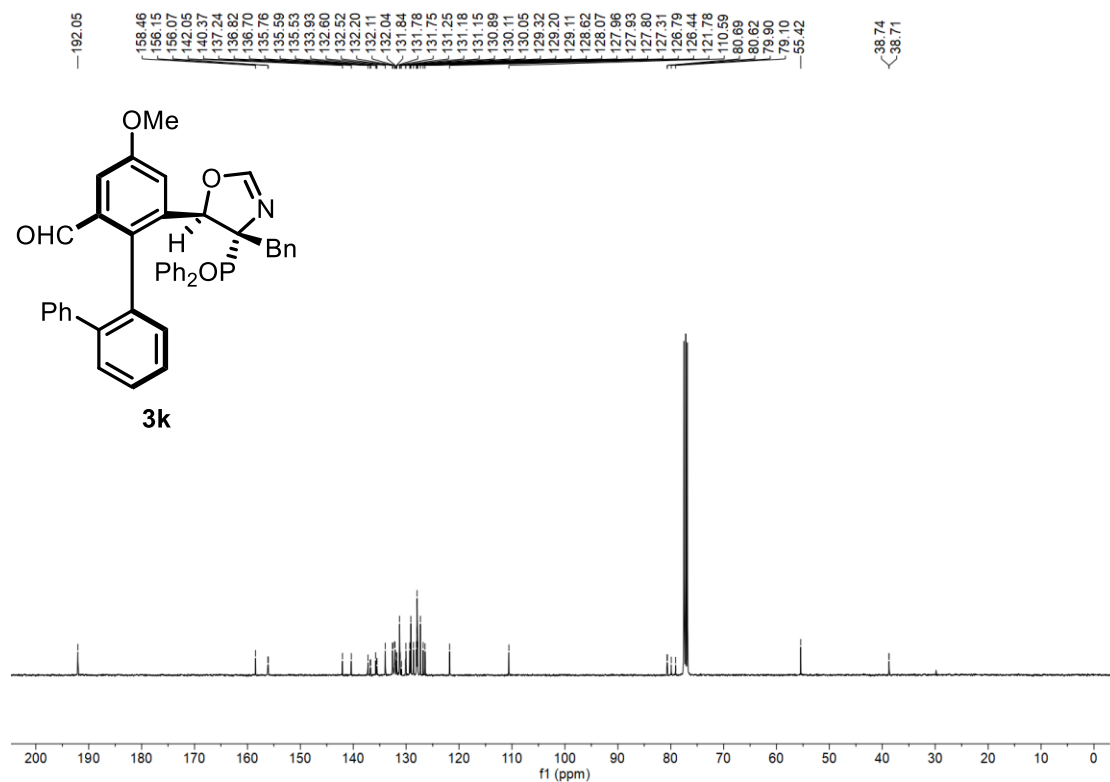

<sup>31</sup>P NMR (162 MHz, CDCl<sub>3</sub>)

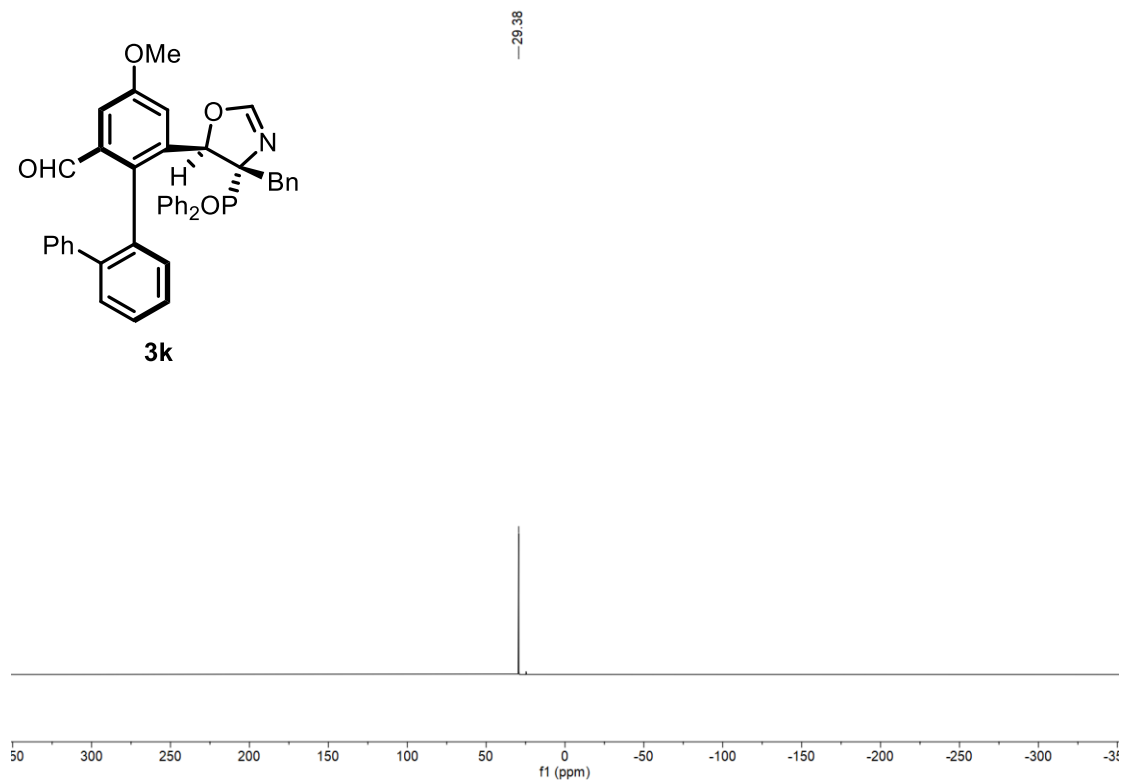

<sup>1</sup>H NMR (400 MHz, CDCl<sub>3</sub>)

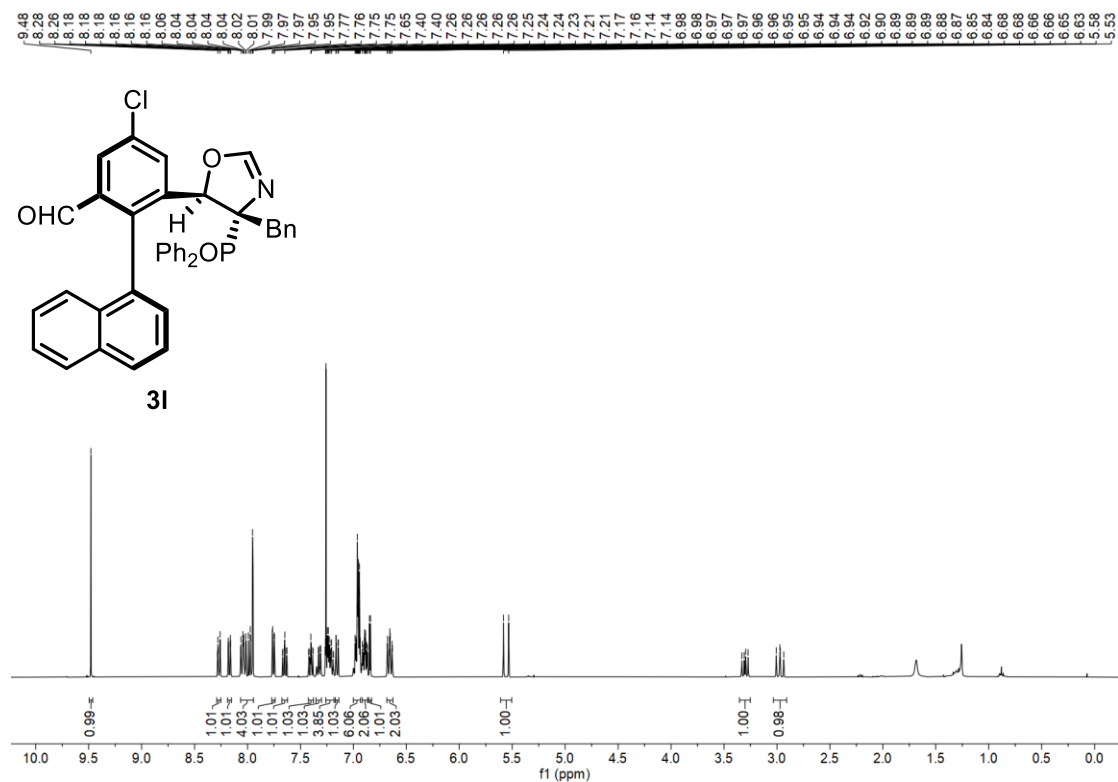

<sup>13</sup>C NMR (101 MHz, CDCl<sub>3</sub>)

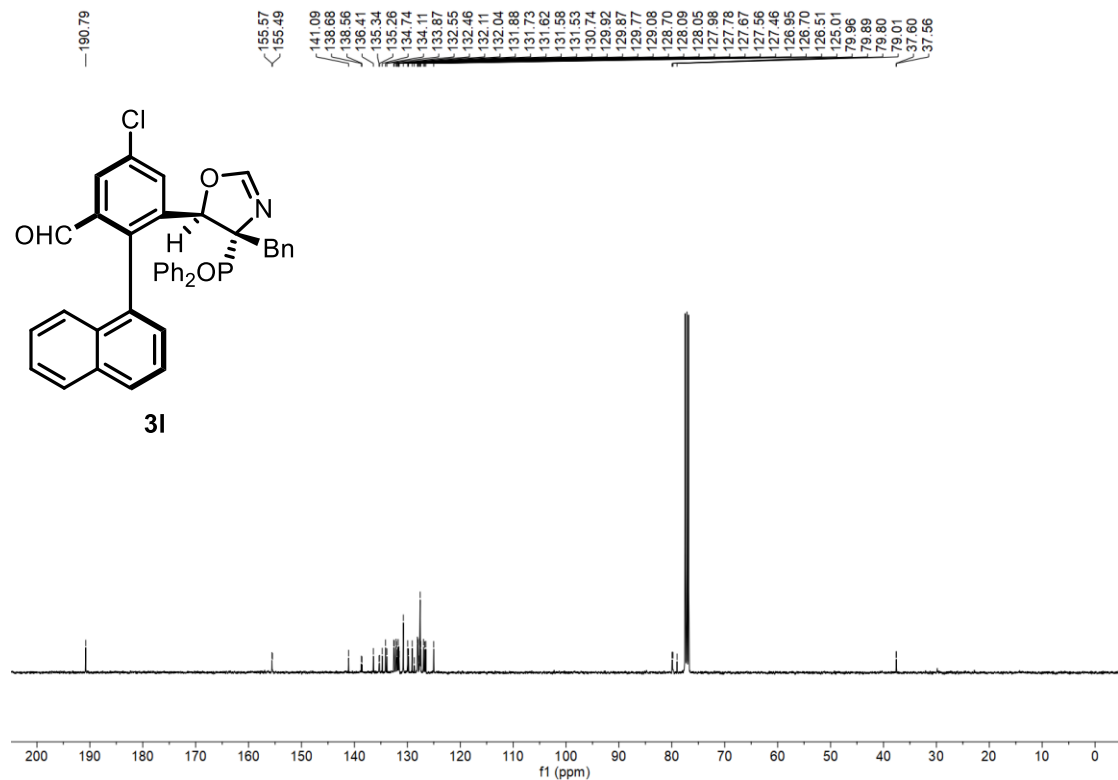

**<sup>31</sup>P NMR (162 MHz, CDCl<sub>3</sub>)**

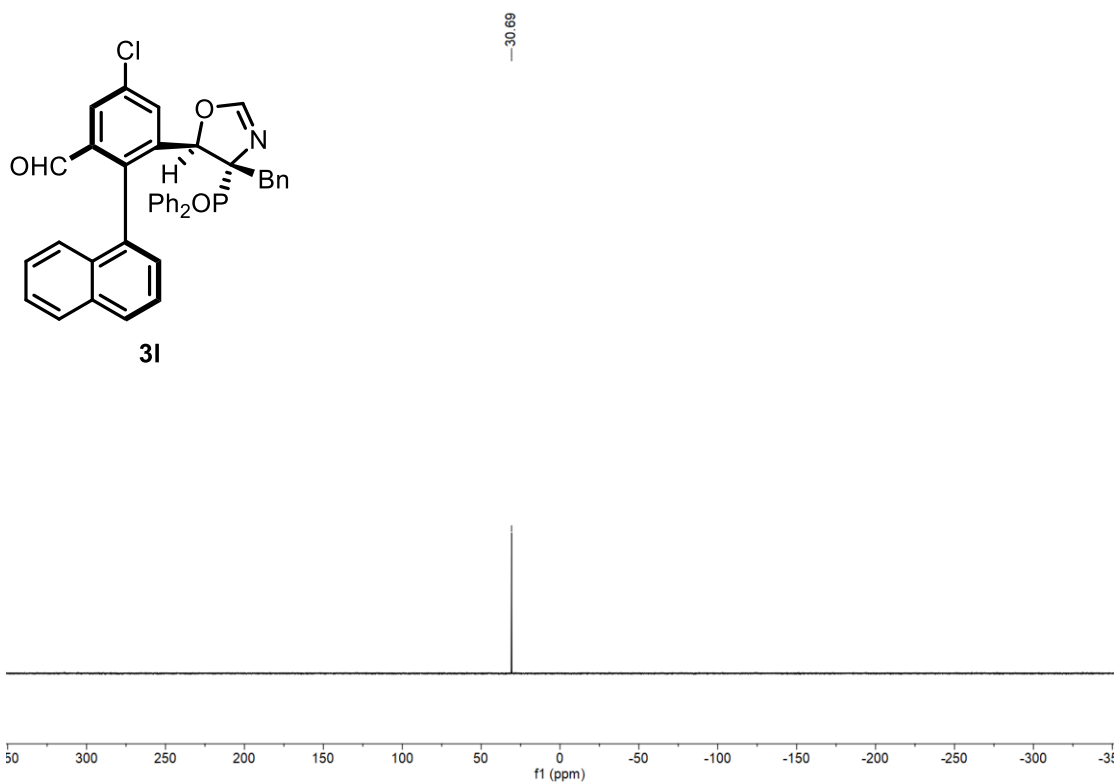

**<sup>1</sup>H NMR (400 MHz, CDCl<sub>3</sub>)**

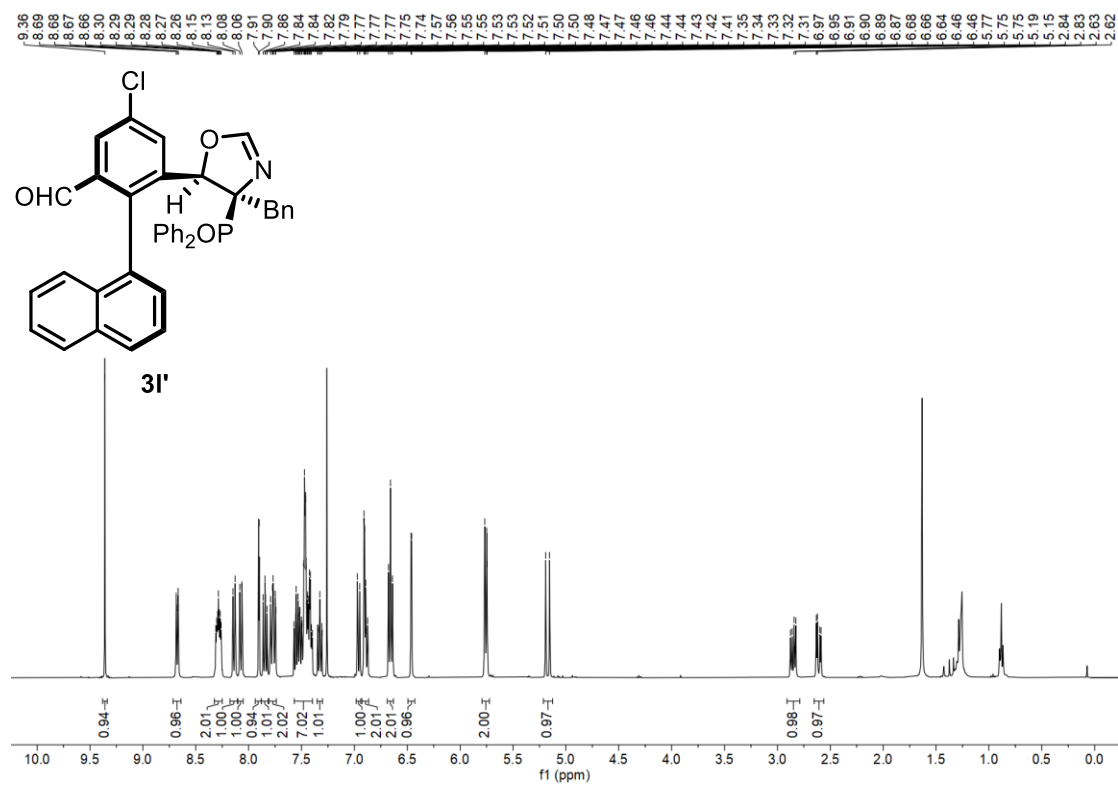

$^{13}\text{C}$  NMR (101 MHz,  $\text{CDCl}_3$ )

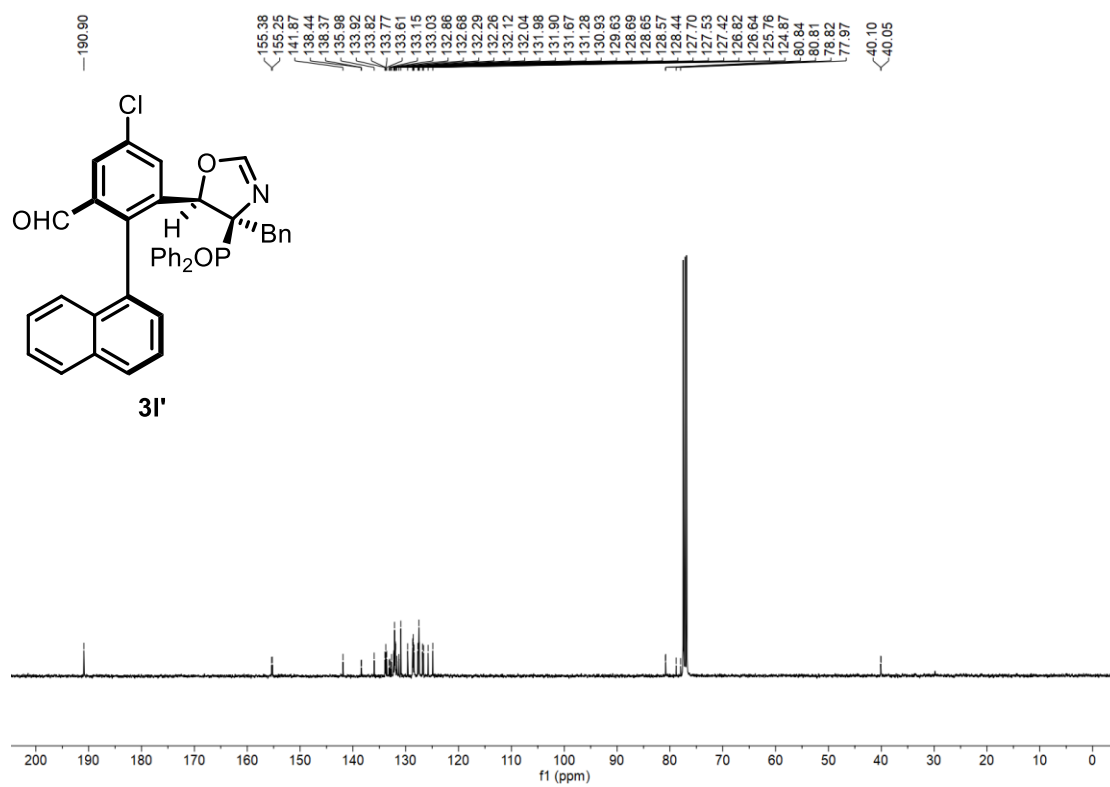

$^{31}\text{P}$  NMR (162 MHz,  $\text{CDCl}_3$ )

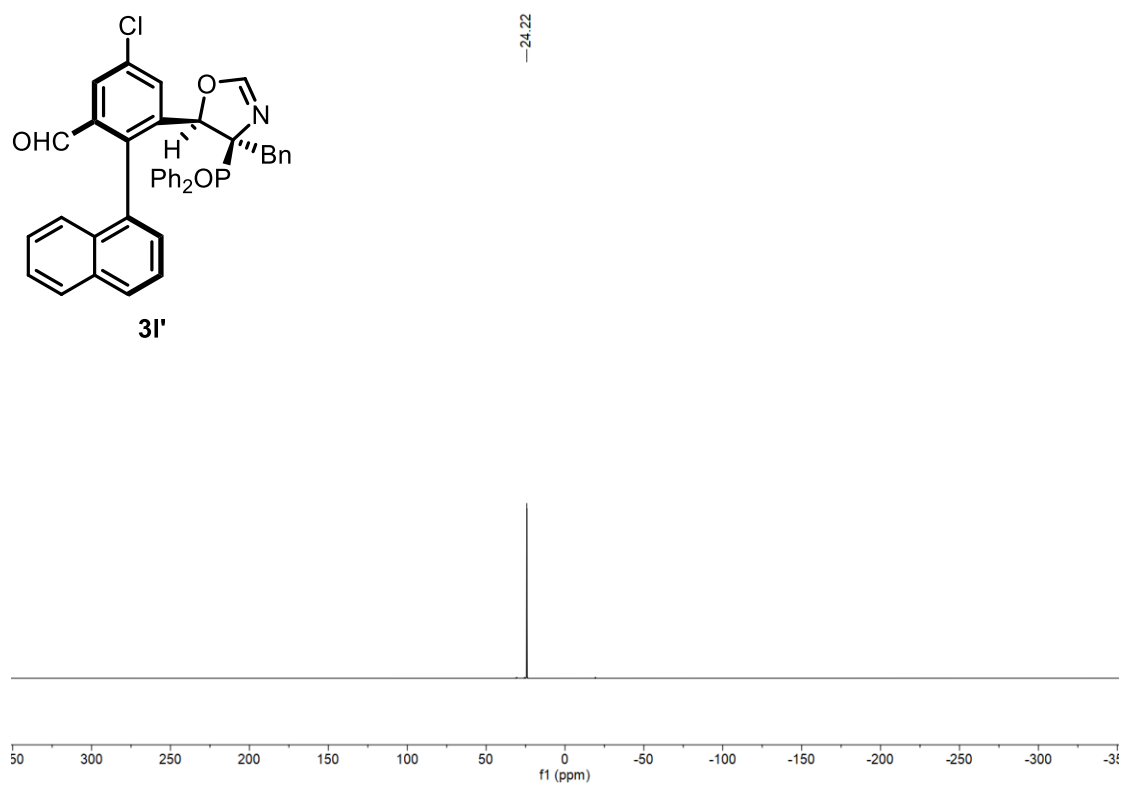

### $^1\text{H}$ NMR (400 MHz, $\text{DMSO-}d_6$ )

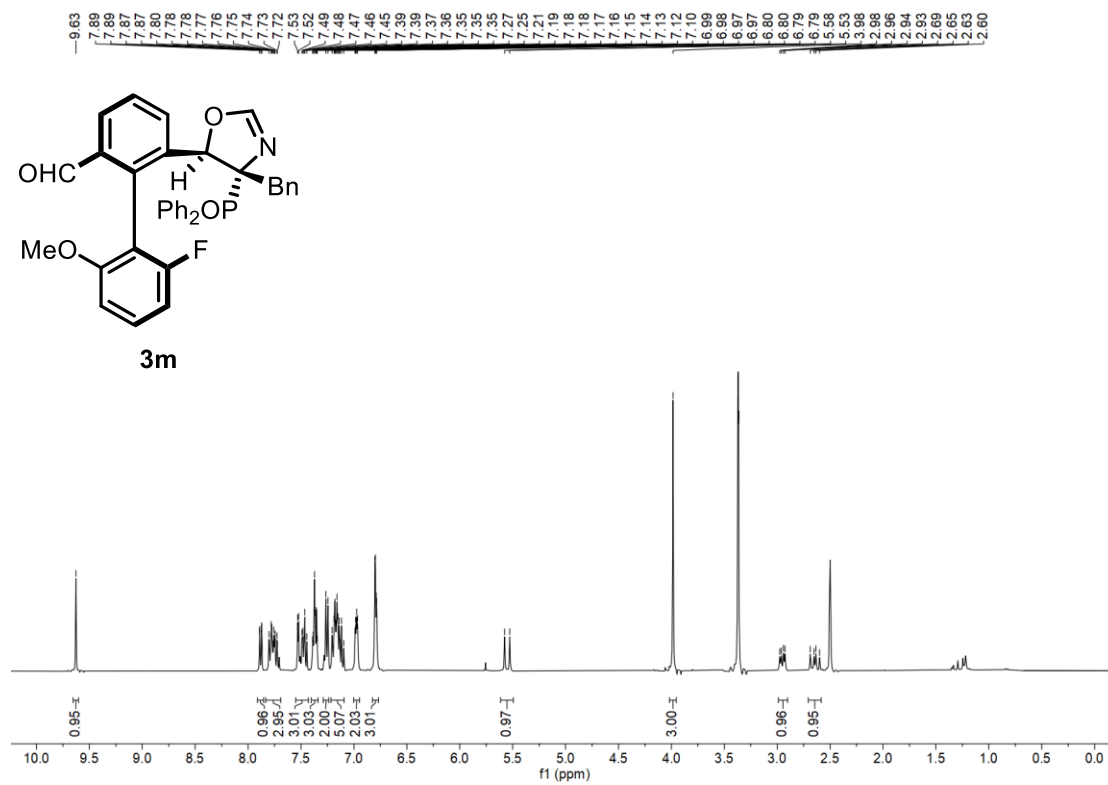

### $^{13}\text{C}$ NMR (101 MHz, $\text{DMSO-}d_6$ )

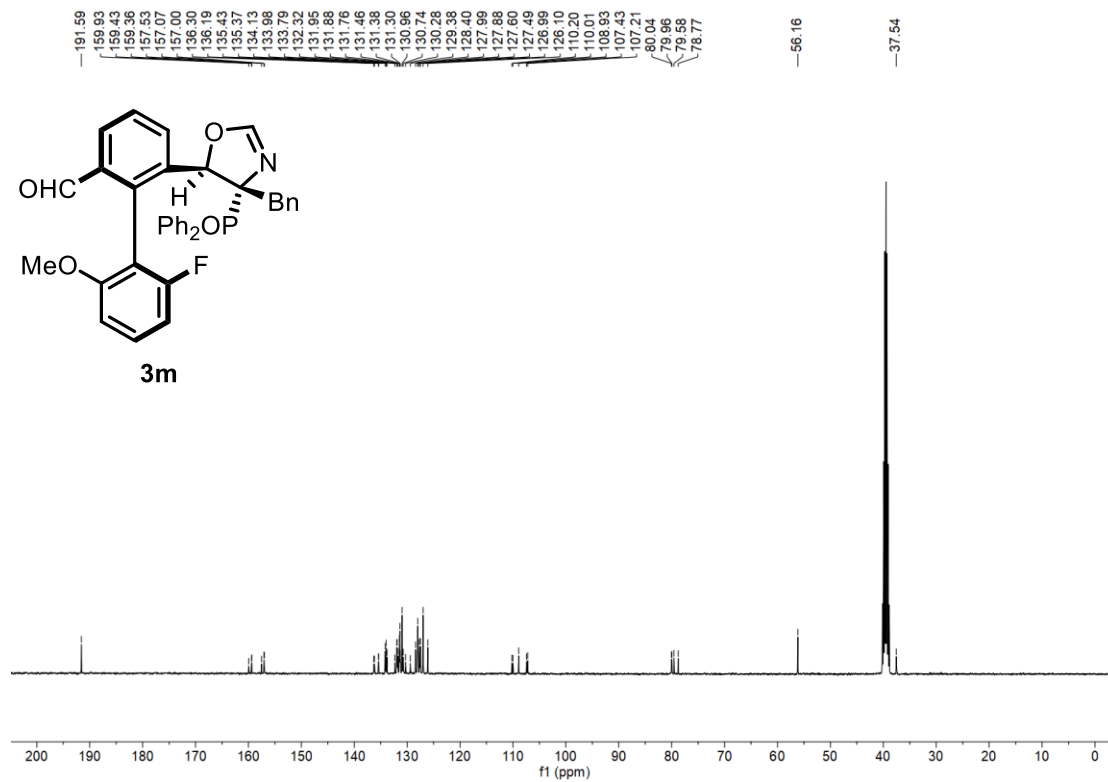

**<sup>19</sup>F NMR (376 MHz, DMSO-*d*<sub>6</sub>)**

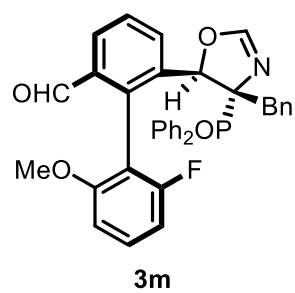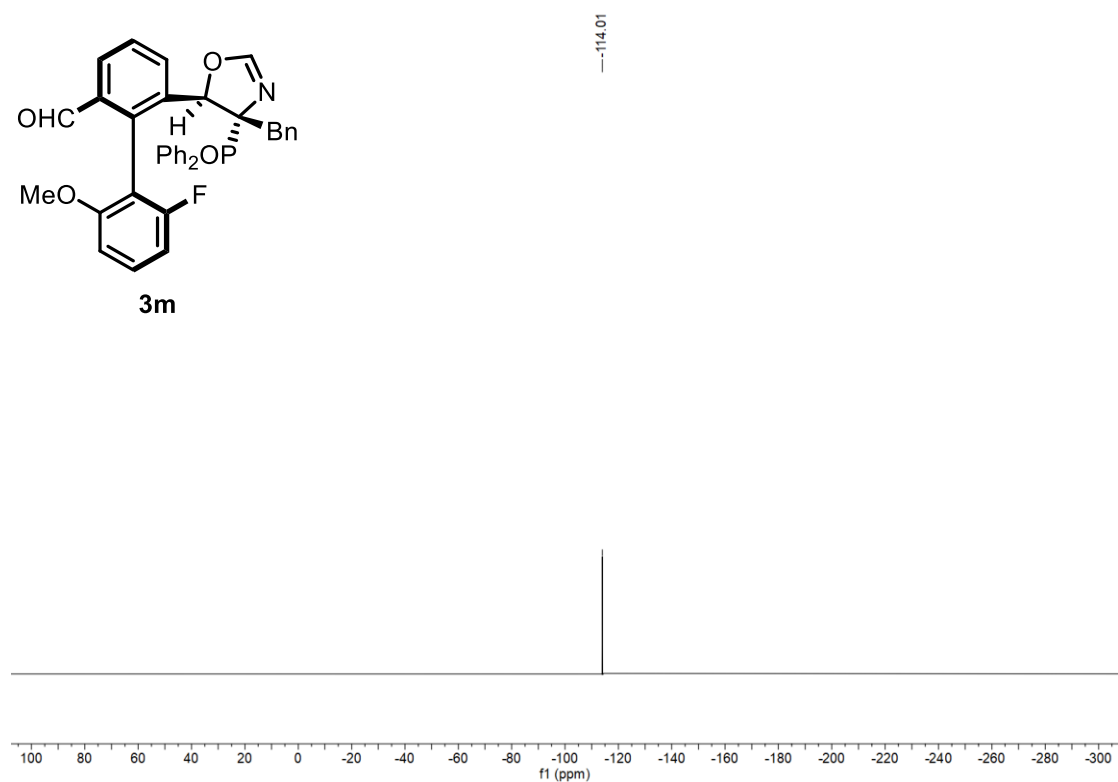

**<sup>31</sup>P NMR (162 MHz, DMSO-*d*<sub>6</sub>)**

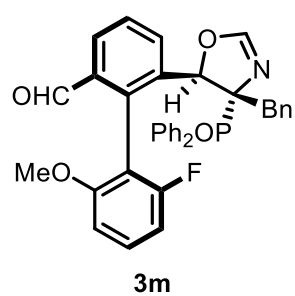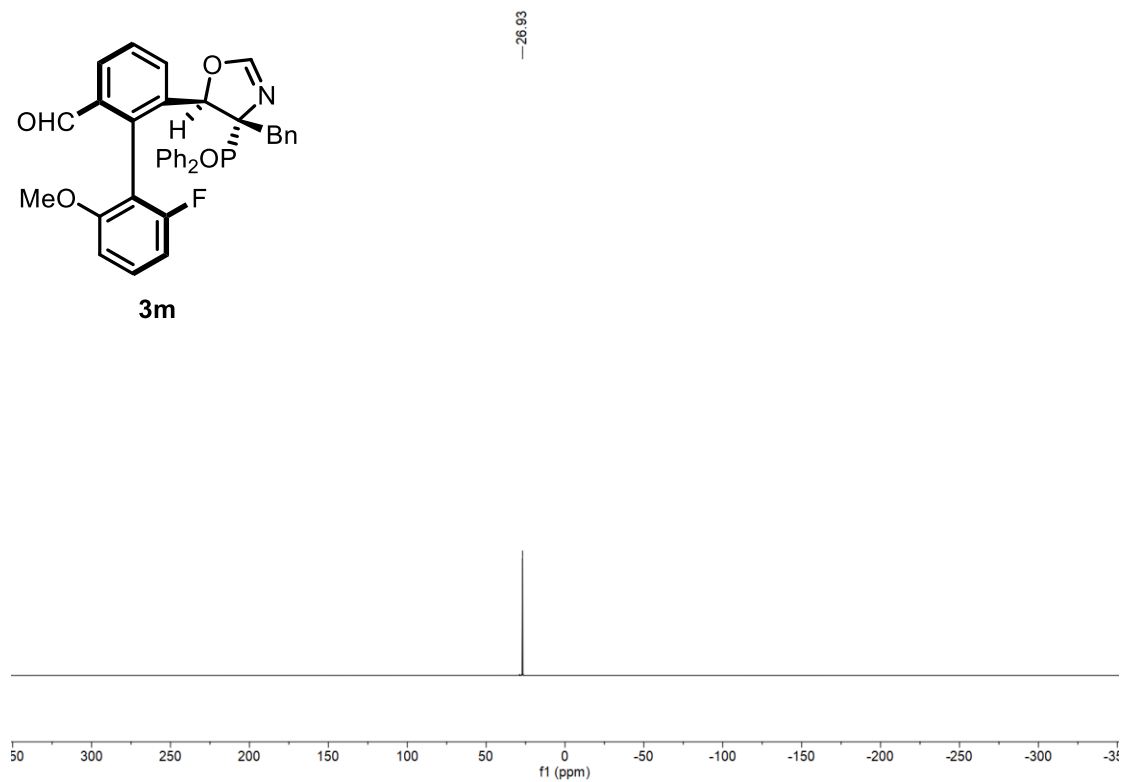

<sup>1</sup>H NMR (400 MHz, CDCl<sub>3</sub>)

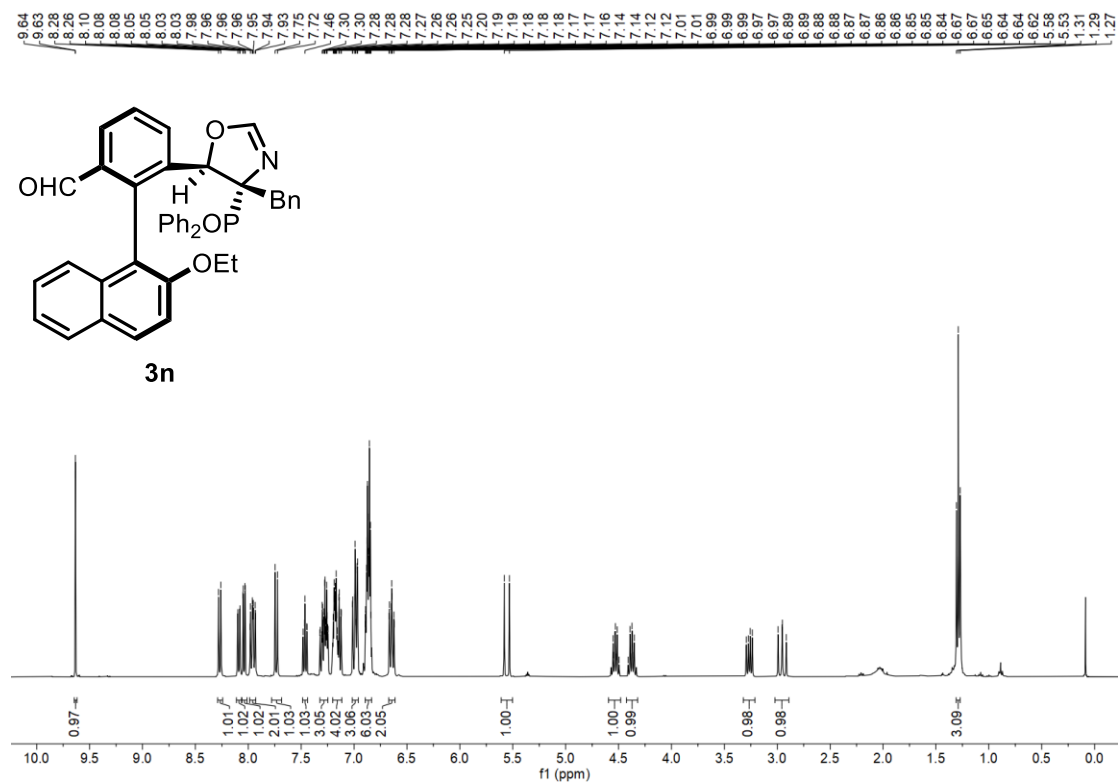

<sup>13</sup>C NMR (101 MHz, CDCl<sub>3</sub>)

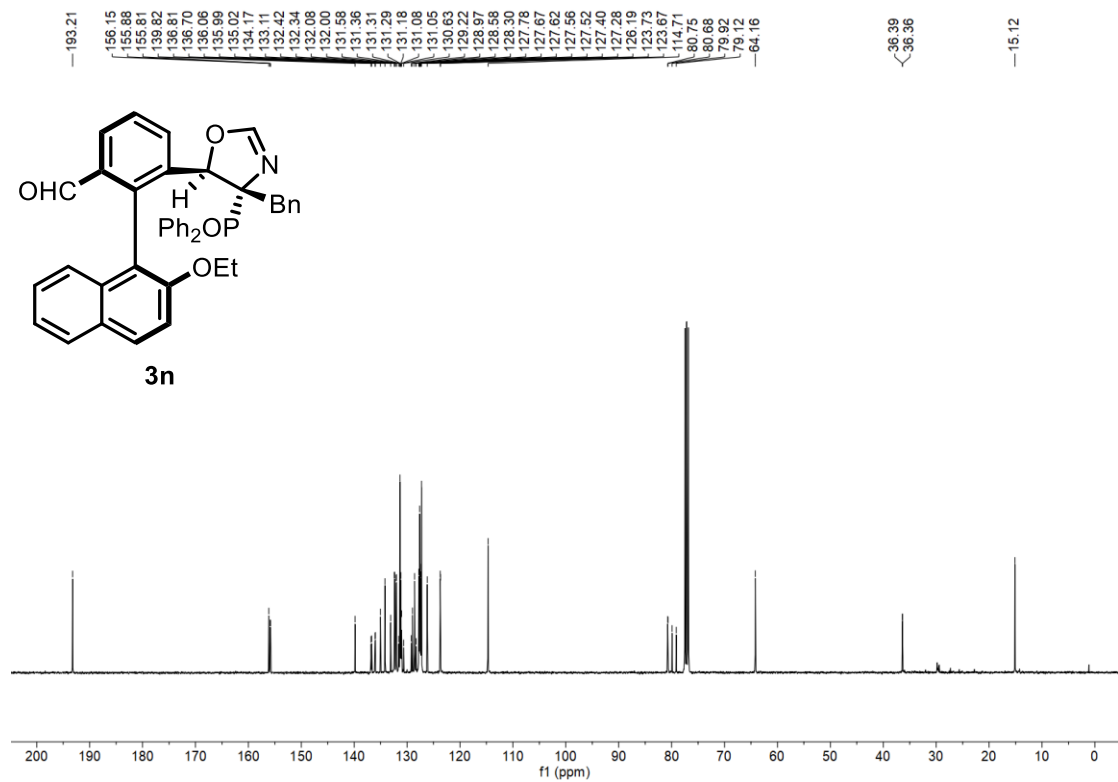

$^{31}\text{P}$  NMR (162 MHz,  $\text{CDCl}_3$ )

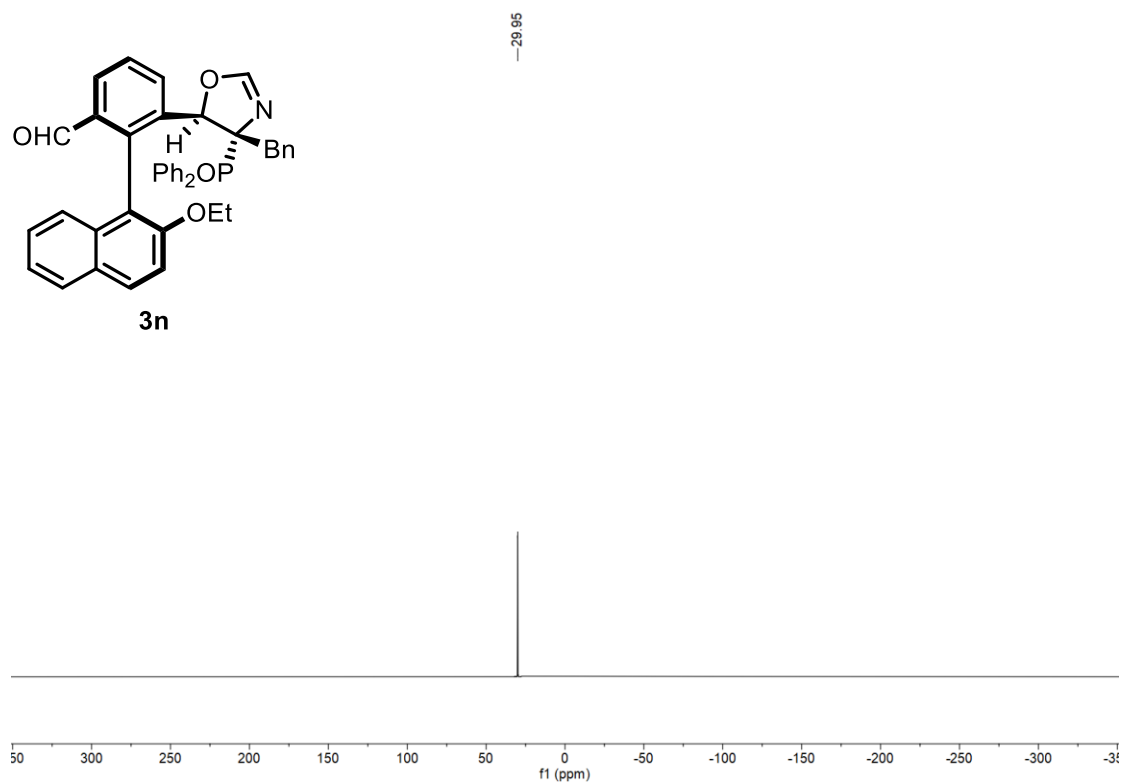

$^1\text{H}$  NMR (400 MHz,  $\text{CDCl}_3$ )

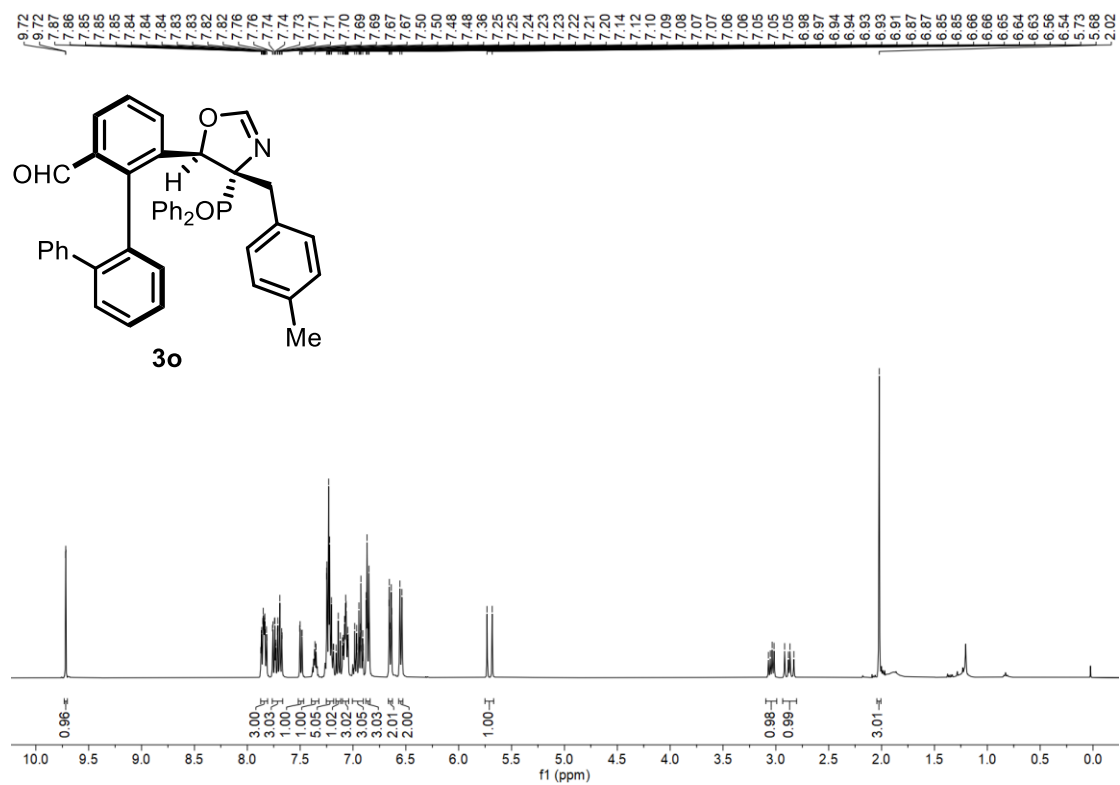



**<sup>13</sup>C NMR (101 MHz, CDCl<sub>3</sub>)**

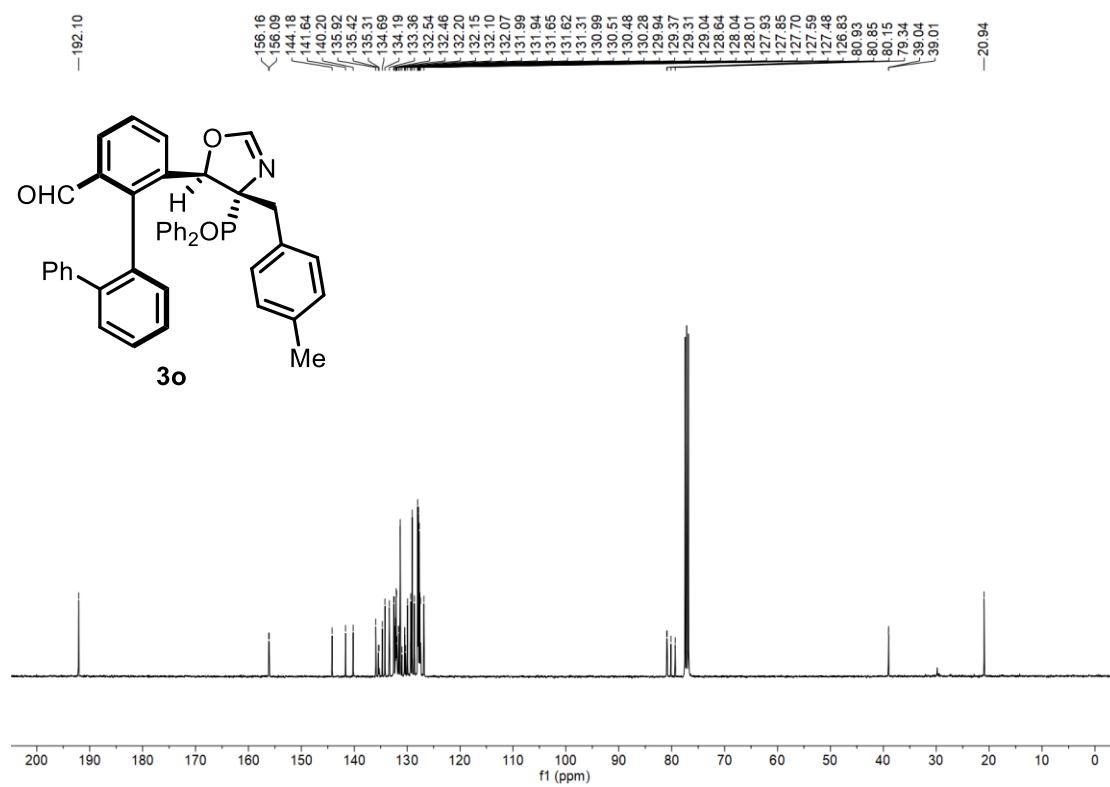

**<sup>31</sup>P NMR (162 MHz, CDCl<sub>3</sub>)**

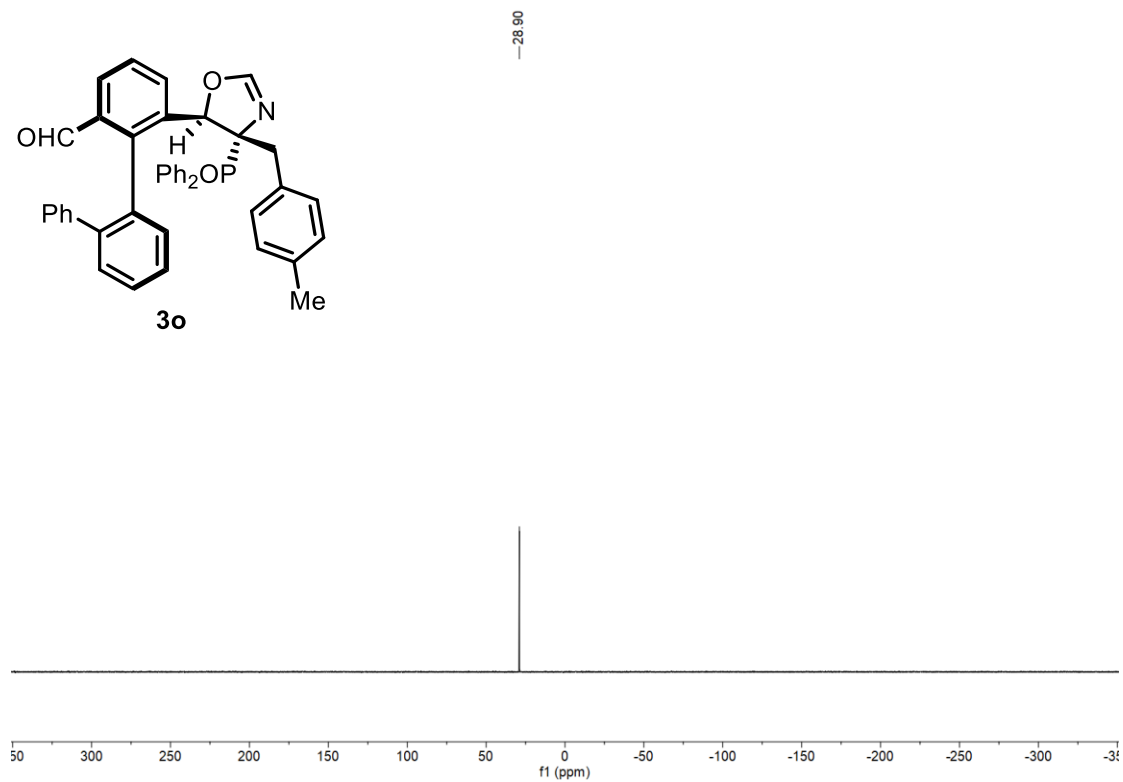

<sup>1</sup>H NMR (400 MHz, CDCl<sub>3</sub>)

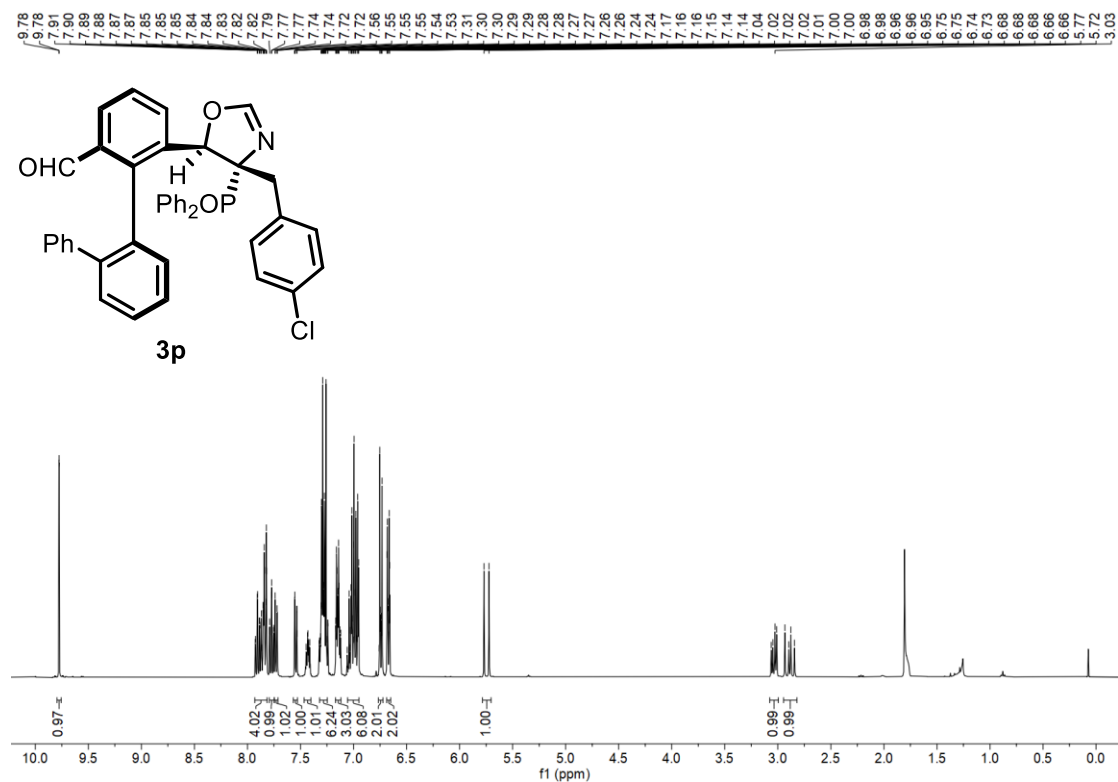

<sup>13</sup>C NMR (101 MHz, CDCl<sub>3</sub>)

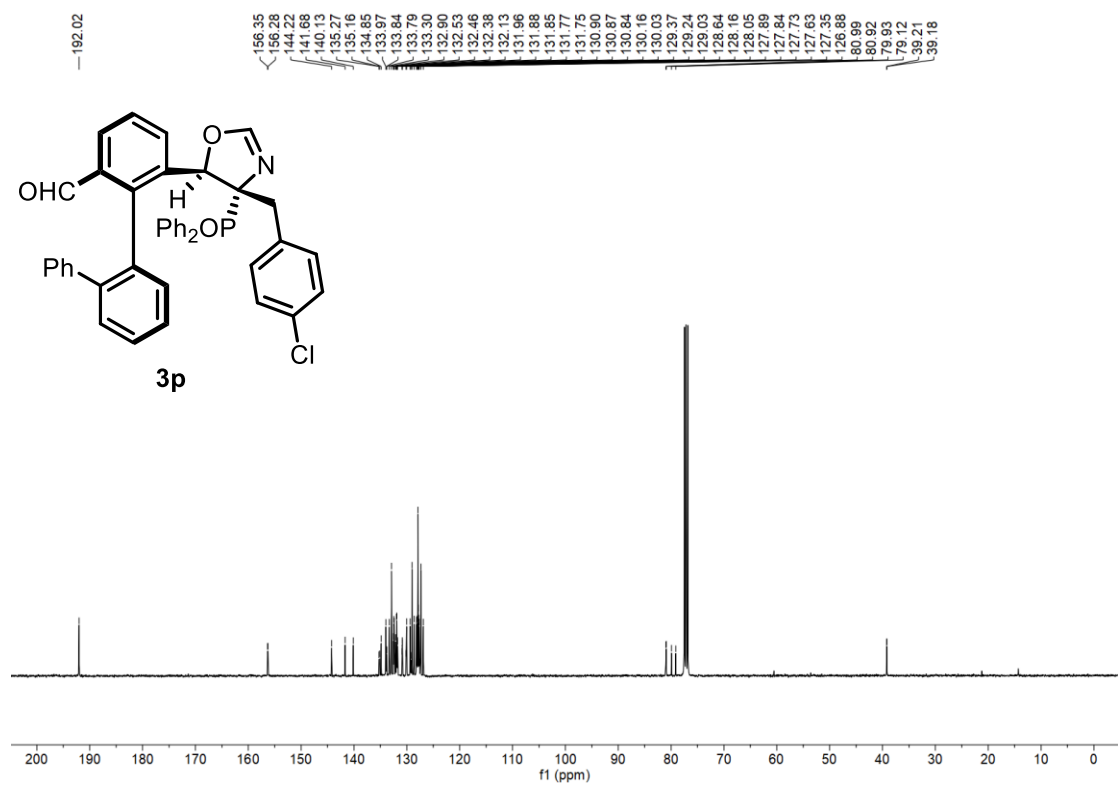

**<sup>31</sup>P NMR (162 MHz, CDCl<sub>3</sub>)**

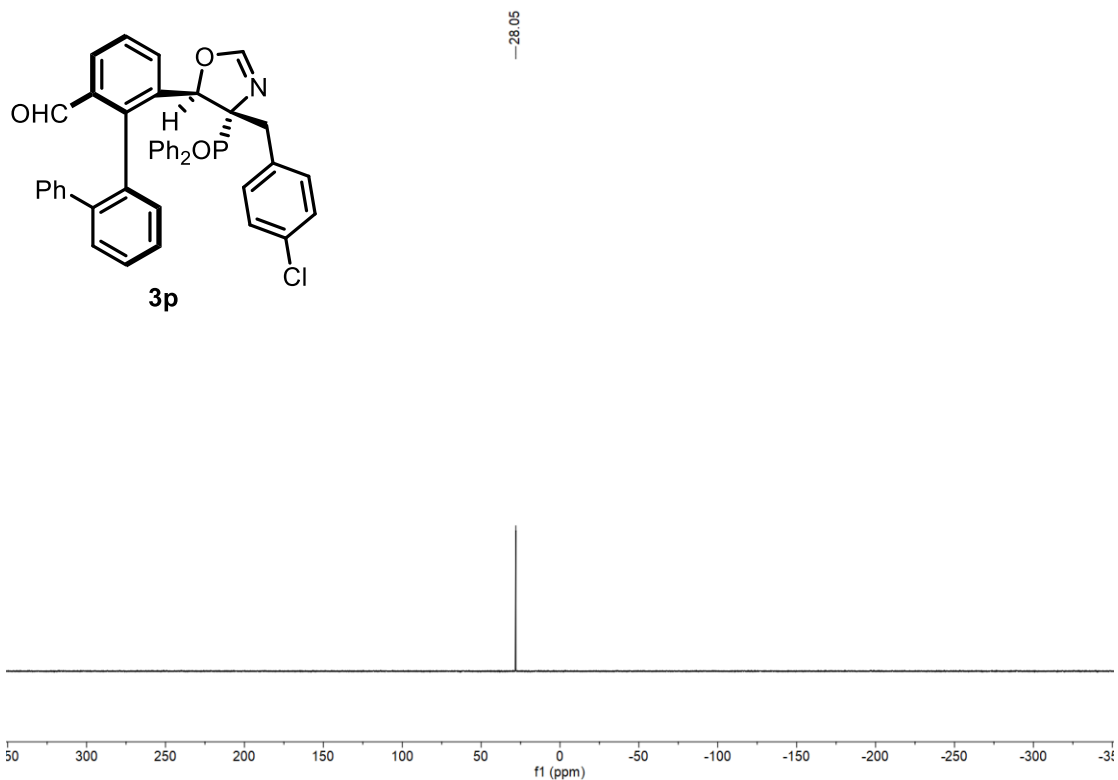

**<sup>1</sup>H NMR (400 MHz, CDCl<sub>3</sub>)**

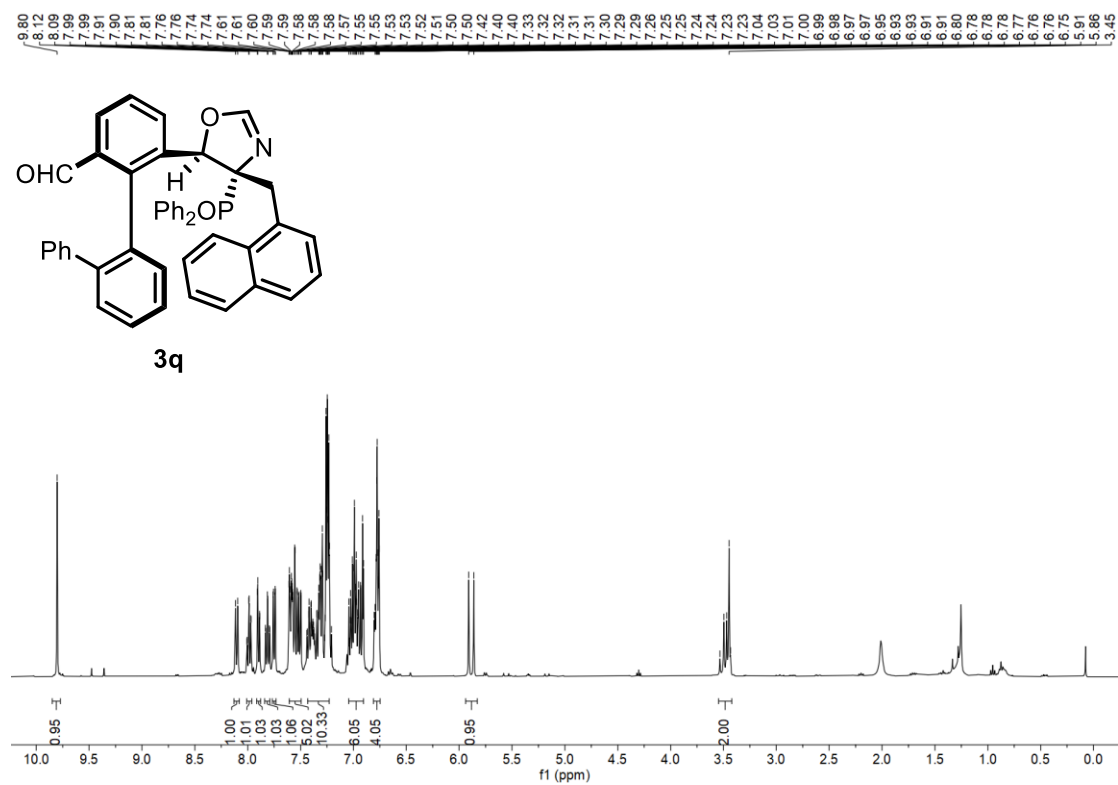

<sup>13</sup>C NMR (101 MHz, CDCl<sub>3</sub>)

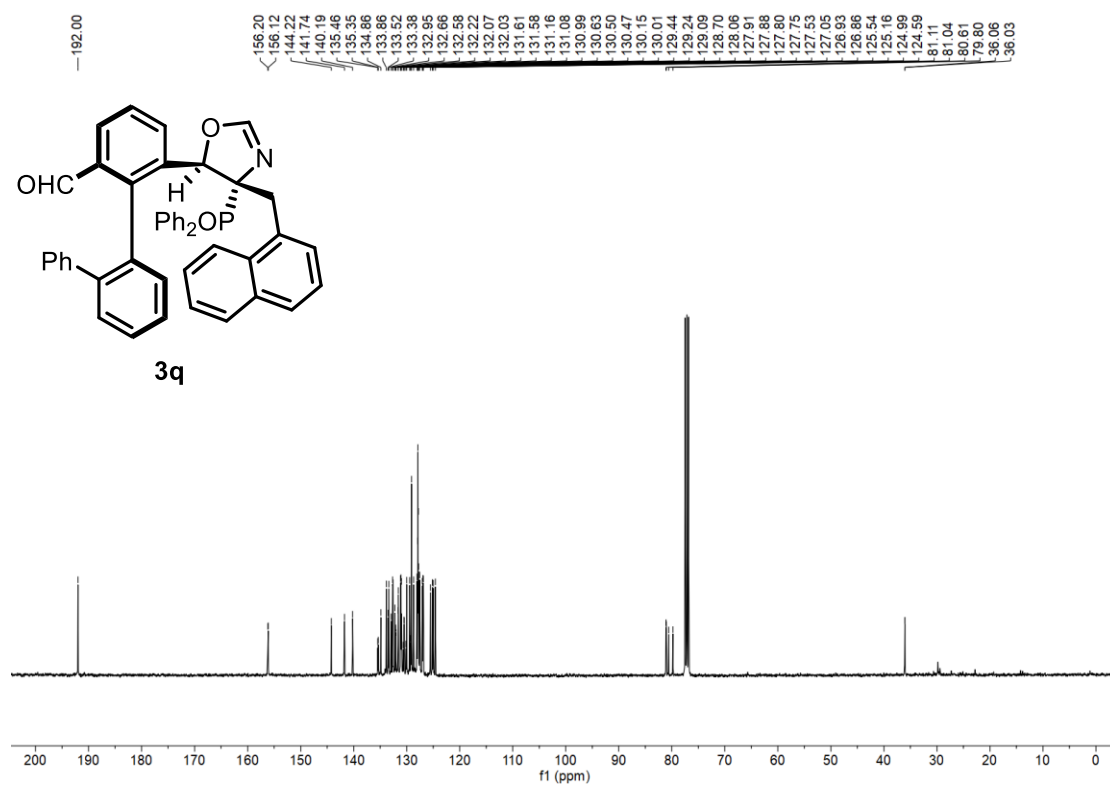

<sup>31</sup>P NMR (162 MHz, CDCl<sub>3</sub>)

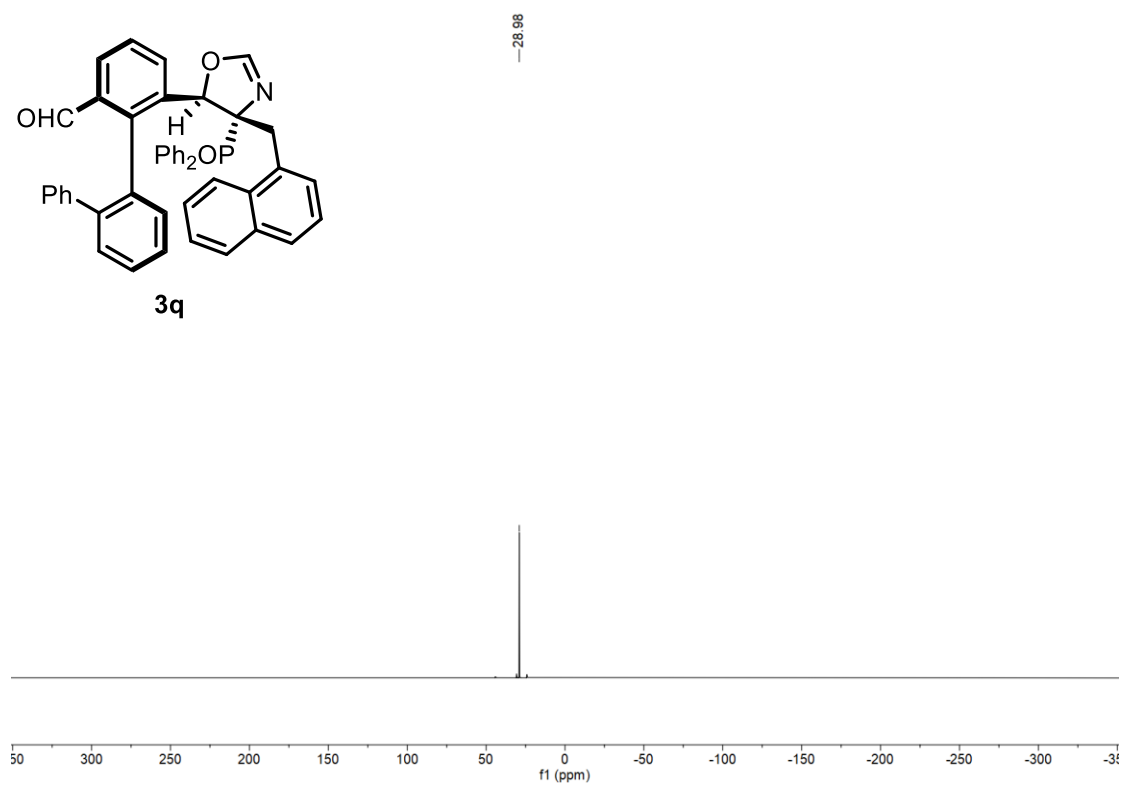

### $^1\text{H}$ NMR (400 MHz, $\text{CDCl}_3$ )

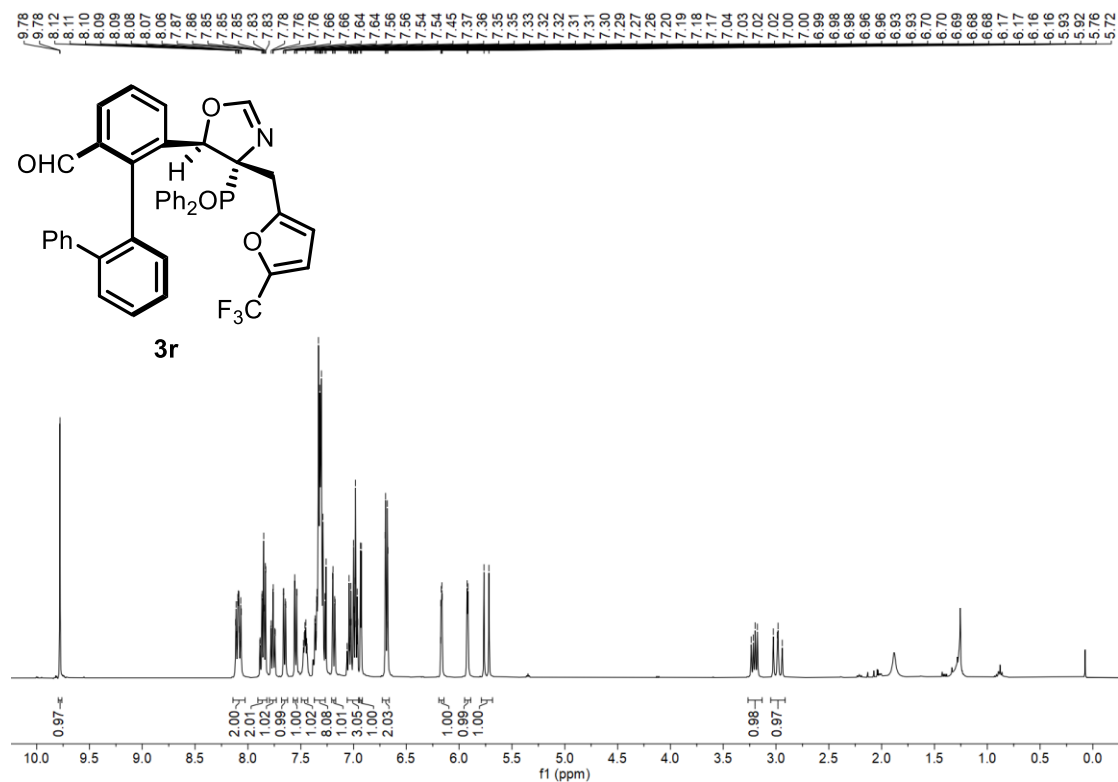

### $^{13}\text{C}$ NMR (101 MHz, $\text{CDCl}_3$ )

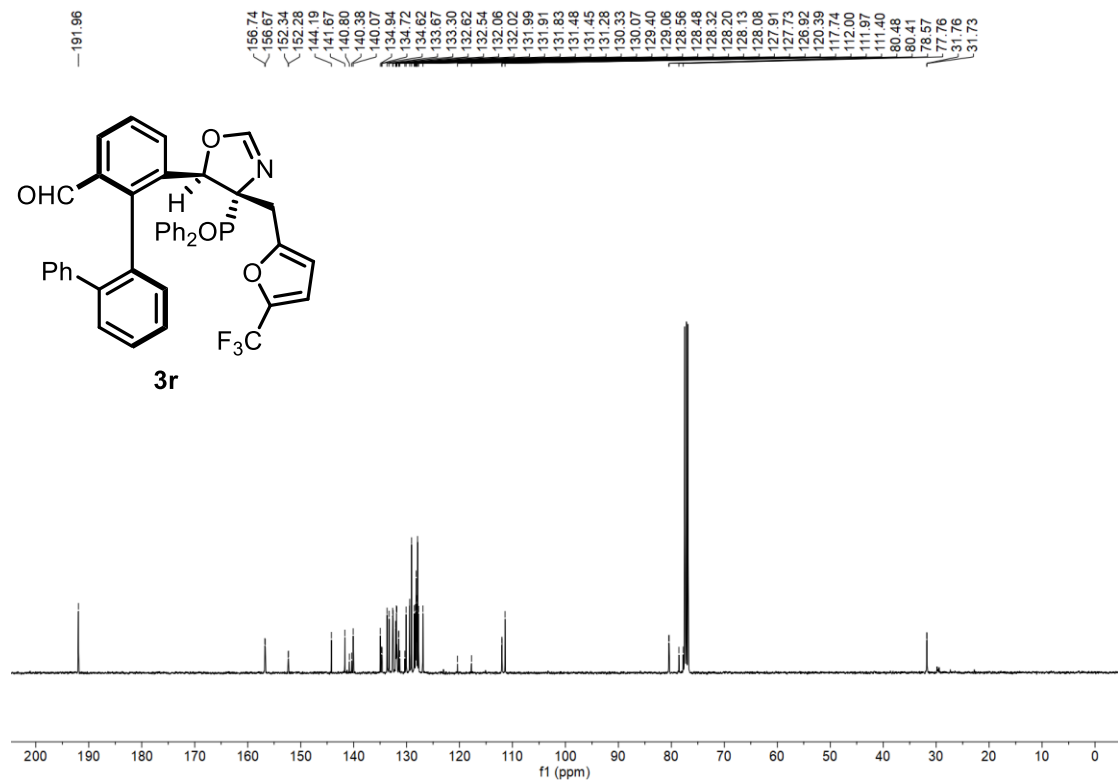

**<sup>19</sup>F NMR (376 MHz, CDCl<sub>3</sub>)**

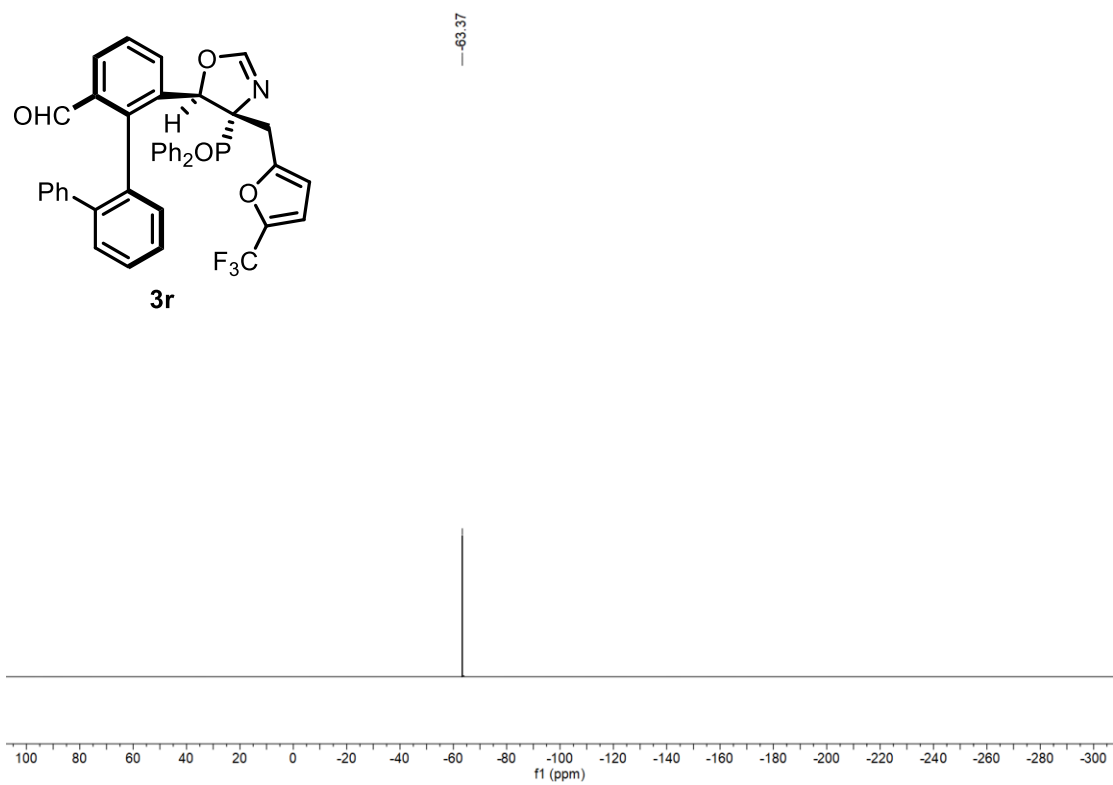

**<sup>31</sup>P NMR (162 MHz, CDCl<sub>3</sub>)**

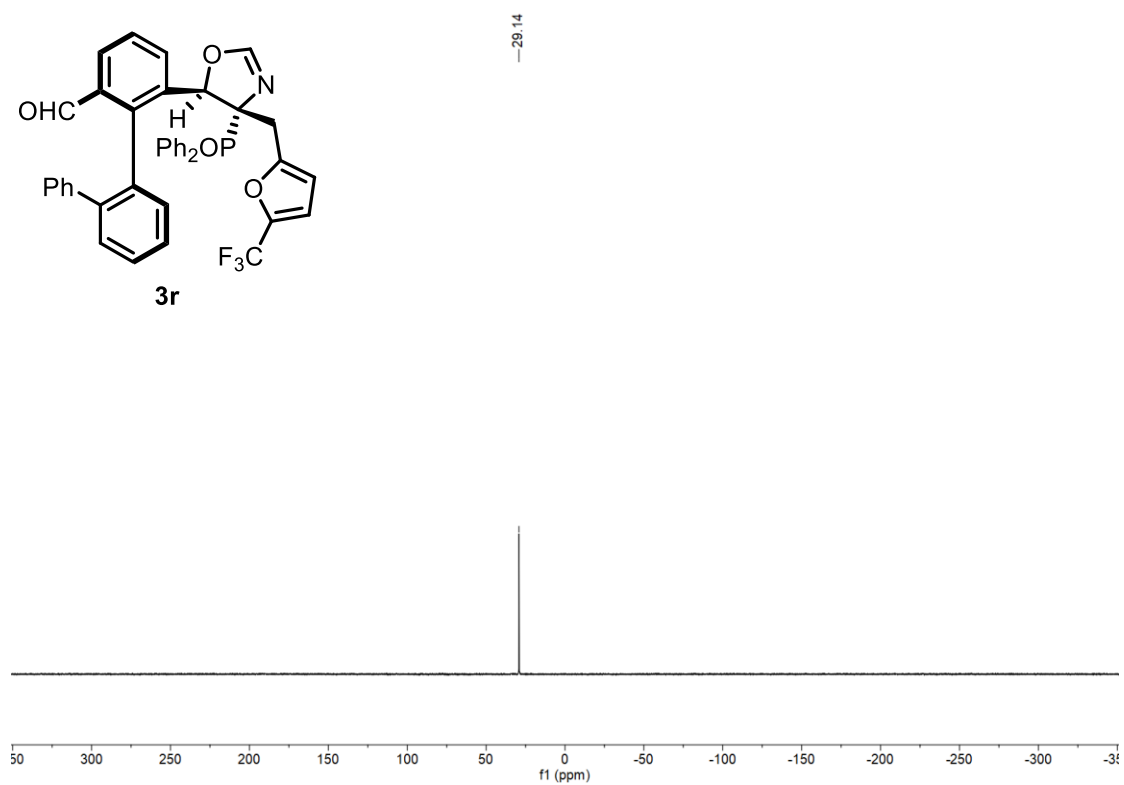

<sup>1</sup>H NMR (400 MHz, CDCl<sub>3</sub>)

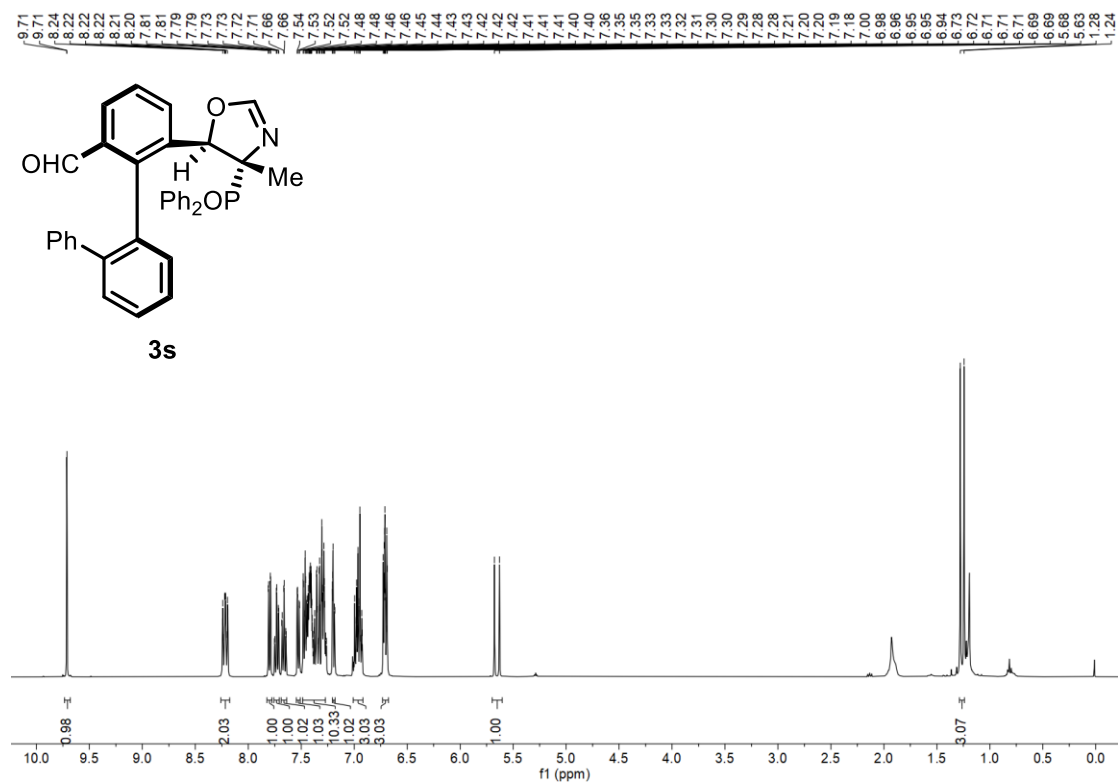

<sup>13</sup>C NMR (101 MHz, CDCl<sub>3</sub>)

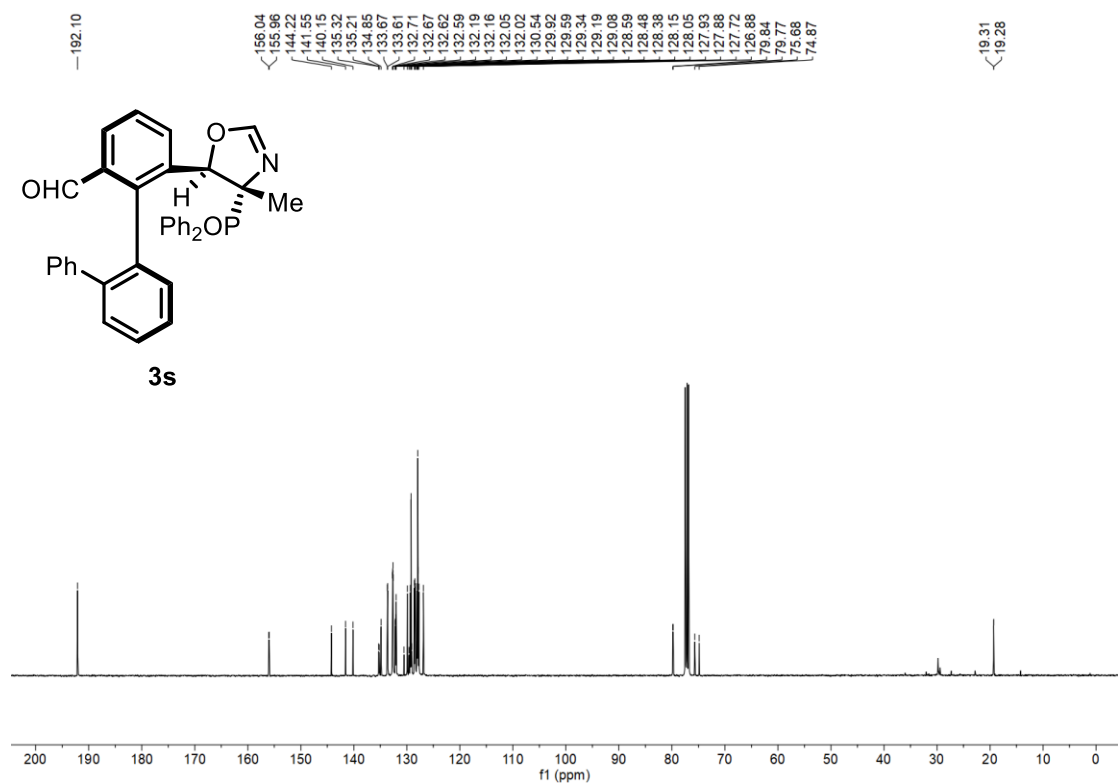

**<sup>31</sup>P NMR (162 MHz, CDCl<sub>3</sub>)**

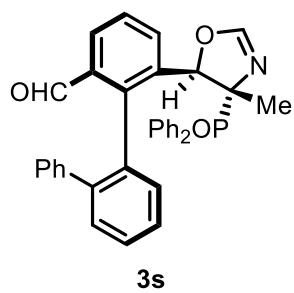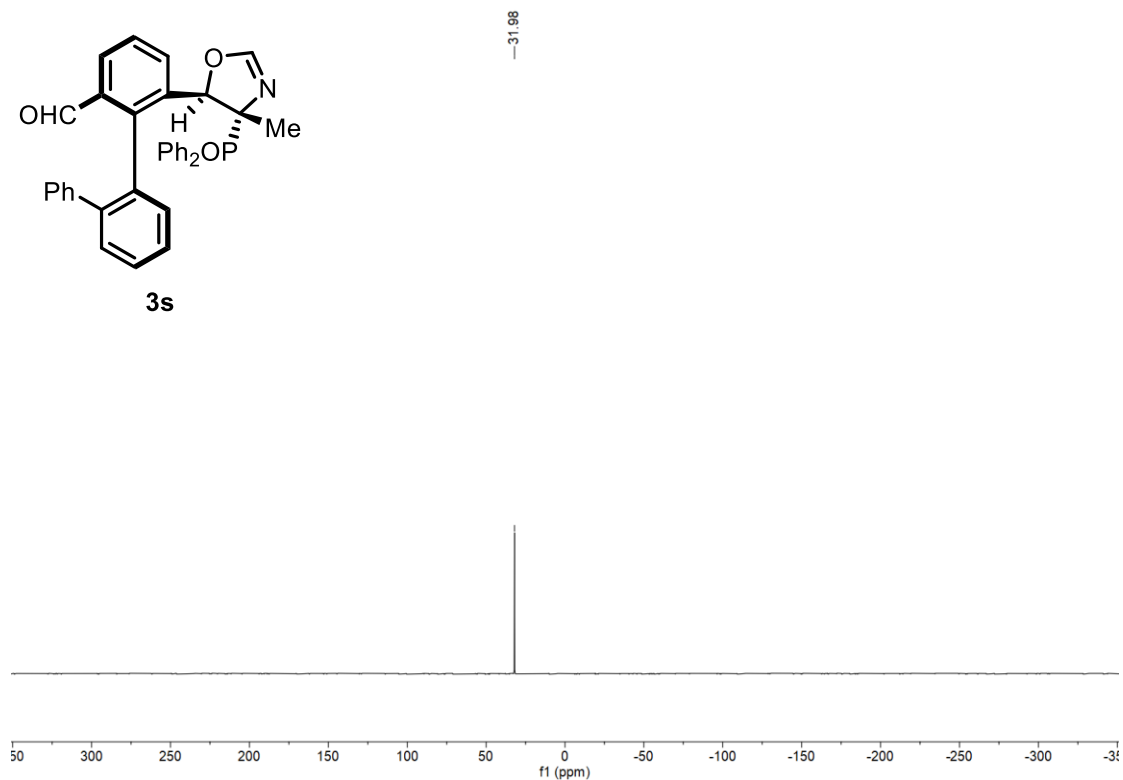

**<sup>1</sup>H NMR (400 MHz, CDCl<sub>3</sub>)**

9.77, 9.77, 7.85, 7.85, 7.83, 7.83, 7.72, 7.72, 7.71, 7.71, 7.70, 7.69, 7.69, 7.69, 7.68, 7.67, 7.67, 7.62, 7.62, 7.61, 7.60, 7.60, 7.59, 7.59, 7.36, 7.34, 7.34, 7.32, 7.32, 7.32, 7.26, 7.26, 7.24, 7.24, 7.22, 7.21, 7.21, 7.21, 7.20, 7.20, 7.19, 7.19, 7.19, 7.10, 7.09, 7.09, 7.08, 7.08, 7.07, 7.07, 7.07, 6.86, 6.89, 6.87, 6.87, 6.86, 6.86, 6.86, 6.85, 6.85, 6.67, 6.67, 6.66, 6.66, 6.65, 6.65, 3.30, 3.30, 3.12, 3.08, 2.88, 2.85

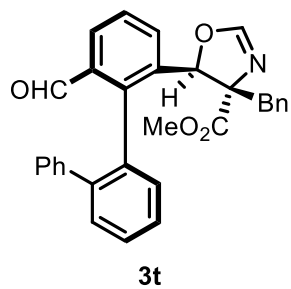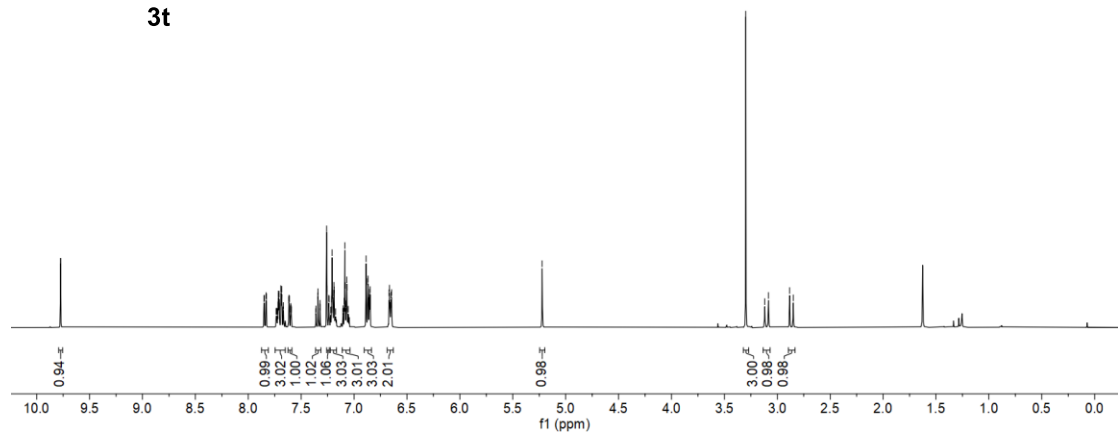



<sup>13</sup>C NMR (101 MHz, CDCl<sub>3</sub>)

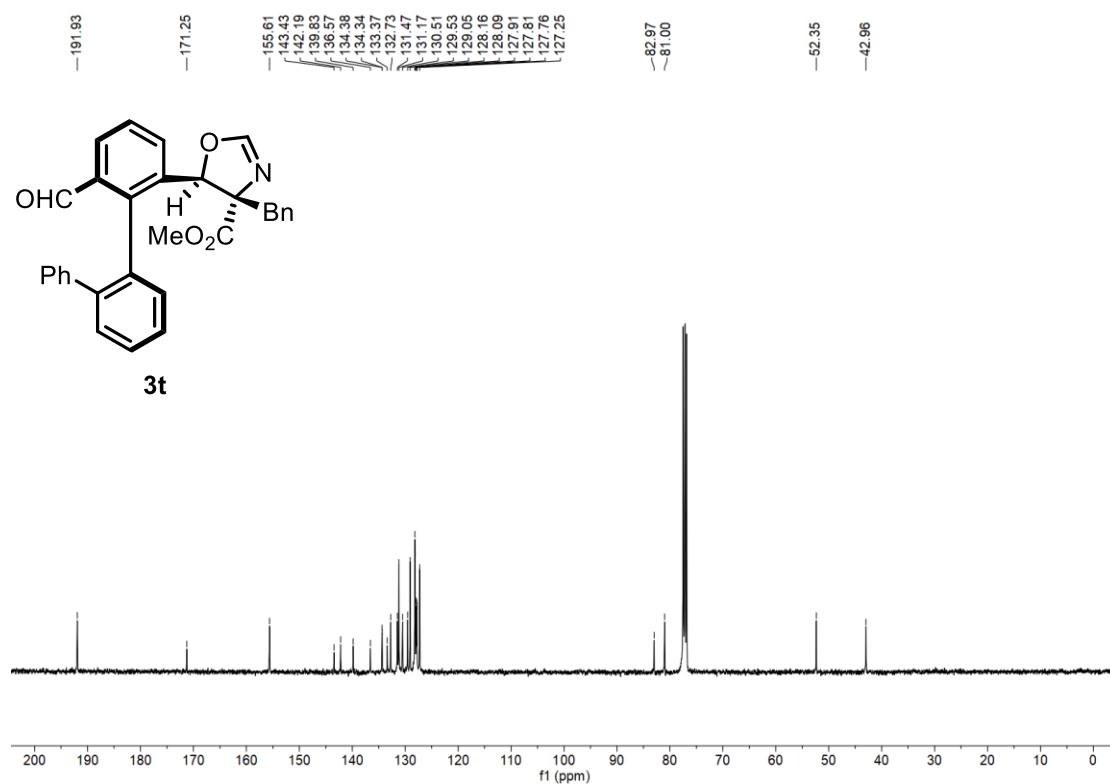

<sup>1</sup>H NMR (400 MHz, CDCl<sub>3</sub>)

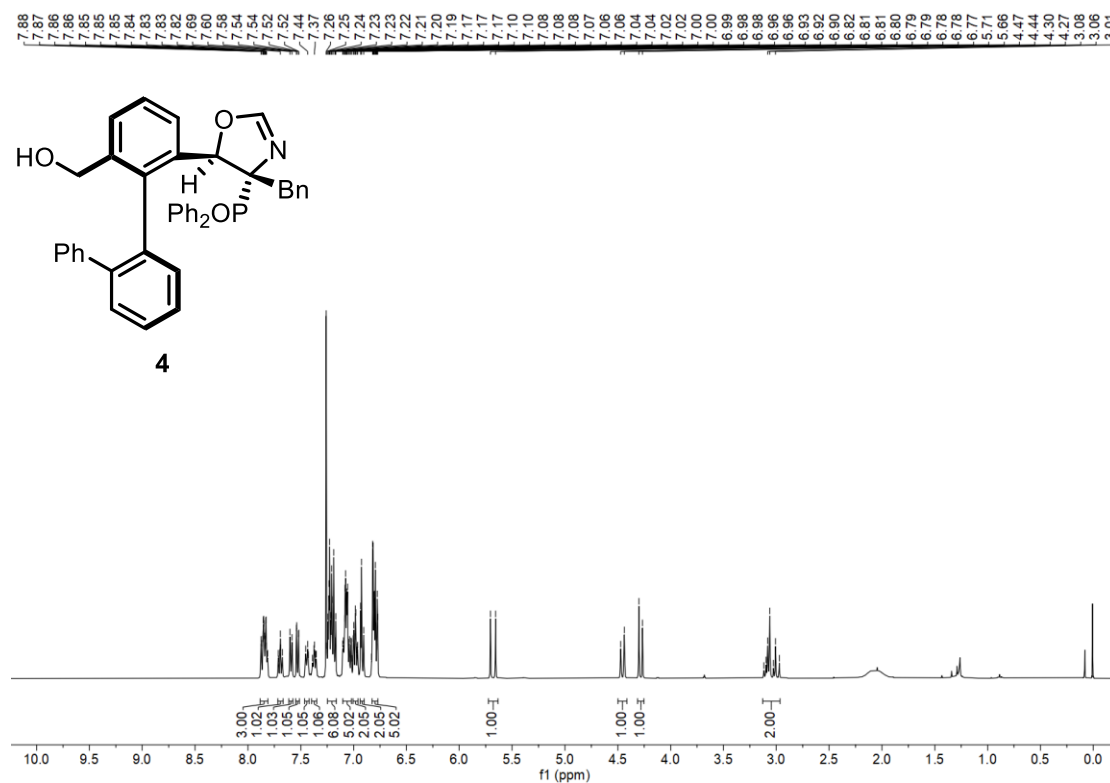

<sup>13</sup>C NMR (101 MHz, CDCl<sub>3</sub>)

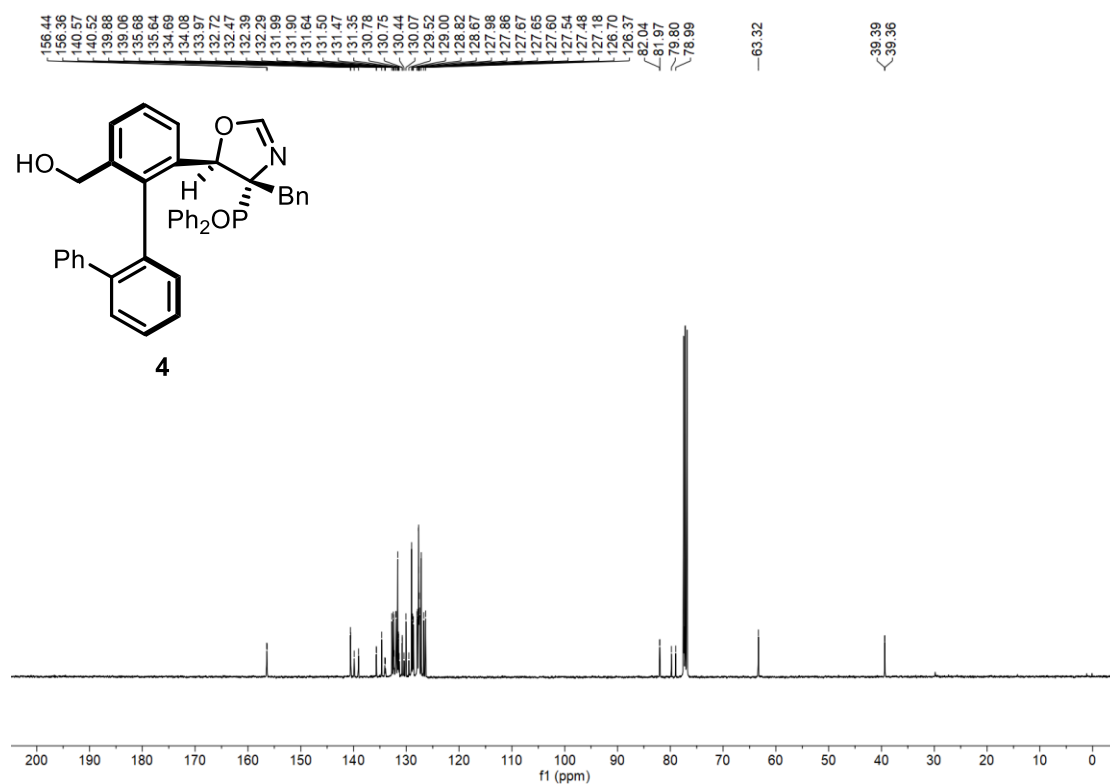

<sup>31</sup>P NMR (162 MHz, CDCl<sub>3</sub>)

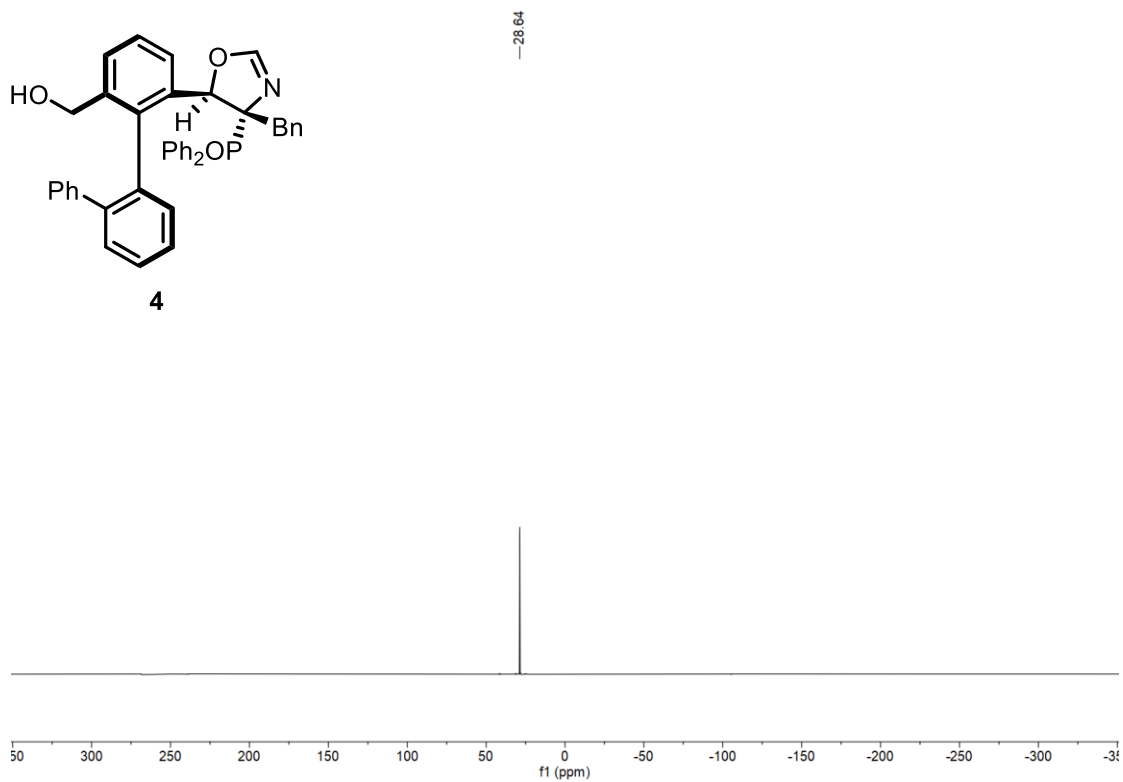

<sup>1</sup>H NMR (400 MHz, DMSO-d<sub>6</sub>)

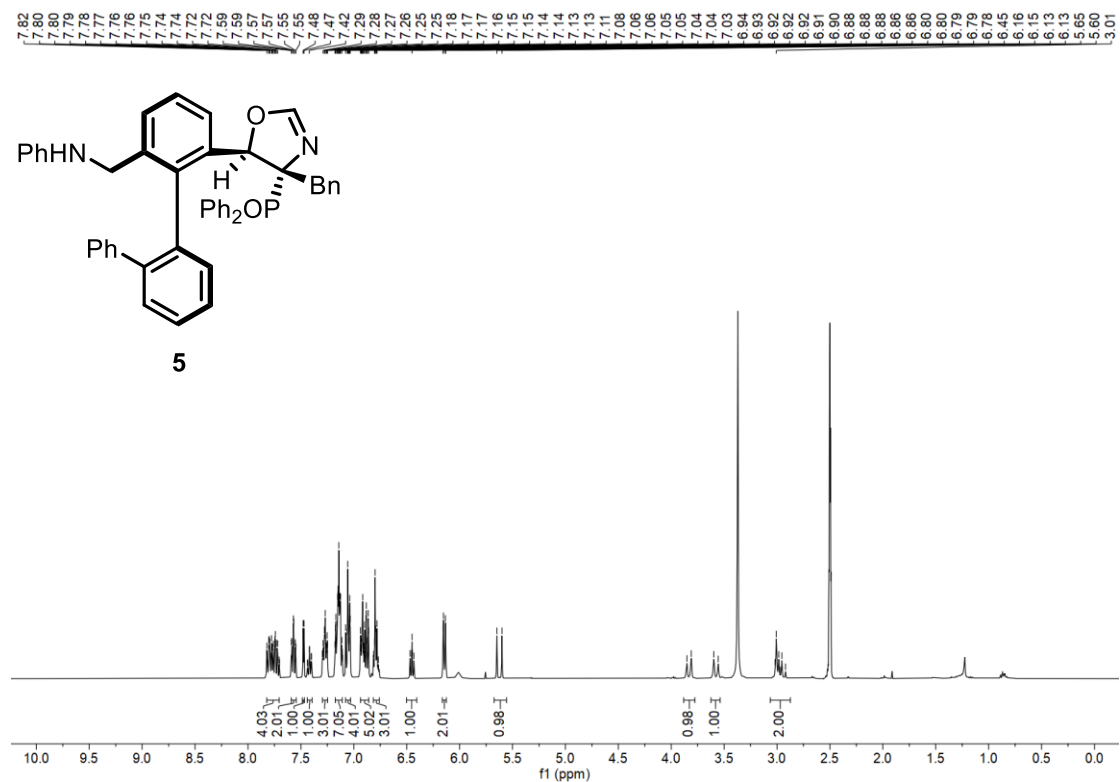

<sup>13</sup>C NMR (101 MHz, DMSO-d<sub>6</sub>)

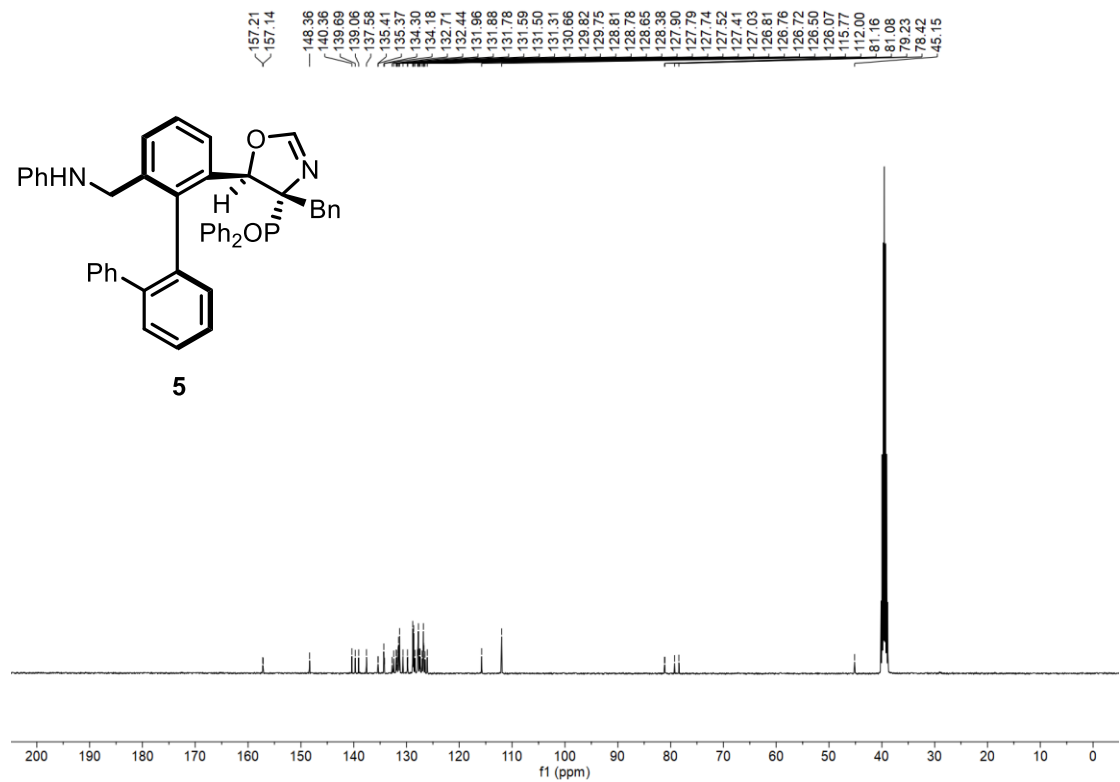

<sup>31</sup>P NMR (162 MHz, CDCl<sub>3</sub>)

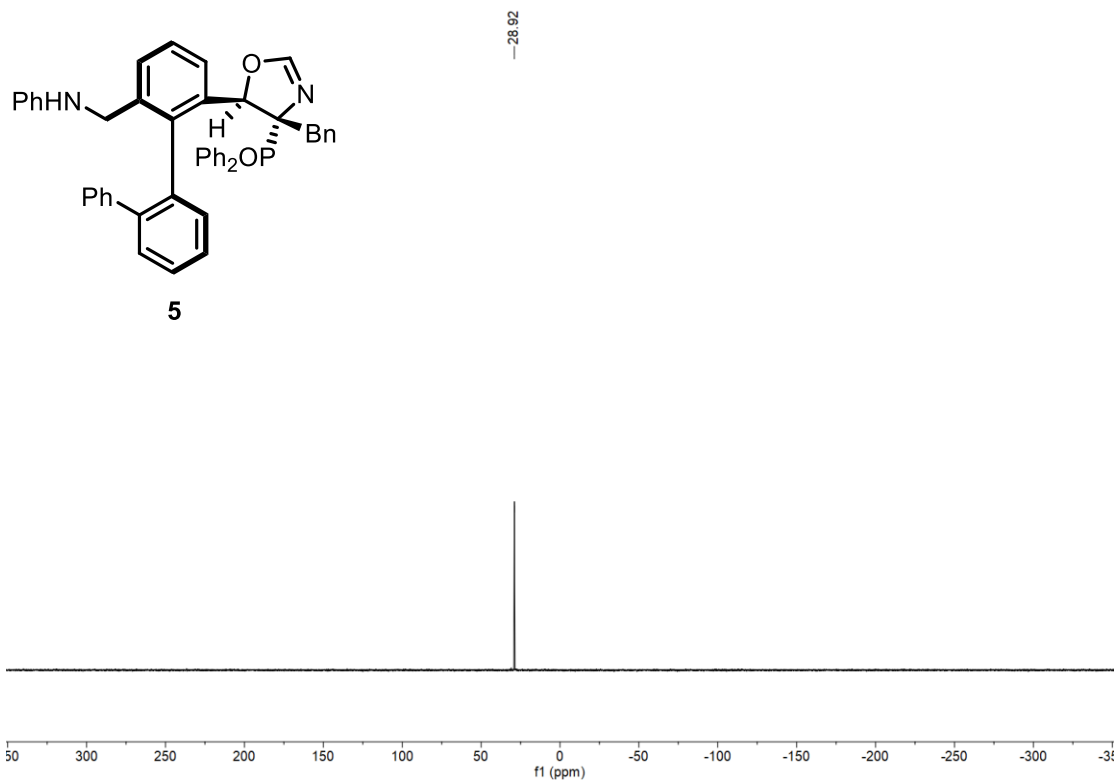

<sup>1</sup>H NMR (400 MHz, CDCl<sub>3</sub>)

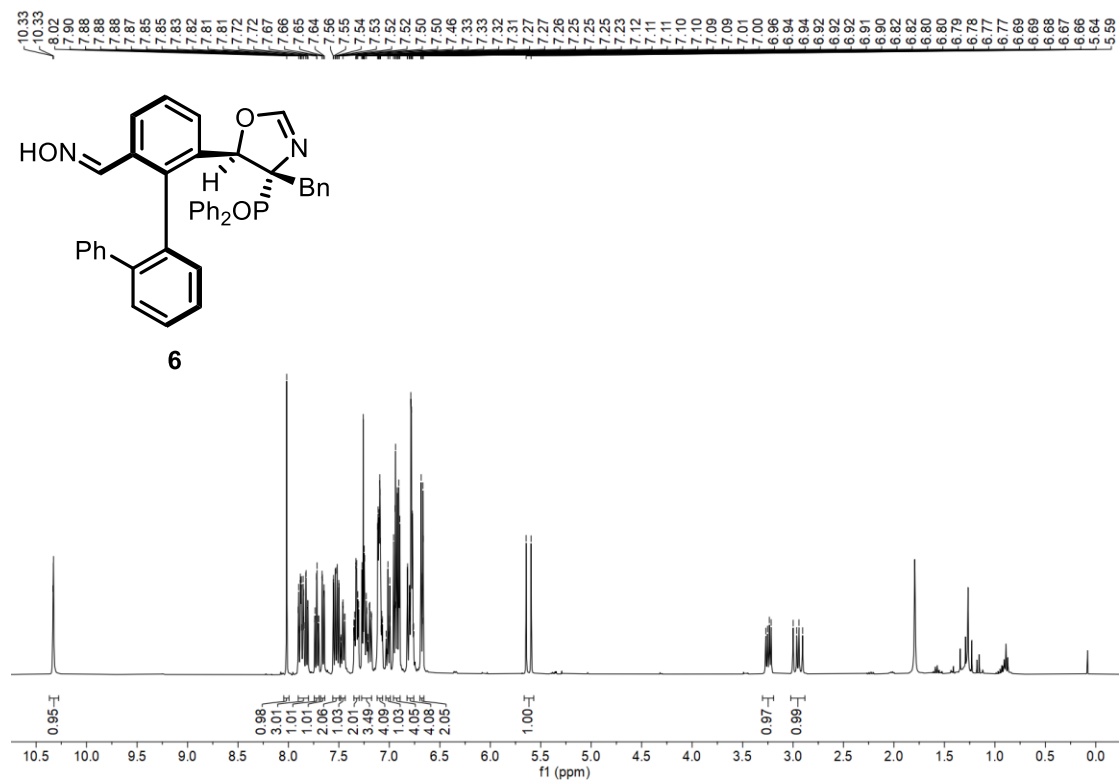

<sup>13</sup>C NMR (101 MHz, CDCl<sub>3</sub>)

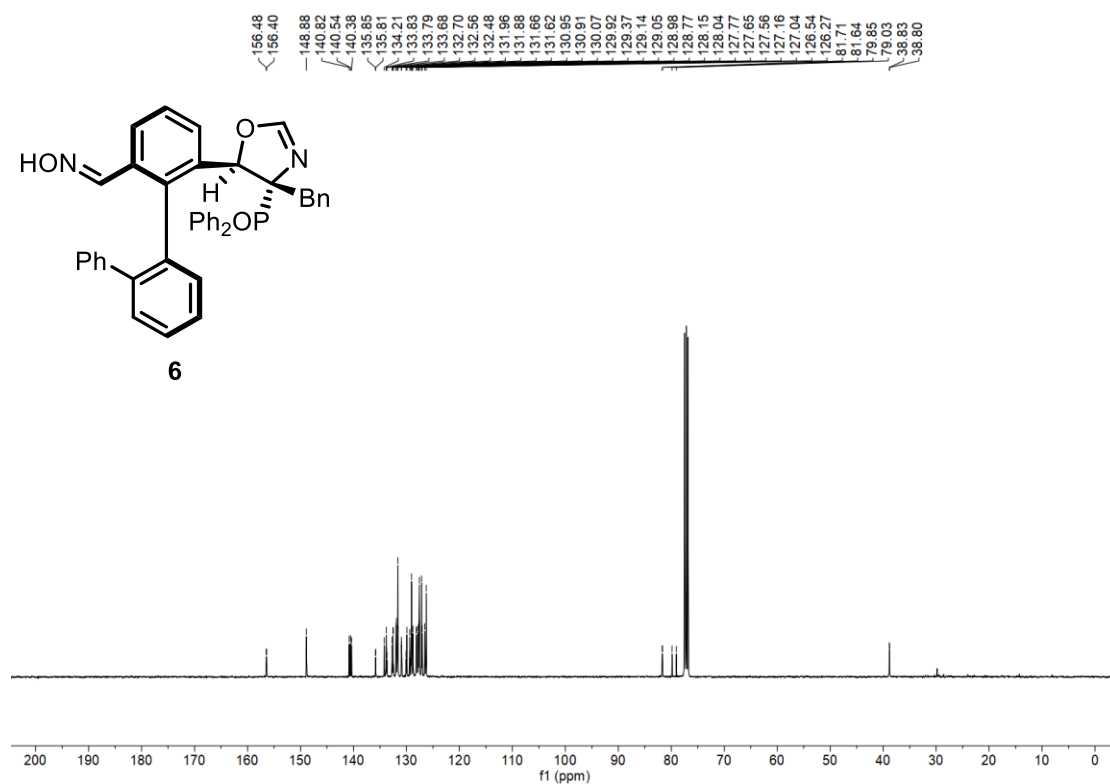

<sup>31</sup>P NMR (162 MHz, CDCl<sub>3</sub>)

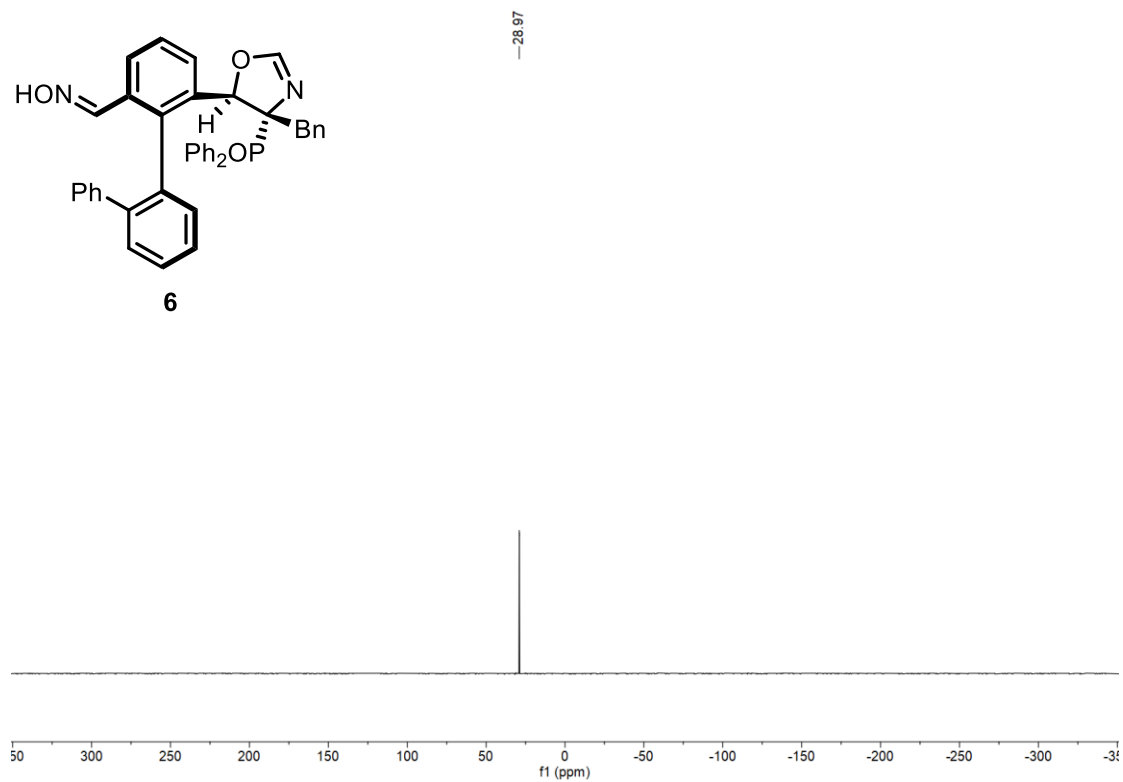

<sup>1</sup>H NMR (400 MHz, CDCl<sub>3</sub>)

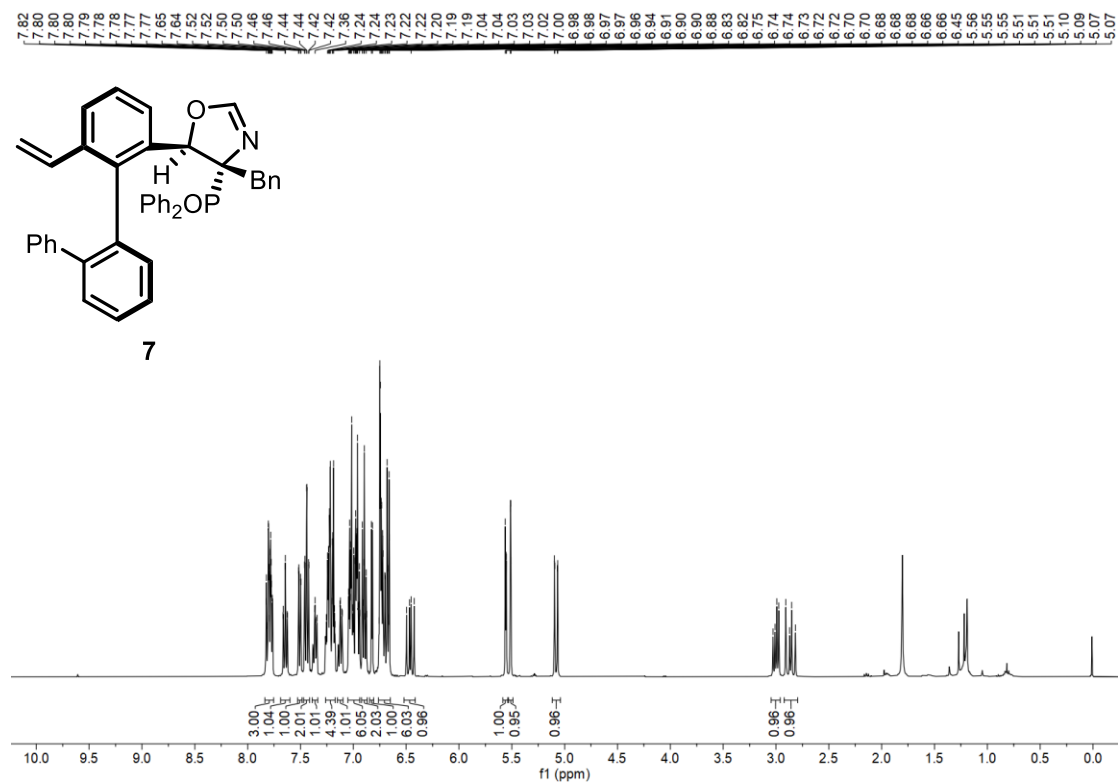

<sup>13</sup>C NMR (101 MHz, CDCl<sub>3</sub>)

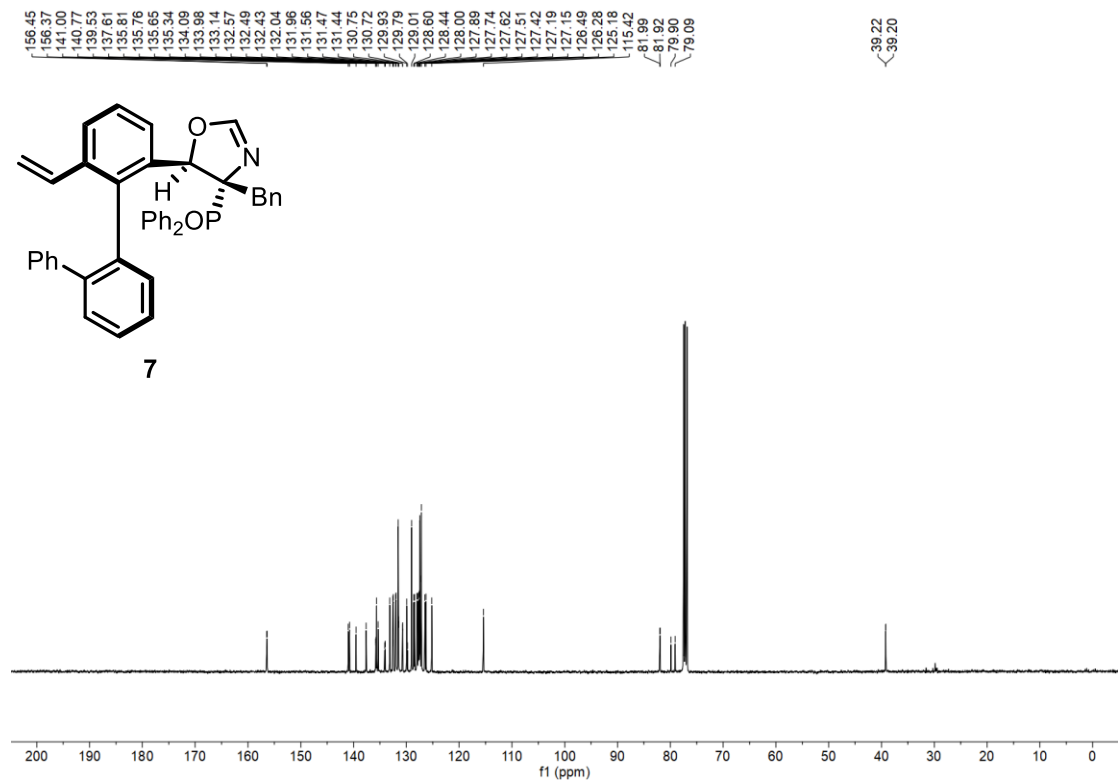

**<sup>31</sup>P NMR (162 MHz, CDCl<sub>3</sub>)**

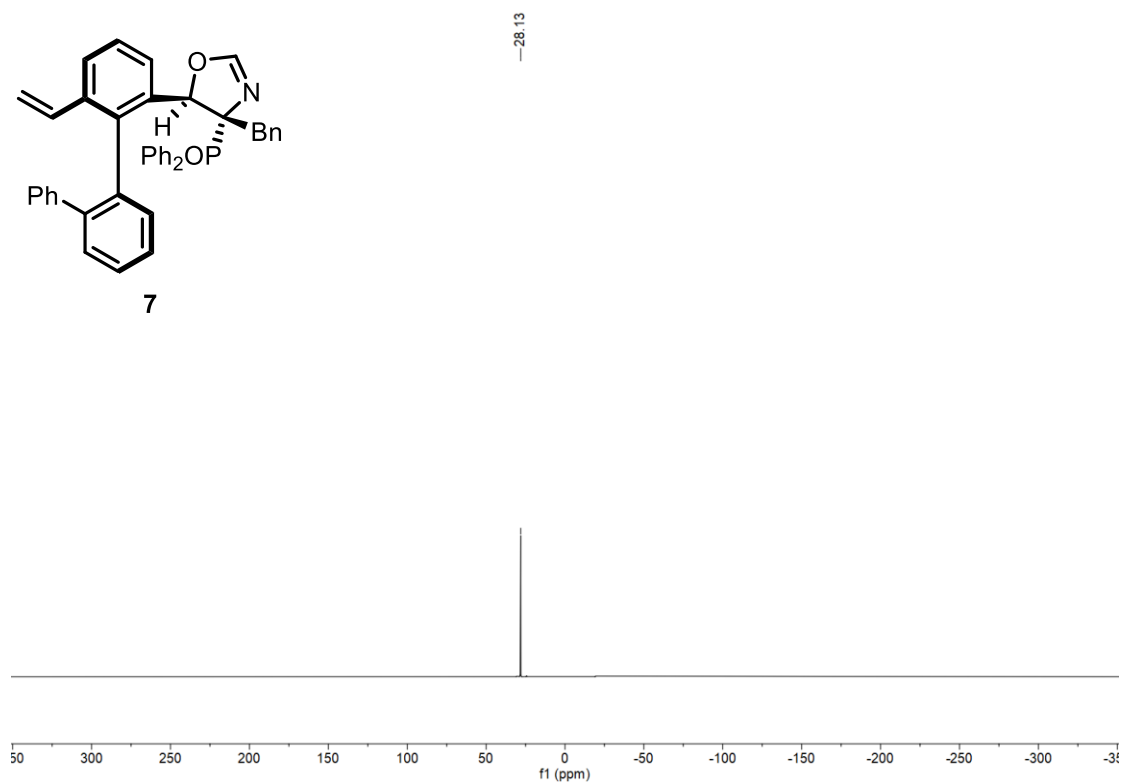

**<sup>1</sup>H NMR (400 MHz, CDCl<sub>3</sub>)**

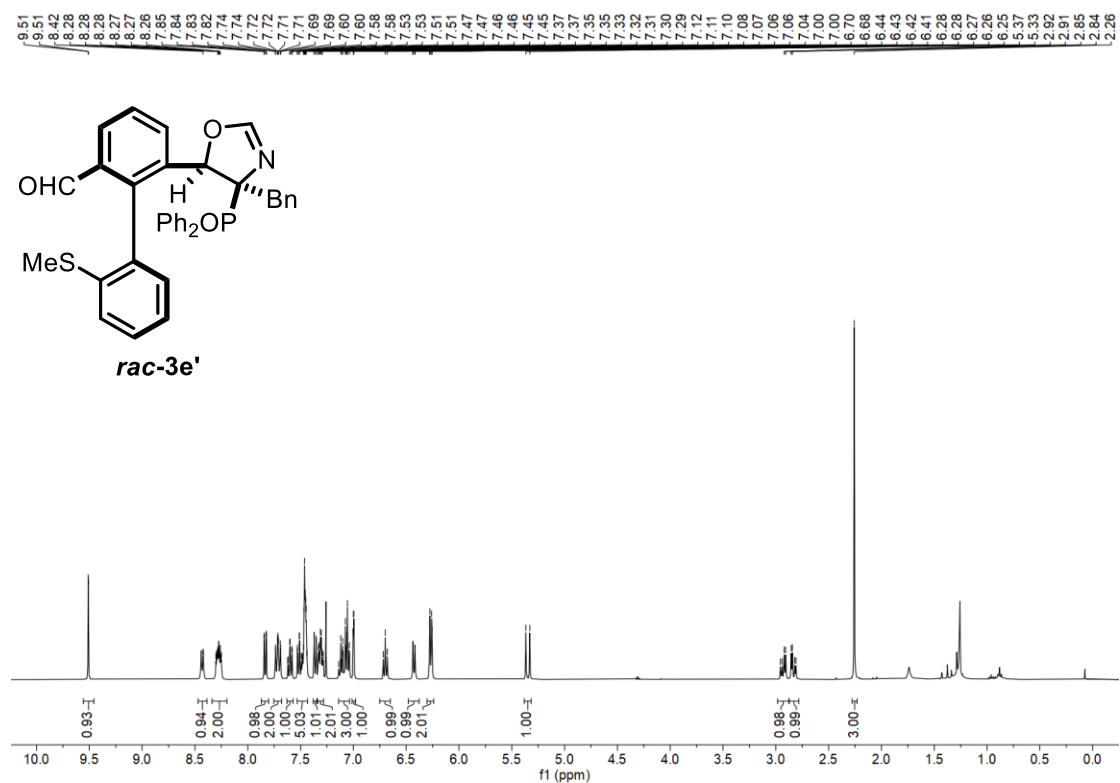

<sup>13</sup>C NMR (101 MHz, CDCl<sub>3</sub>)

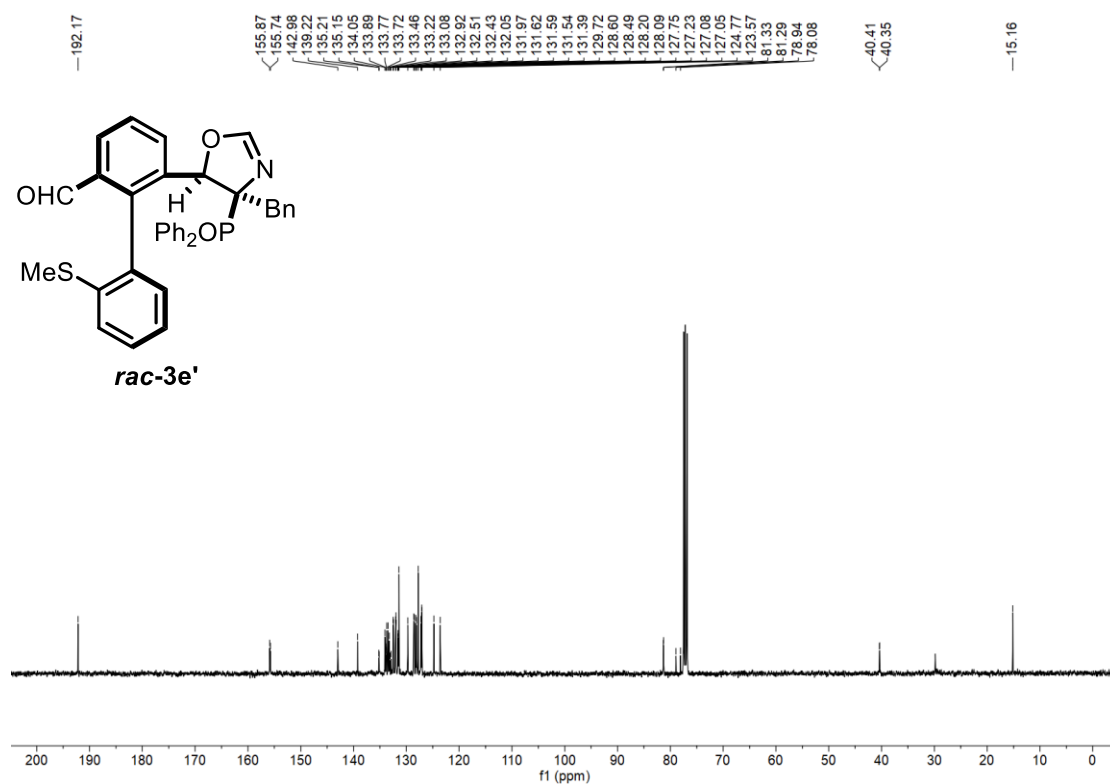

<sup>31</sup>P NMR (162 MHz, CDCl<sub>3</sub>)

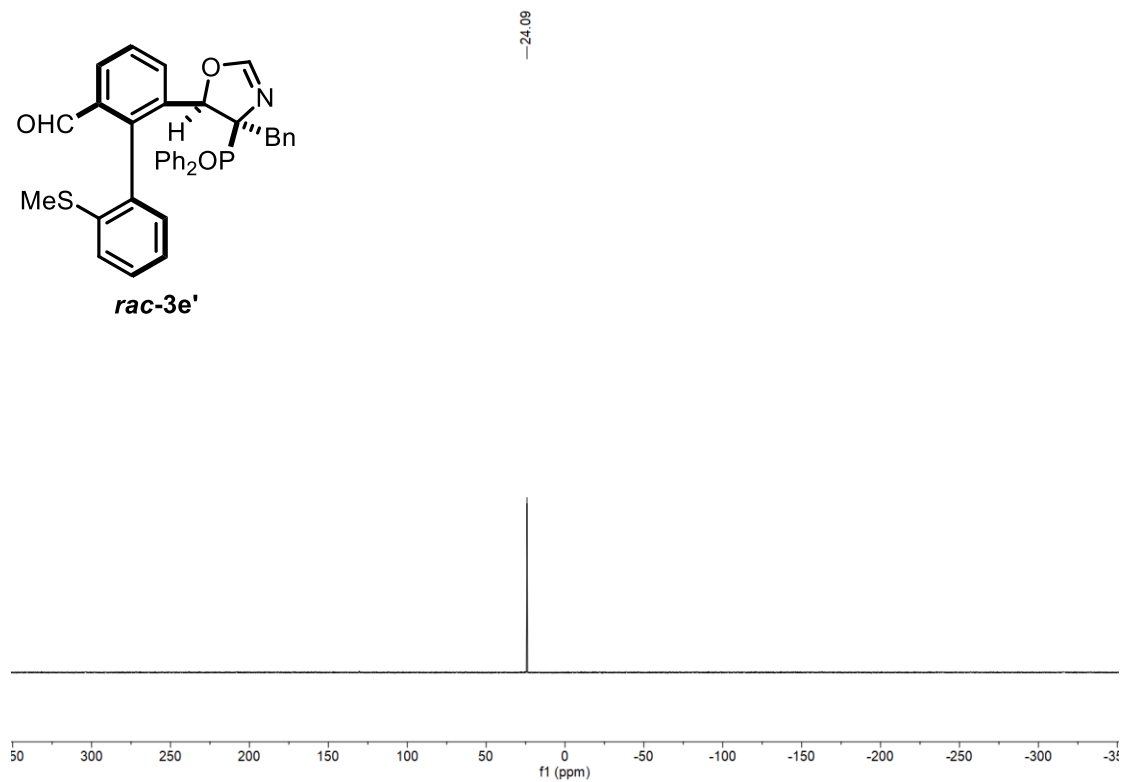



<sup>1</sup>H NMR (400 MHz, CDCl<sub>3</sub>)

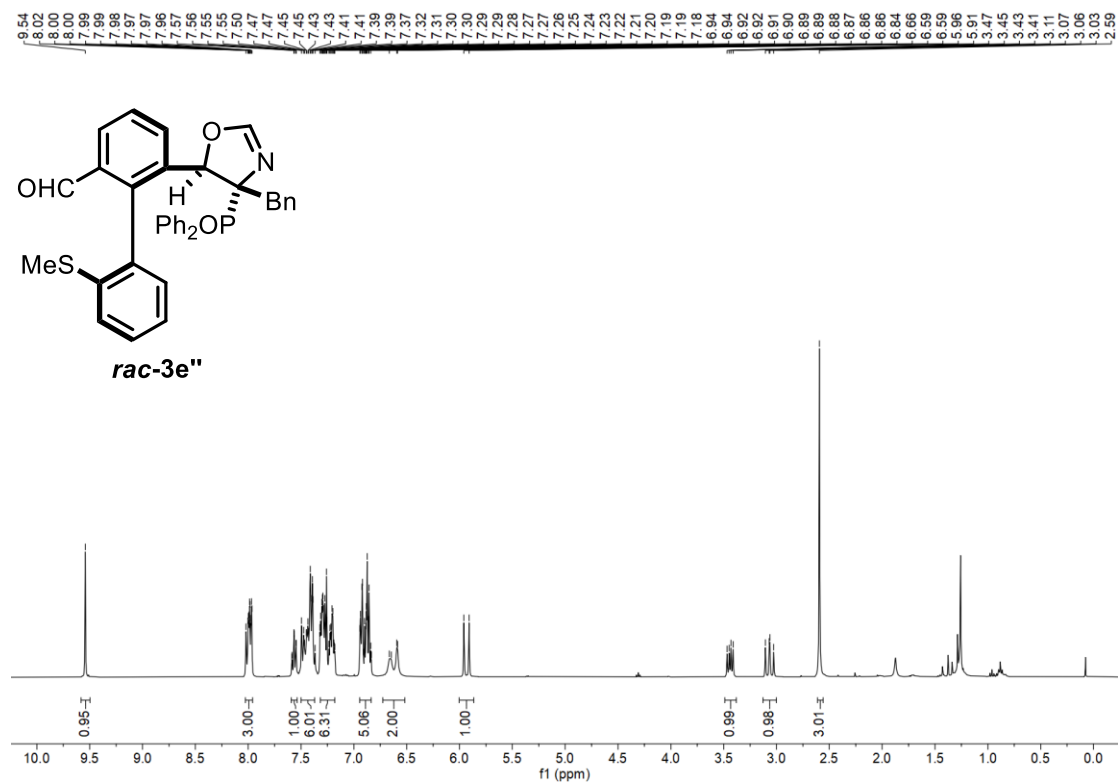

<sup>13</sup>C NMR (101 MHz, CDCl<sub>3</sub>)

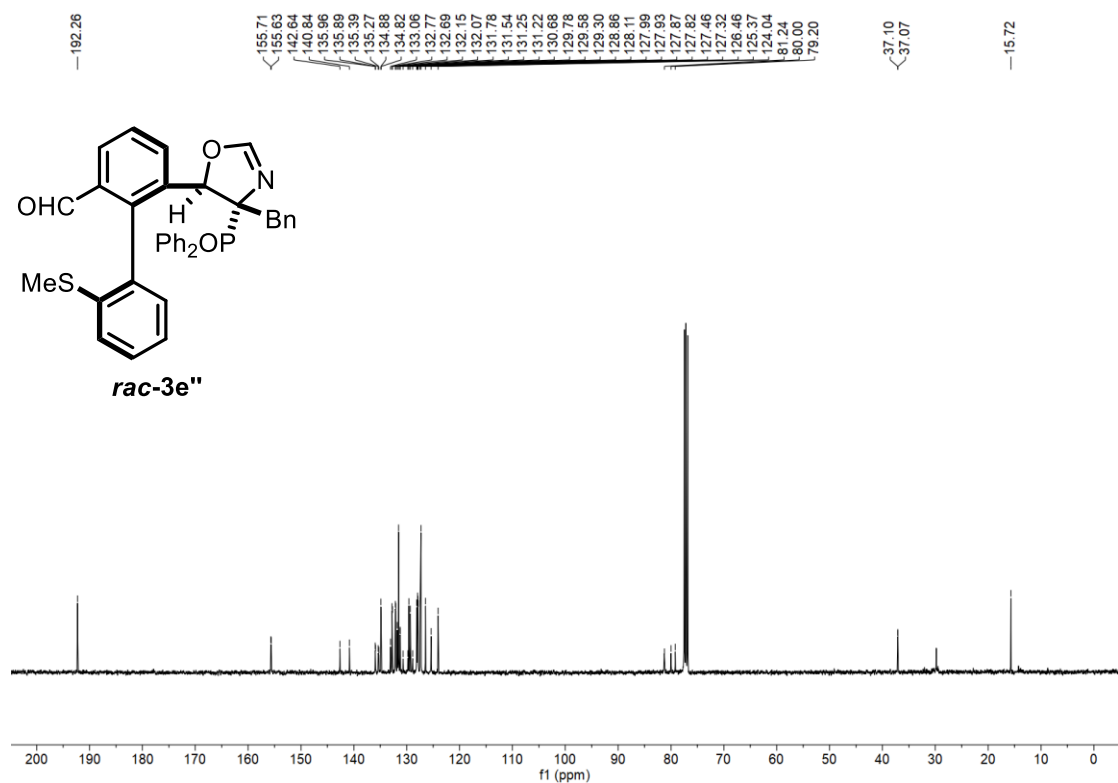

**$^{31}\text{P}$  NMR (162 MHz,  $\text{CDCl}_3$ )**

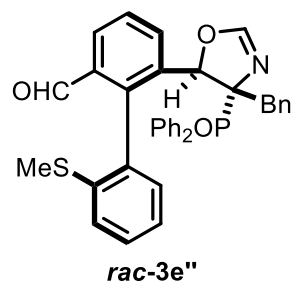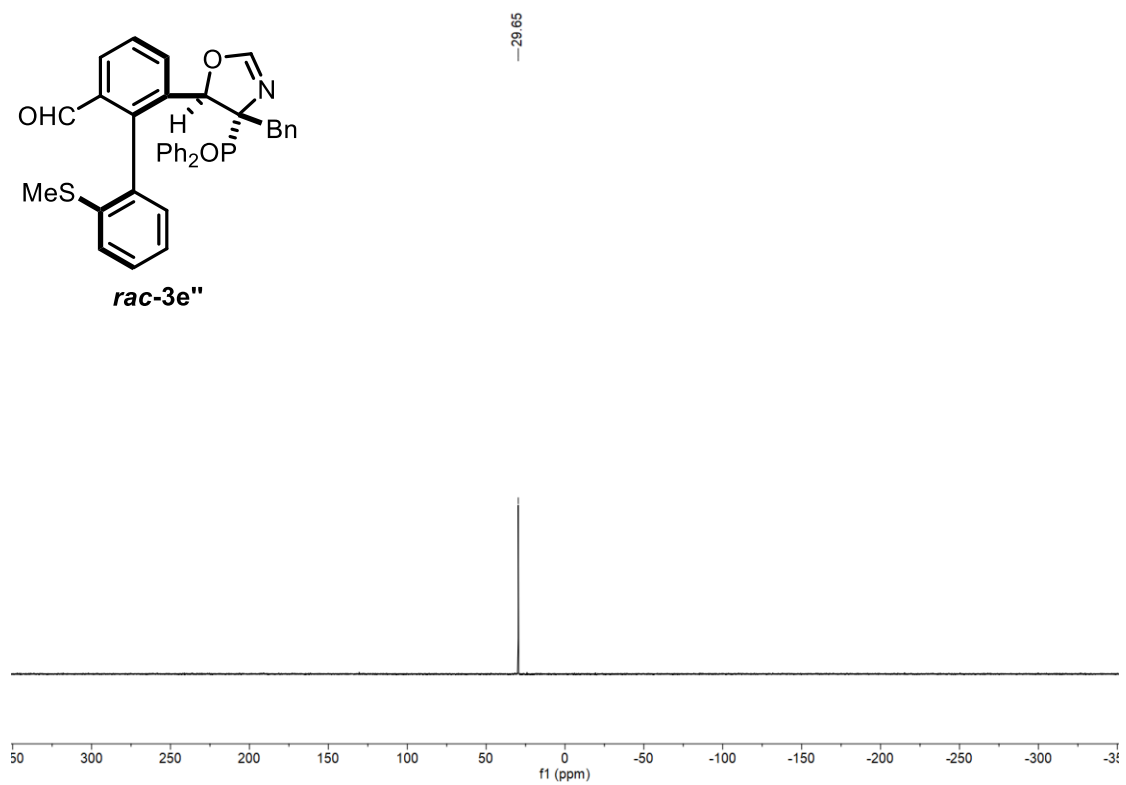

Supplement: d3cc00708a1.pdf [file d3cc00708a1.pdf]
